# Supplementary material for: A tandem reduction of primary amines, carbonyl compounds, CO2, and boranes catalyzed by in situ formed frustrated Lewis pairs
Source: Royal Society of Chemistry journal article supplement (doi:10.1039/d2qo00504b), 2022-01-01

## Supporting Information

### A Tandem Reduction of Primary Amines, Carbonyl Compounds, CO<sub>2</sub>, and Borane Catalyzed by in-situ Formed Frustrated Lewis Pairs

Fuqiang Xiong,<sup>a</sup> Qi Cheng,<sup>b</sup> Yanfeng Dang\*,<sup>b</sup> Ke Gao\*<sup>a</sup>

<sup>a</sup> Hubei International Scientific and Technological Cooperation Base of Pesticide and Green Synthesis, Key Laboratory of Pesticide & Chemical Biology, Ministry of Education, College of Chemistry, Central China Normal University, 152 Luoyu Road, Wuhan, Hubei 430079, P. R. China.

<sup>b</sup> Tianjin Key Laboratory of Molecular Optoelectronic Sciences, Department of Chemistry, Tianjin University, Tianjin 300072, P. R. China.

#### Table of Contents

|                                                         |     |
|---------------------------------------------------------|-----|
| 1. General Information.....                             | S1  |
| 2. General Procedure and Spectral Data of Products..... | S1  |
| 3. Mechanistic Studies.....                             | S22 |
| 4. References.....                                      | S45 |
| 5. <sup>1</sup> H and <sup>13</sup> C NMR Spectra.....  | S47 |

## 1. General Information.

Unless otherwise noted, materials were purchased from Adamas, Energy-Chemical and other commercial suppliers and were used as received. Flash column chromatography was performed using 200-300 mesh silica gel.  $^1\text{H}$  and  $^{13}\text{C}$  nuclear magnetic resonance (NMR) spectra were recorded on VARIAN-400 (400 MHz) or Bruker AV-400 (400 MHz) NMR spectrometers. Chemical shifts ( $\delta$ ) are reported in ppm from the resonance of tetramethyl silane as the internal standard (TMS: 0.00 ppm). Data are reported as follows: chemical shift, multiplicity (s = singlet, d = doublet, t = triplet, q = quartet, m = multiplet), coupling constants (Hz) and integration. Gas chromatographic (GC) analysis was performed on a Shimadzu GC-2010 system equipped with an FID detector and a capillary column, and the tridecane as the internal standard. High-resolution mass spectra (HRMS) were obtained with a MICROTOF-10454 Premier LC HR mass spectrometer. Enantiomeric ratio (ee) values were determined by chiral HPLC with chiral IC, AZ columns with n-hexane and *i*-PrOH as solvents. IR was measured with a Bruker TENSOR 27.

## 2. General Procedure and Spectral Data of Products.

### 2.1 General Procedure for the Reaction of Aldehydes

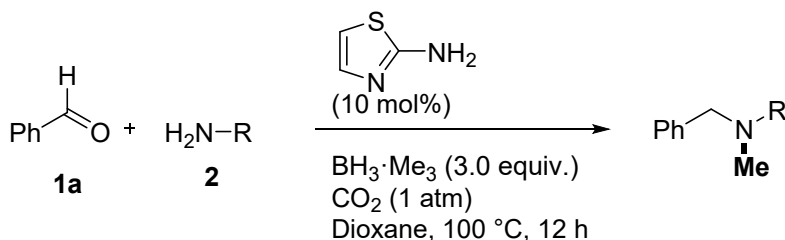

In a Schlenk tube was placed benzaldehyde (53.1 mg, 0.5 mmol), aniline (46.6 mg, 0.5 mmol),  $\text{BH}_3 \cdot \text{NMe}_3$  (109.7 mg, 1.5 mmol), 2-aminothiazole (5.0 mg, 0.05 mmol), and dioxane (0.5 mL). The resulting mixture was stirred with a  $\text{CO}_2$  balloon at  $100^\circ\text{C}$  (heating block) for 12 h, and then allowed to room temperature. The reaction was quenched by brine (1 mL). The aqueous layer was extracted with EtOAc (2 mL x 3). The combined organic layers were dried over  $\text{MgSO}_4$  and concentrated under reduced pressure. The crude product was purified by column chromatography (silica gel, EtOAc/PE =200/1) to afford *N*-Benzyl-*N*-methylaniline (3) in 80% (78.9 mg) as a yellow oil.

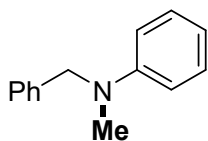

$^1\text{H}$  NMR ( $\text{CDCl}_3$ , 400 MHz):  $\delta$  7.50 (d,  $J = 7.8$  Hz, 2H), 7.38 (t,  $J = 7.2$  Hz, 2H), 7.33-7.29 (m, 2H), 7.25 (d,  $J = 7.2$  Hz, 2H), 6.57 (d,  $J = 7.9$  Hz, 2H), 4.57 (s, 2H), 3.07 (s, 3H).  $^{13}\text{C}\{^1\text{H}\}$  NMR ( $\text{CDCl}_3$ , 100 MHz):  $\delta$  149.7, 139.0, 129.1, 128.5, 126.8, 126.7, 116.5, 112.3, 56.5, 38.4. The physical and spectral data were consistent with those previously reported.<sup>1</sup>

#### ***N*-Benzyl-*N*,4-dimethylaniline (4)**

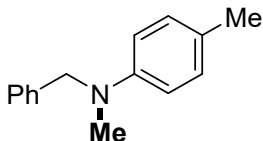

The typical procedure was applied to benzaldehyde (53.1 mg, 0.5 mmol), *p*-toluidine (54.0 mg, 0.5 mmol). Yield: 97.1 mg, 92 %, yellow oil;  $R_f = 0.8$  (PE/EtOAc = 10/1); purified by column chromatography eluting with PE/EtOAc (200:1);  $^1\text{H}$  NMR ( $\text{CDCl}_3$ , 400 MHz):  $\delta$  7.38-7.34 (m, 2H), 7.30-7.29 (m, 3H), 7.09 (d,  $J = 8.4$  Hz, 2H), 6.74 (d,  $J = 8.4$  Hz, 2H), 4.54 (s, 2H), 3.02 (s, 3H), 2.31 (s, 3H).  $^{13}\text{C}\{^1\text{H}\}$  NMR ( $\text{CDCl}_3$ , 100 MHz):  $\delta$  147.8, 139.2, 129.7, 128.5, 126.8, 126.7, 125.7, 112.7, 57.0, 38.6, 20.2. The physical and spectral data were consistent with those previously reported.<sup>3</sup>

#### ***N*-Benzyl-4-methoxy-*N*-methylaniline (5)**

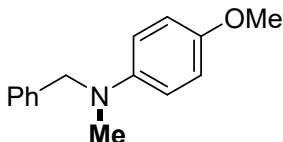

The typical procedure was applied to benzaldehyde (53.1 mg, 0.5 mmol), 4-methoxyaniline (62.0 mg, 0.5 mmol). Yield: 102.0 mg, 90 %, yellow oil;  $R_f = 0.8$  (PE/EtOAc = 10/1); purified by column chromatography eluting with PE/EtOAc (200:1);  $^1\text{H}$  NMR ( $\text{CDCl}_3$ , 400 MHz):  $\delta$  7.33-7.30 (m, 2H), 7.26-7.24 (m, 3H), 6.83 (d,  $J = 9.0$  Hz, 2H), 6.75 (d,  $J = 9.0$  Hz, 2H), 4.43 (s, 2H), 3.75 (s, 3H), 2.92 (s, 3H).  $^{13}\text{C}\{^1\text{H}\}$  NMR ( $\text{CDCl}_3$ , 100 MHz):  $\delta$  151.7, 144.7, 139.2, 128.4, 127.1, 126.8, 114.7, 114.5, 57.9, 55.7, 39.0. The physical and spectral data were consistent with those previously reported.<sup>2</sup>

#### ***N*-Benzyl-*N*-methyl-4-(methylthio)aniline (6)**

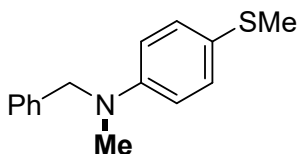

The typical procedure was applied to benzaldehyde (53.1 mg, 0.5 mmol), 4-(methylthio)aniline (69.6 mg, 0.5 mmol). Yield: 97.3 mg, 80 %, yellow oil;  $R_f = 0.5$  (PE/EtOAc = 20/1); purified by column chromatography eluting with PE/EtOAc (300:1);  $^1\text{H}$  NMR ( $\text{CDCl}_3$ , 400 MHz):  $\delta$  7.40-7.36 (m, 2H), 7.33-7.29 (m, 3H), 6.90 (d,  $J = 8.1$  Hz, 2H), 6.82 (d,  $J = 8.1$  Hz, 2H), 4.49 (s, 2H), 3.81 (s, 3H), 2.98 (s, 3H).  $^{13}\text{C}\{^1\text{H}\}$  NMR

(CDCl<sub>3</sub>, 100 MHz):  $\delta$  145.1, 139.9, 130.9, 128.2, 128.0, 126.8, 125.4, 115.5, 55.8, 35.8, 18.6. HRMS(ESI)  $m/z$ : [M + H]<sup>+</sup> Calcd for C<sub>15</sub>H<sub>18</sub>NS 244.1154; Found 244.1149; IR (KBr)  $\nu$  (cm<sup>-1</sup>): 2917, 2799, 1584, 1561, 1490, 1346, 1104, 988, 955, 759, 685.

#### ***N*-Benzyl-*N*-methyl-[1,1'-biphenyl]-4-amine (7)**

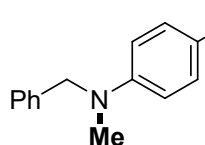

The typical procedure was applied to benzaldehyde (53.1 mg, 0.5 mmol), [1,1'-biphenyl]-4-amine (85.0 mg, 0.5 mmol). Yield: 122.0 mg, 89 %, yellow oil;  $R_f$  = 0.5 (PE/EtOAc = 20/1); purified by column chromatography eluting with PE/EtOAc (300:1); <sup>1</sup>H NMR (CDCl<sub>3</sub>, 400 MHz):  $\delta$  7.63-7.61 (m, 2H), 7.56 (d,  $J$  = 8.8 Hz, 2H), 7.47-7.38 (m, 4H), 7.33-7.31 (m, 4H), 6.88 (d,  $J$  = 8.8 Hz, 2H), 4.64 (s, 2H), 3.13 (s, 3H). <sup>13</sup>C {<sup>1</sup>H} NMR (CDCl<sub>3</sub>, 100 MHz):  $\delta$  149.0, 141.1, 138.8, 129.2, 128.6, 128.5, 127.8, 126.9, 126.6, 125.9, 126.2, 112.5, 56.5, 38.6. The physical and spectral data were consistent with those previously reported.<sup>4</sup>

#### ***N*-Benzyl-4-fluoro-*N*-methylaniline (8)**

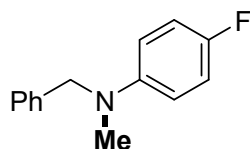

The typical procedure was applied to benzaldehyde (53.1 mg, 0.5 mmol), 4-fluoroaniline (55.6 mg, 0.5 mmol). Yield: 85.0 mg, 79 %, yellow oil;  $R_f$  = 0.6 (PE/EtOAc = 20/1); purified by column chromatography eluting with PE/EtOAc (300:1); <sup>1</sup>H NMR (CDCl<sub>3</sub>, 400 MHz):  $\delta$  7.34-7.31 (m, 2H), 7.27-7.22 (m, 4H), 6.95-6.90 (m, 2H), 6.70-6.66 (m, 2H), 4.48 (s, 2H), 2.98 (s, 3H). <sup>13</sup>C {<sup>1</sup>H} NMR (CDCl<sub>3</sub>, 100 MHz):  $\delta$  155.5 (d, <sup>1</sup> $J_{C-F}$  = 234.0 Hz), 146.5, 138.8, 128.6, 126.9, 126.8, 115.5 (d, <sup>2</sup> $J_{C-F}$  = 22.0 Hz), 113.6 (d, <sup>3</sup> $J_{C-F}$  = 8.0 Hz), 57.5, 39.1. The physical and spectral data were consistent with those previously reported.<sup>4</sup>

#### ***N*-Benzyl-4-chloro-*N*-methylaniline (9)**

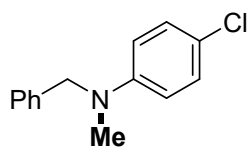

The typical procedure was applied to benzaldehyde (53.1 mg, 0.5 mmol), 4-chloroaniline (64.0 mg, 0.5 mmol). Yield: 95.0 mg, 82 %, yellow oil;  $R_f$  = 0.8 (PE/EtOAc = 10/1); purified by column chromatography eluting with PE/EtOAc (300:1); <sup>1</sup>H NMR (CDCl<sub>3</sub>, 400 MHz):  $\delta$  7.31-7.27 (m, 2H), 7.24-7.18 (m, 1H), 7.18-7.16 (m, 2H), 7.12 (d,  $J$  = 9.1 Hz, 2H), 6.62 (d,  $J$  = 9.1 Hz, 2H), 4.48 (s, 2H), 2.97 (s, 3H). <sup>13</sup>C {<sup>1</sup>H} NMR (CDCl<sub>3</sub>, 100 MHz):  $\delta$  148.2, 138.4, 128.9, 128.6, 126.9, 126.6, 121.2, 113.4, 56.6, 38.7. The physical and spectral data were consistent with those previously reported.<sup>1</sup>

### ***N*-Benzyl-4-bromo-*N*-methylaniline (10)**

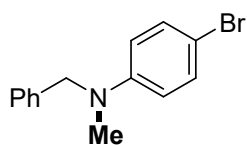

The typical procedure was applied to benzaldehyde (53.1 mg, 0.5 mmol), 4-bromoaniline (86.0 mg, 0.5 mmol). Yield: 117.0 mg, 85 %, yellow oil;  $R_f = 0.8$  (PE/EtOAc = 10/1); purified by column chromatography eluting with PE/EtOAc (300:1);  $^1\text{H}$  NMR ( $\text{CDCl}_3$ , 400 MHz):  $\delta$  7.31-7.28 (m, 2H), 7.23 (d,  $J = 9.1$  Hz, 2H), 7.23-7.16 (m, 3H), 6.58 (d,  $J = 9.1$  Hz, 2H), 4.48 (s, 2H), 2.98 (s, 3H).  $^{13}\text{C}\{^1\text{H}\}$  NMR ( $\text{CDCl}_3$ , 100 MHz):  $\delta$  148.5, 138.3, 131.7, 128.6, 127.0, 126.5, 113.9, 108.3, 56.5, 38.7. The physical and spectral data were consistent with those previously reported.<sup>5</sup>

### ***N*-Benzyl-4-iodo-*N*-methylaniline (11)**

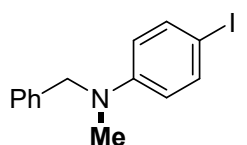

The typical procedure was applied to benzaldehyde (53.1 mg, 0.5 mmol), 4-iodoaniline (110.0 mg, 0.5 mmol). Yield: 141.0 mg, 87 %, yellow oil;  $R_f = 0.8$  (PE/EtOAc = 10/1); purified by column chromatography eluting with PE/EtOAc (300:1);  $^1\text{H}$  NMR ( $\text{CDCl}_3$ , 400 MHz):  $\delta$  7.43 (d,  $J = 9.0$  Hz, 2H), 7.33-7.29 (m, 2H), 7.26-7.22 (m, 1H), 7.19-7.17 (m, 2H), 6.50 (d,  $J = 9.0$  Hz, 2H), 4.50 (s, 2H), 3.00 (s, 3H).  $^{13}\text{C}\{^1\text{H}\}$  NMR ( $\text{CDCl}_3$ , 100 MHz):  $\delta$  149.0, 138.2, 137.6, 128.6, 127.0, 126.5, 114.5, 77.3, 56.3, 38.6. The physical and spectral data were consistent with those previously reported.<sup>6</sup>

### ***N*-Benzyl-*N*-methyl-4-(trifluoromethyl)aniline (12)**

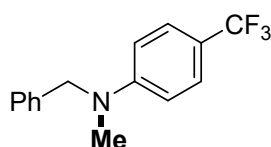

The typical procedure was applied to benzaldehyde (53.1 mg, 0.5 mmol), 4-(trifluoromethyl)aniline (80.6 mg, 0.5 mmol). Yield: 104.5 mg, 79 %, yellow oil;  $R_f = 0.7$  (PE/EtOAc = 20/1); purified by column chromatography eluting with PE/EtOAc (300:1);  $^1\text{H}$  NMR ( $\text{CDCl}_3$ , 400 MHz):  $\delta$  7.43 (d,  $J = 8.7$  Hz, 2H), 7.33 (t,  $J = 7.3$  Hz, 2H), 7.30-7.23 (m, 2H), 7.19 (d,  $J = 7.5$  Hz, 2H), 6.73 (d,  $J = 8.7$  Hz, 2H), 4.60 (s, 2H), 3.11 (s, 3H).  $^{13}\text{C}\{^1\text{H}\}$  NMR ( $\text{CDCl}_3$ , 100 MHz):  $\delta$  151.6, 137.9, 128.7, 127.1, 126.5 (q,  $^3J_{\text{C-F}} = 4.0$  Hz), 125.1 (q,  $^1J_{\text{C-F}} = 265.0$  Hz), 117.8 (q,  $^2J_{\text{C-F}} = 32.0$  Hz), 56.1, 38.7. The physical and spectral data were consistent with those previously reported.<sup>7</sup>

### ***N*-Benzyl-*N*-methyl-4-nitroaniline (13)**

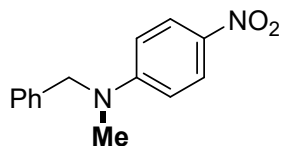

The typical procedure was applied to benzaldehyde (53.1 mg, 0.5 mmol), 4-nitroaniline (69.0 mg, 0.5 mmol). Yield: 91.3 mg, 76 %, yellow oil;  $R_f = 0.4$  (PE/EtOAc = 10/1); purified by column chromatography eluting with PE/EtOAc (100:1);  $^1\text{H NMR}$  ( $\text{CDCl}_3$ , 400 MHz):  $\delta$  8.10 (d,  $J = 9.4$  Hz, 2H), 7.36-7.28 (m, 3H), 7.17-7.15 (m, 2H), 6.67 (d,  $J = 9.4$  Hz, 2H), 4.68 (s, 2H), 3.19 (s, 3H).  $^{13}\text{C}\{^1\text{H}\}$  NMR ( $\text{CDCl}_3$ , 100 MHz):  $\delta$  153.8, 137.4, 136.7, 129.0, 127.6, 126.3, 126.2, 110.6, 56.1, 39.2. The physical and spectral data were consistent with those previously reported.<sup>7</sup>

#### Methyl 4-(benzyl(methyl)amino)benzoate (14)

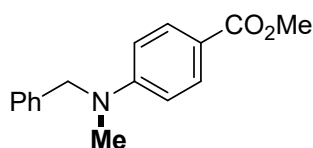

The typical procedure was applied to benzaldehyde (53.1 mg, 0.5 mmol), methyl 4-aminobenzoate (75.6 mg, 0.5 mmol). Yield: 102.0 mg, 80 %, yellow oil;  $R_f = 0.8$  (PE/EtOAc = 5/1); purified by column chromatography eluting with PE/EtOAc (50:1);  $^1\text{H NMR}$  ( $\text{CDCl}_3$ , 400 MHz):  $\delta$  7.33-7.29 (m, 2H), 7.26-7.23 (m, 3H), 7.03 (d,  $J = 8.3$  Hz, 2H), 6.69 (d,  $J = 8.2$  Hz, 2H), 4.49 (s, 2H), 2.98 (s, 3H), 2.25 (s, 3H).  $^{13}\text{C}\{^1\text{H}\}$  NMR ( $\text{CDCl}_3$ , 100 MHz):  $\delta$  167.1, 151.0, 139.9, 131.4, 128.2, 128.0, 126.8, 119.2, 113.5, 55.9, 51.4, 35.8. The physical and spectral data were consistent with those previously reported<sup>8</sup>

#### 4-(Methyl(4-nitrobenzyl)amino)phenol (15)

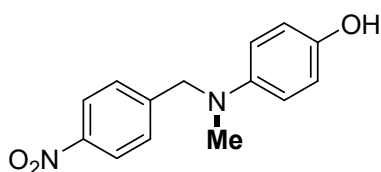

The typical procedure was applied to 4-nitrobenzaldehyde (76.0 mg, 0.5 mmol), 4-aminophenol (55.0 mg, 0.5 mmol). Yield: 104.6 mg, 81 %, yellow oil;  $R_f = 0.8$  (PE/EtOAc = 1/1); purified by column chromatography eluting with PE/EtOAc (50:1);  $^1\text{H NMR}$  ( $\text{CDCl}_3$ , 400 MHz):  $\delta$  8.17 (d,  $J = 8.7$  Hz, 2H), 7.41 (d,  $J = 8.7$  Hz, 2H), 6.75 (d,  $J = 9.0$  Hz, 2H), 6.65 (d,  $J = 9.0$  Hz, 2H), 4.49 (s, 2H), 4.41 (br, 1H), 2.95 (s, 3H).  $^{13}\text{C}\{^1\text{H}\}$  NMR ( $\text{CDCl}_3$ , 100 MHz):  $\delta$  152.8, 139.9, 138.6, 128.3, 128.0, 126.8, 126.2, 113.0, 55.9, 35.8. The physical and spectral data were consistent with those previously reported. HRMS(ESI)  $m/z$ :  $[\text{M} + \text{H}]^+$  Calcd for  $\text{C}_{14}\text{H}_{15}\text{N}_2\text{O}_3$  259.1077; Found 259.1072; IR (KBr)  $\nu$  ( $\text{cm}^{-1}$ ): 3425, 3324, 2912, 2754, 1520, 1516, 1456, 1358, 1018, 925, 890.

#### N-Benzyl-N,2-dimethylaniline (16)

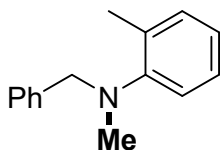

The typical procedure was applied to benzaldehyde (53.1 mg, 0.5 mmol), o-toluidine (53.6 mg, 0.5 mmol). Yield: 80.0 mg, 76 %, yellow oil;  $R_f = 0.6$  (PE/EtOAc = 2/1); purified by column chromatography eluting with PE/EtOAc (20:1);  $^1\text{H NMR}$  ( $\text{CDCl}_3$ , 400 MHz):  $\delta$  7.39 (d,  $J = 7.6$  Hz, 2H), 7.33 (t,  $J = 7.1$  Hz, 2H), 7.28-7.26 (m, 2H), 7.22-7.16 (m, 2H), 7.09 (d,  $J = 7.9$  Hz, 1H), 6.99 (t,  $J = 7.2$  Hz, 1H), 4.04 (s, 2H), 2.59 (s, 3H), 2.42 (s, 3H).  $^{13}\text{C}\{^1\text{H}\}$  NMR ( $\text{CDCl}_3$ , 100 MHz):  $\delta$  152.4, 139.1, 132.9, 131.2, 128.4, 128.3, 127.0, 126.5, 123.0, 120.0, 60.8, 40.9, 18.4. The physical and spectral data were consistent with those previously reported.<sup>3</sup>

#### ***N*-Benzyl-4-ethyl-*N*-methylaniline (17)**

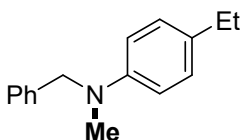

The typical procedure was applied to benzaldehyde (53.1 mg, 0.5 mmol), 4-acetylaniline (68.0 mg, 0.5 mmol). Yield: 90.1 mg, 80 %, yellow oil;  $R_f = 0.8$  (PE/EtOAc = 5/1); purified by column chromatography eluting with PE/EtOAc (100:1);  $^1\text{H NMR}$  ( $\text{CDCl}_3$ , 400 MHz):  $\delta$  7.41-7.38 (m, 2H), 7.34-7.30 (m, 3H), 7.15 (d,  $J = 8.4$  Hz, 2H), 6.80 (d,  $J = 8.4$  Hz, 2H), 4.57 (s, 2H), 3.06 (s, 3H), 2.65 (q,  $J = 7.5$  Hz, 2H), 1.31-1.28 (t,  $J = 7.5$  Hz, 3H).  $^{13}\text{C}\{^1\text{H}\}$  NMR ( $\text{CDCl}_3$ , 100 MHz):  $\delta$  147.9, 139.3, 132.3, 128.5, 128.4, 126.8, 113.1, 112.6, 57.0, 38.6, 27.7, 15.9. IR (KBr)  $\nu$  ( $\text{cm}^{-1}$ ): 2970, 2775, 1602, 1584, 1510, 1451, 737, 692.

#### ***N*-Benzyl-*N*,4-dimethylaniline (4)**

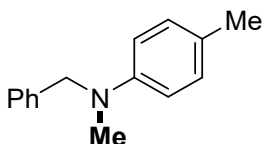

The typical procedure was applied to benzaldehyde (53.1 mg, 0.5 mmol), 4-aminobenzoic acid (68.6 mg, 0.5 mmol). Yield: 91.0 mg, 86 %, yellow oil;  $R_f = 0.8$  (PE/EtOAc = 10/1); purified by column chromatography eluting with PE/EtOAc (200:1);  $^1\text{H NMR}$  ( $\text{CDCl}_3$ , 400 MHz):  $\delta$  7.38-7.34 (m, 2H), 7.30-7.29 (m, 3H), 7.09 (d,  $J = 8.4$  Hz, 2H), 6.74 (d,  $J = 8.4$  Hz, 2H), 4.54 (s, 2H), 3.02 (s, 3H), 2.31 (s, 3H).  $^{13}\text{C}\{^1\text{H}\}$  NMR ( $\text{CDCl}_3$ , 100 MHz):  $\delta$  147.8, 139.2, 129.7, 128.5, 126.8, 126.7, 125.7, 112.7, 57.0, 38.6, 20.2. The physical and spectral data were consistent with those previously reported.<sup>3</sup>

#### ***N*-Benzyl-*N*-methylnaphthalen-2-amine (18)**

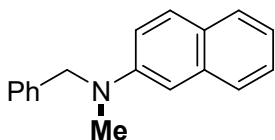

The typical procedure was applied to benzaldehyde (53.1 mg, 0.5 mmol), naphthalen-2-amine (72.0 mg, 0.5 mmol). Yield: 105.1

mg, 85 %, yellow oil;  $R_f$  = 0.6 (PE/EtOAc = 10/1); purified by column chromatography eluting with PE/EtOAc (100:1);  $^1\text{H}$  NMR ( $\text{CDCl}_3$ , 400 MHz):  $\delta$  7.60-7.55 (m, 3H), 7.50-7.48 (m, 2H), 7.27 (s, 1H), 7.15-7.11 (m, 3H), 6.88-6.82 (m, 3H), 4.59 (s, 2H), 2.54 (s, 3H).  $^{13}\text{C}\{^1\text{H}\}$  NMR ( $\text{CDCl}_3$ , 100 MHz):  $\delta$  144.1, 140.9, 134.9, 129.2, 128.6, 128.0, 127.7, 127.6, 127.0, 126.4, 125.8, 122.5, 118.3, 108.7, 65.4, 54.2. The physical and spectral data were consistent with those previously reported.<sup>9</sup>

#### ***N*-Benzyl-*N*-methylpyridin-2-amine (19)**

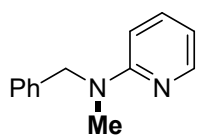

The typical procedure was applied to benzaldehyde (53.1 mg, 0.5 mmol), pyridin-2-amine (47.0 mg, 0.5 mmol). Yield: 161.0 mg, 81 %, yellow oil;  $R_f$  = 0.5 (PE/EtOAc = 10/1); purified by column chromatography eluting with PE/EtOAc (100:1);  $^1\text{H}$  NMR ( $\text{CDCl}_3$ , 400 MHz):  $\delta$  8.22-8.21 (m, 1H), 7.48-7.43 (m, 1H), 7.35-7.31 (m, 2H), 7.28-7.24 (m, 3H), 6.60-6.59 (m, 1H), 6.54-6.52 (m, 1H), 4.83 (s, 2H), 3.10 (s, 3H).  $^{13}\text{C}\{^1\text{H}\}$  NMR ( $\text{CDCl}_3$ , 100 MHz):  $\delta$  158.9, 148.0, 138.7, 137.3, 128.5, 127.0, 126.9, 111.8, 105.7, 53.2, 36.2. The physical and spectral data were consistent with those previously reported.<sup>3</sup>

#### ***N*-Benzyl-*N*-methyl-2-phenylethan-1-amine (20)**

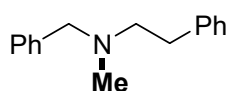

The typical procedure was applied to benzaldehyde (53.1 mg, 0.5 mmol), 2-phenylethan-1-amine (60.6 mg, 0.5 mmol). Yield: 84.0 mg, 75 %, yellow oil;  $R_f$  = 0.5 (PE/EtOAc = 20/1); purified by column chromatography eluting with PE/EtOAc (200:1);  $^1\text{H}$  NMR ( $\text{CDCl}_3$ , 400 MHz):  $\delta$  7.29-7.26 (m, 2H), 7.24-7.04 (m, 8H), 3.53 (s, 2H), 2.80 (t,  $J$  = 8.4 Hz, 2H), 2.62 (t,  $J$  = 8.4 Hz, 2H), 2.25 (s, 3H).  $^{13}\text{C}\{^1\text{H}\}$  NMR ( $\text{CDCl}_3$ , 100 MHz):  $\delta$  140.5, 138.9, 129.0, 128.7, 128.3, 128.2, 126.9, 125.9, 62.2, 59.2, 42.2, 33.9. The physical and spectral data were consistent with those previously reported.<sup>10</sup>

#### ***N*-Methyl-*N*-(4-nitrobenzyl)cyclohexanamine (21)**

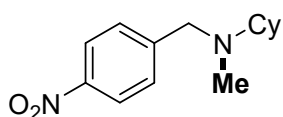

The typical procedure was applied to 4-nitrobenzaldehyde (76.0 mg, 0.5 mmol), cyclohexanamine (49.6 mg, 0.5 mmol). Yield: 111.7 mg, 90 %, yellow oil;  $R_f$  = 0.5 (PE/EtOAc = 5/1); purified by column chromatography eluting with PE/EtOAc (50:1);  $^1\text{H}$  NMR ( $\text{CDCl}_3$ , 400 MHz):  $\delta$  8.12 (d,  $J$  = 8.4 Hz, 2H), 7.47 (d,  $J$  = 8.4 Hz, 2H), 3.89 (s, 2H), 2.62 (s, 3H), 2.44-2.39



(m, 1H), 1.88-1.85 (m, 2H), 1.70-1.68 (m, 2H), 1.58-1.56 (m, 1H), 1.22-1.05 (m, 5H).  $^{13}\text{C}\{^1\text{H}\}$  NMR ( $\text{CDCl}_3$ , 100 MHz):  $\delta$  148.9, 146.6, 128.4, 123.4, 56.2, 54.0, 50.1, 33.4, 25.9, 24.8. The physical and spectral data were consistent with those previously reported.<sup>20</sup>

**(S)-N-Benzyl-N-methyl-1-(naphthalen-1-yl)ethan-1-amine (22)**

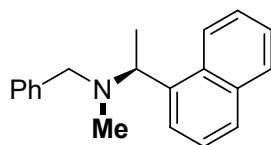

The typical procedure was applied to benzaldehyde (53.1 mg, 0.5 mmol), (S)-1-(naphthalen-1-yl)ethan-1-amine (85.6 mg, 0.5 mmol). Yield: 118.3 mg, 86 %, yellow oil;  $R_f$  = 0.5 (PE/EtOAc =

10/1); purified by column chromatography eluting with PE/EtOAc (200:1); 98:2 ee, determined by HPLC analysis (Chiralpak AS column, hexane/i-PrOH, 95:5 v/v, flow rate 1 mL/min,  $\lambda$  = 220 nm, 25 °C), tR (major) = 3.411 min, tR (minor) = 4.387 min;  $^1\text{H}$  NMR ( $\text{CDCl}_3$ , 400 MHz):  $\delta$  8.47 (d,  $J$  = 8.2 Hz, 1H), 7.86 (d,  $J$  = 7.0 Hz, 1H), 7.76 (d,  $J$  = 8.2 Hz, 1H), 7.67 (d,  $J$  = 7.0 Hz, 1H), 7.53-7.44 (m, 3H), 7.27-7.26 (m, 4H), 7.24-7.18 (m, 1H), 4.42-3.37 (q,  $J$  = 6.5 Hz, 1H), 3.66 (d,  $J$  = 13.2 Hz, 1H), 3.43 (d,  $J$  = 13.2 Hz, 1H), 2.21 (s, 3H), 1.57 (d,  $J$  = 7.0 Hz, 3H).  $^{13}\text{C}\{^1\text{H}\}$  NMR ( $\text{CDCl}_3$ , 100 MHz):  $\delta$  140.8, 140.2, 134.2, 131.9, 128.8, 128.7, 128.2, 127.6, 126.7, 125.5, 125.4, 125.3, 124.7, 124.6, 60.7, 59.2, 38.5, 16.8. HRMS(ESI) m/z:  $[\text{M} + \text{H}]^+$  Calcd for  $\text{C}_{20}\text{H}_{22}\text{N}$  276.1748; Found 276.1743; IR (KBr)  $\nu$  ( $\text{cm}^{-1}$ ): 2970, 2787, 1600, 1577, 1491, 1444, 1229, 796, 776, 736, 697.

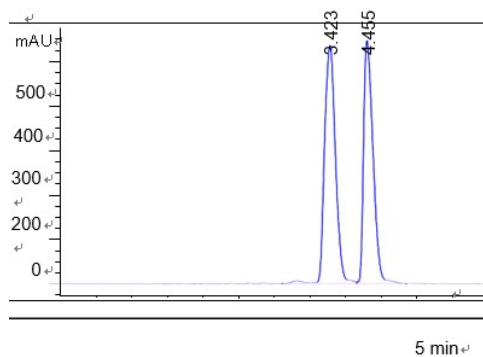

| Peak # | RetTime [min] | Type | Width [min] | Area [mAU*s] | Height [mAU] | Area %  |
|--------|---------------|------|-------------|--------------|--------------|---------|
| 1      | 3.423         | BB   | 0.0972      | 2613.33432   | 752.66867    | 48.5922 |
| 2      | 4.455         | BB   | 0.0940      | 2764.76021   | 800.23354    | 51.4078 |

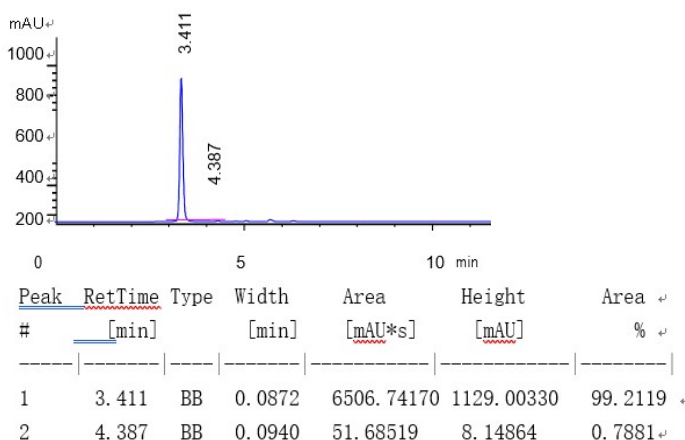

### *N*<sup>1</sup>,*N*<sup>4</sup>-Dibenzyl-*N*<sup>1</sup>,*N*<sup>4</sup>-dimethylbenzene-1,4-diamine (23)

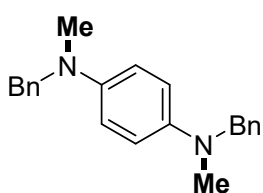

The typical procedure was applied to benzaldehyde (53.1 mg, 0.5 mmol), benzene-1,4-diamine (27.0 mg, 0.25 mmol). Yield: 71.0 mg, 90 %, yellow oil;  $R_f = 0.5$  (PE/EtOAc = 10/1); purified by column chromatography eluting with PE/EtOAc (200:1); <sup>1</sup>H NMR (CDCl<sub>3</sub>, 400 MHz):  $\delta$  7.31-7.20 (m, 10H), 6.75 (s, 4H), 4.36 (s, 4H), 2.85 (s, 6H). <sup>13</sup>C{<sup>1</sup>H} NMR (CDCl<sub>3</sub>, 100 MHz):  $\delta$  142.9, 139.5, 128.4, 127.3, 126.7, 115.1, 58.3, 39.0. HRMS(ESI)  $m/z$ : [M + H]<sup>+</sup> Calcd for C<sub>22</sub>H<sub>25</sub>N<sub>2</sub> 317.2012; Found 317.2015; IR (KBr)  $\nu$  (cm<sup>-1</sup>): 3028, 2790, 1600, 1586, 1494, 1453, 1363, 1024, 736, 698.

### *N*<sup>2</sup>,*N*<sup>4</sup>,*N*<sup>6</sup>-Tribenzyl-*N*<sup>2</sup>,*N*<sup>4</sup>,*N*<sup>6</sup>-trimethyl-1,3,5-triazine-2,4,6-triamine (24)

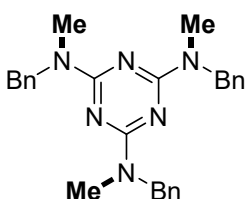

The typical procedure was applied to benzaldehyde (53.1 mg, 0.5 mmol), 1,3,5-triazine-2,4,6-triamine (21.0 mg, 0.17 mmol). Yield: 153.0 mg, 70 %, yellow oil;  $R_f = 0.4$  (PE/EtOAc = 10/1); purified by column chromatography eluting with PE/EtOAc (200:1); <sup>1</sup>H NMR (CDCl<sub>3</sub>, 400 MHz):  $\delta$  7.35-7.32 (m, 6H), 7.29-7.28 (m, 5H), 7.22 (d,  $J = 3.6$  Hz, 2H), 6.50 (d,  $J = 3.6$  Hz, 2H), 4.71 (s, 6H), 3.06 (s, 9H). <sup>13</sup>C{<sup>1</sup>H} NMR (CDCl<sub>3</sub>, 100 MHz):  $\delta$  163.9, 146.6, 138.2, 116.3, 110.7, 53.2, 52.9. HRMS(ESI)  $m/z$ : [M + H]<sup>+</sup> Calcd for C<sub>27</sub>H<sub>31</sub>N<sub>6</sub> 439.2605; Found 439.2607; IR (KBr)  $\nu$  (cm<sup>-1</sup>): 3426, 1602, 1541, 1496, 1450, 1212, 805.

### *N*-Methyl-*N*-(4-methylbenzyl)aniline (25)

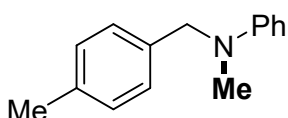

The typical procedure was applied to 4-methylbenzaldehyde (60.1 mg, 0.5 mmol), aniline (46.6 mg, 0.5 mmol). Yield: 85.0

mg, 80 %, yellow oil;  $R_f$  = 0.5 (PE/EtOAc = 20/1); purified by column chromatography eluting with PE/EtOAc (200:1);  $^1\text{H}$  NMR ( $\text{CDCl}_3$ , 400 MHz):  $\delta$  7.40-7.34 (m, 2H), 7.31-7.26 (m, 4H), 6.90-6.83 (m, 3H), 4.62 (s, 2H), 3.12 (s, 3H), 2.47 (s, 3H).  $^{13}\text{C}\{^1\text{H}\}$  NMR ( $\text{CDCl}_3$ , 100 MHz):  $\delta$  149.7, 136.3, 135.8, 129.2, 129.1, 126.7, 116.4, 112.3, 56.2, 38.3, 21.0. The physical and spectral data were consistent with those previously reported.<sup>11</sup>

#### ***N*-(4-Methoxybenzyl)-*N*-methylaniline (26)**

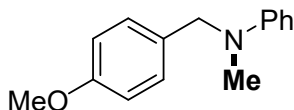

The typical procedure was applied to 4-methoxybenzaldehyde (68.1 mg, 0.5 mmol), aniline (46.6 mg, 0.5 mmol). Yield: 97.0 mg, 85 %, yellow oil;  $R_f$  = 0.5 (PE/EtOAc = 20/1); purified by column chromatography eluting with PE/EtOAc (200:1);  $^1\text{H}$  NMR ( $\text{CDCl}_3$ , 400 MHz):  $\delta$  7.32-7.28 (m, 2H), 7.23 (d,  $J$  = 8.2 Hz, 2H), 6.93 (m, 2H), 6.84 (d,  $J$  = 8.2 Hz, 2H), 6.81-6.77 (m, 1H), 4.54 (s, 2H), 3.85 (s, 3H), 3.05 (s, 3H).  $^{13}\text{C}\{^1\text{H}\}$  NMR ( $\text{CDCl}_3$ , 100 MHz):  $\delta$  158.5, 149.7, 130.8, 129.1, 127.9, 116.5, 113.9, 112.4, 55.9, 55.2, 38.2. The physical and spectral data were consistent with those previously reported.<sup>1</sup>

#### ***N,N*-Dimethyl-4-((methyl(phenyl)amino)methyl)aniline (27)**

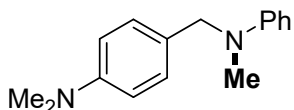

The typical procedure was applied to 4-(dimethylamino)benzaldehyde (75.0 mg, 0.5 mmol), aniline (46.6 mg, 0.5 mmol). Yield: 108.0 mg, 90 %, yellow oil;  $R_f$  = 0.2 (PE/EtOAc = 20/1); purified by column chromatography eluting with PE/EtOAc (150:1);  $^1\text{H}$  NMR ( $\text{CDCl}_3$ , 400 MHz):  $\delta$  7.28-7.24 (m, 2H), 7.15 (d,  $J$  = 8.2 Hz, 2H), 6.83 (d,  $J$  = 8.2 Hz, 2H), 6.76-6.73 (m, 3H), 4.48 (s, 2H), 3.01 (s, 3H), 2.96 (s, 6H).  $^{13}\text{C}\{^1\text{H}\}$  NMR ( $\text{CDCl}_3$ , 100 MHz):  $\delta$  150.0, 149.7, 129.1, 127.8, 126.6, 116.2, 112.8, 112.5, 55.9, 40.7, 38.1. The physical and spectral data were consistent with those previously reported.<sup>11</sup>

#### ***N*-Methyl-*N*-(4-(methylthio)benzyl)aniline (28)**

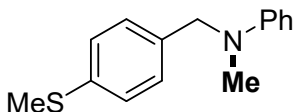

The typical procedure was applied to 4-(methylthio)benzaldehyde (76.1 mg, 0.5 mmol), aniline (46.6 mg, 0.5 mmol). Yield: 103.0 mg, 85 %, yellow oil;  $R_f$  = 0.5 (PE/EtOAc = 20/1); purified by column chromatography eluting with PE/EtOAc (300:1);  $^1\text{H}$  NMR ( $\text{CDCl}_3$ , 400 MHz):  $\delta$  7.12-7.08 (m, 4H), 7.04-7.02 (m, 2H), 6.64-6.58 (m, 3H), 4.35 (s, 2H), 2.87 (s, 3H), 2.32 (s, 3H).  $^{13}\text{C}\{^1\text{H}\}$  NMR ( $\text{CDCl}_3$ , 100 MHz):  $\delta$  149.5, 136.6,

135.9, 129.1, 127.2, 126.9, 116.5, 112.3, 56.1, 38.3, 15.9. The physical and spectral data were consistent with those previously reported.<sup>12</sup>

#### ***N*-(4-Fluorobenzyl)-*N*-methylaniline (29)**

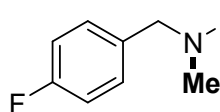

The typical procedure was applied to 4-fluorobenzaldehyde (62.1 mg, 0.5 mmol), aniline (46.6 mg, 0.5 mmol). Yield: 101.0 mg, 94 %, yellow oil;  $R_f = 0.5$  (PE/EtOAc = 20/1); purified by column chromatography eluting with PE/EtOAc (300:1);  $^1\text{H}$  NMR ( $\text{CDCl}_3$ , 400 MHz):  $\delta$  7.26-7.19 (m, 4H), 7.03-6.99 (m, 2H), 6.77-6.73 (m, 3H), 4.50 (s, 2H), 3.01 (s, 3H).  $^{13}\text{C}\{^1\text{H}\}$  NMR ( $\text{CDCl}_3$ , 100 MHz):  $\delta$  161.8 (d,  $^1J_{\text{C-F}} = 243.0$  Hz), 149.6, 134.5 ((d,  $^4J_{\text{C-F}} = 3.0$  Hz), 129.2, 128.2 (d,  $^3J_{\text{C-F}} = 8.0$  Hz), 116.8, 115.3 (d,  $^2J_{\text{C-F}} = 22.0$  Hz), 112.5, 56.0, 38.4. The physical and spectral data were consistent with those previously reported.<sup>13</sup>

#### ***N*-(4-Chlorobenzyl)-*N*-methylaniline (30)**

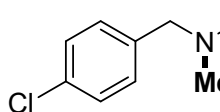

The typical procedure was applied to 4-chlorobenzaldehyde (70.0 mg, 0.5 mmol), aniline (46.6 mg, 0.5 mmol). Yield: 105.0 mg, 91 %, yellow oil;  $R_f = 0.4$  (PE/EtOAc = 20/1); purified by column chromatography eluting with PE/EtOAc (300:1);  $^1\text{H}$  NMR ( $\text{CDCl}_3$ , 400 MHz):  $\delta$  7.28-7.15 (m, 6H), 6.76-6.72 (m, 3H), 4.47 (s, 2H), 2.99 (s, 3H).  $^{13}\text{C}\{^1\text{H}\}$  NMR ( $\text{CDCl}_3$ , 100 MHz):  $\delta$  149.4, 137.5, 132.4, 129.2, 128.6, 128.0, 116.8, 112.4, 56.1, 38.5. The physical and spectral data were consistent with those previously reported.<sup>1</sup>

#### ***N*-(4-Bromobenzyl)-*N*-methylaniline (31)**

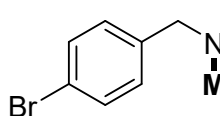

The typical procedure was applied to 4-bromobenzaldehyde (93.0 mg, 0.5 mmol), aniline (46.6 mg, 0.5 mmol). Yield: 127.0 mg, 92 %, yellow oil;  $R_f = 0.4$  (PE/EtOAc = 20/1); purified by column chromatography eluting with PE/EtOAc (300:1);  $^1\text{H}$  NMR ( $\text{CDCl}_3$ , 400 MHz):  $\delta$  7.44 (d,  $J = 8.2$  Hz, 2H), 7.28-7.22 (m, 2H), 7.12 (d,  $J = 8.2$  Hz, 2H), 6.77-6.73 (m, 3H), 4.48 (s, 2H), 3.01 (s, 3H).  $^{13}\text{C}\{^1\text{H}\}$  NMR ( $\text{CDCl}_3$ , 100 MHz):  $\delta$  149.4, 138.0, 131.6, 129.2, 128.4, 120.5, 116.8, 112.4, 56.1, 38.5. The physical and spectral data were consistent with those previously reported.<sup>12</sup>

#### ***N*-(4-Iodobenzyl)-*N*-methylaniline (32)**

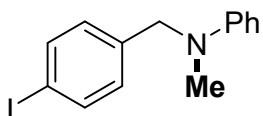

The typical procedure was applied to 4-iodobenzaldehyde (116.0 mg, 0.5 mmol), aniline (46.6 mg, 0.5 mmol). Yield: 145.0 mg, 90 %, yellow oil;  $R_f = 0.5$  (PE/EtOAc = 20/1); purified by column chromatography eluting with PE/EtOAc (300:1);  $^1\text{H NMR}$  ( $\text{CDCl}_3$ , 400 MHz):  $\delta$  7.68 (d,  $J = 8.2$  Hz, 2H), 7.30-7.26 (m, 2H), 7.04 (d,  $J = 8.2$  Hz, 2H), 6.81-6.77 (m, 3H), 4.51 (s, 2H), 3.05 (s, 3H).  $^{13}\text{C}\{^1\text{H}\}$  NMR ( $\text{CDCl}_3$ , 100 MHz):  $\delta$  149.4, 138.7, 137.5, 129.2, 128.7, 116.8, 112.4, 92.0, 56.2, 38.5. HRMS(ESI)  $m/z$ :  $[\text{M} + \text{H}]^+$  Calcd for  $\text{C}_{14}\text{H}_{15}\text{IN}$  324.0244; Found 324.0240; IR (KBr)  $\nu$  ( $\text{cm}^{-1}$ ): 3027, 2817, 1599, 1576, 1507, 1452, 748, 502.

#### ***N*-Methyl-*N*-(4-(trifluoromethyl)benzyl)aniline (33)**

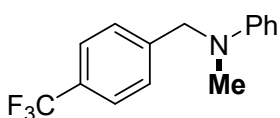

The typical procedure was applied to 4-(trifluoromethyl)benzaldehyde (87.1 mg, 0.5 mmol), aniline (46.6 mg, 0.5 mmol). Yield: 110.0 mg, 83 %, yellow oil;  $R_f = 0.3$  (PE/EtOAc = 20/1); purified by column chromatography eluting with PE/EtOAc (300:1);  $^1\text{H NMR}$  ( $\text{CDCl}_3$ , 400 MHz):  $\delta$  7.58 (d,  $J = 8.0$  Hz, 2H), 7.36 (d,  $J = 8.0$  Hz, 2H), 7.26-7.22 (m, 2H), 6.77-6.73 (m, 3H), 4.59 (s, 2H), 3.05 (s, 3H).  $^{13}\text{C}\{^1\text{H}\}$  NMR ( $\text{CDCl}_3$ , 100 MHz):  $\delta$  149.4, 143.3, 129.3, 129.2 (q,  $^2J_{\text{C-F}} = 21$  Hz), 126.9, 125.5 (q,  $^3J_{\text{C-F}} = 4$  Hz), 124.2 (q,  $^1J_{\text{C-F}} = 261$  Hz), 117.0, 112.4, 56.4, 38.7. The physical and spectral data were consistent with those previously reported.<sup>12</sup>

#### **4-((Methyl(phenyl)amino)methyl)benzonitrile (34)**

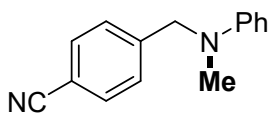

The typical procedure was applied to 4-formylbenzonitrile (66.0 mg, 0.5 mmol), aniline (46.6 mg, 0.5 mmol). Yield: 88.0 mg, 79 %, yellow oil;  $R_f = 0.2$  (PE/EtOAc = 10/1); purified by column chromatography eluting with PE/EtOAc (100:1);  $^1\text{H NMR}$  ( $\text{CDCl}_3$ , 400 MHz):  $\delta$  7.61 (d,  $J = 8.0$  Hz, 2H), 7.36 (d,  $J = 8.0$  Hz, 2H), 7.27-7.23 (m, 2H), 6.79-6.77 (m, 1H), 6.75-6.71 (m, 2H), 4.59 (s, 2H), 3.06 (s, 3H).  $^{13}\text{C}\{^1\text{H}\}$  NMR ( $\text{CDCl}_3$ , 100 MHz):  $\delta$  149.1, 144.9, 132.4, 129.2, 127.3, 118.8, 117.1, 112.3, 110.7, 56.5, 38.8. The physical and spectral data were consistent with those previously reported.<sup>13</sup>

#### ***N*-Methyl-*N*-(4-nitrobenzyl)aniline (35)**

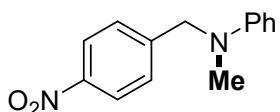

The typical procedure was applied to 4-nitrobenzaldehyde (76.0 mg, 0.5 mmol), aniline (46.6 mg, 0.5 mmol). Yield: 97.0 mg, 80

%, yellow oil;  $R_f = 0.3$  (PE/EtOAc = 20/1); purified by column chromatography eluting with PE/EtOAc (200:1);  $^1\text{H NMR}$  ( $\text{CDCl}_3$ , 400 MHz):  $\delta$  8.22 (d,  $J = 8.2$  Hz, 2H), 7.44 (d,  $J = 8.0$  Hz, 2H), 7.29 (d,  $J = 8.0$  Hz, 2H), 6.82-6.79 (m, 1H), 6.76 (d,  $J = 8.2$  Hz, 2H), 4.66 (s, 2H), 3.11 (s, 3H).  $^{13}\text{C}\{^1\text{H}\}$  NMR ( $\text{CDCl}_3$ , 100 MHz):  $\delta$  149.1, 147.2, 147.1, 129.3, 127.3, 123.9, 117.3, 112.4, 56.5, 38.9. The physical and spectral data were consistent with those previously reported.<sup>14</sup>

#### 4-((Methyl(phenyl)amino)methyl)phenol (36)

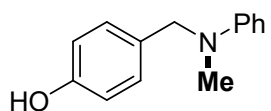

The typical procedure was applied to 4-hydroxybenzaldehyde (61.0 mg, 0.5 mmol), aniline (46.6 mg, 0.5 mmol). Yield: 86.4 mg, 81 %, yellow oil;  $R_f = 0.5$  (PE/EtOAc = 5/1); purified by column chromatography eluting with PE/EtOAc (100:1);  $^1\text{H NMR}$  ( $\text{CDCl}_3$ , 400 MHz):  $\delta$  7.27-7.23 (m, 2H), 7.11 (d,  $J = 9.0$  Hz, 2H), 6.79 (d,  $J = 9.0$  Hz, 2H), 6.77-6.75 (m, 3H), 5.06 (br, 1H), 4.47 (s, 2H), 2.99 (s, 3H).  $^{13}\text{C}\{^1\text{H}\}$  NMR ( $\text{CDCl}_3$ , 100 MHz):  $\delta$  154.4, 149.7, 130.9, 129.1, 128.2, 116.6, 115.3, 112.6, 56.1, 38.3. HRMS(ESI)  $m/z$ :  $[\text{M} + \text{H}]^+$  Calcd for  $\text{C}_{14}\text{H}_{16}\text{NO}$  214.1226; Found 214.1227; IR (KBr)  $\nu$  ( $\text{cm}^{-1}$ ): 3362, 3039, 2856, 1613, 1591, 1508, 1281, 983, 920, 901, 857, 838, 819, 809, 750, 710, 693, 657.

#### *N*-Methyl-*N*-(2,4,6-trimethylbenzyl)aniline (37)

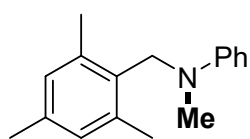

The typical procedure was applied to 2,4,6-trimethylbenzaldehyde (74.1 mg, 0.5 mmol), aniline (46.6 mg, 0.5 mmol). Yield: 97.0 mg, 81 %, yellow oil;  $R_f = 0.6$  (PE/EtOAc = 20/1); purified by column chromatography eluting with PE/EtOAc (200:1);  $^1\text{H NMR}$  ( $\text{CDCl}_3$ , 400 MHz):  $\delta$  7.39 (t,  $J = 7.9$  Hz, 2H), 7.01 (d,  $J = 8.1$  Hz, 2H), 6.98 (s, 2H), 6.87 (t,  $J = 7.2$  Hz, 1H), 4.42 (s, 2H), 2.68 (s, 3H), 2.38 (s, 9H).  $^{13}\text{C}\{^1\text{H}\}$  NMR ( $\text{CDCl}_3$ , 100 MHz):  $\delta$  150.7, 138.0, 136.8, 131.2, 129.1, 129.0, 116.9, 113.0, 48.7, 34.2, 20.9, 19.9. HRMS(ESI)  $m/z$ :  $[\text{M} + \text{H}]^+$  Calcd for  $\text{C}_{17}\text{H}_{22}\text{N}$  240.1752; Found 240.1750; IR (KBr)  $\nu$  ( $\text{cm}^{-1}$ ): 1617, 1590, 1521, 1452, 1356, 1247, 1111, 945, 803, 733, 700.

#### *N*-Methyl-*N*-(2-methylbenzyl)aniline (38)

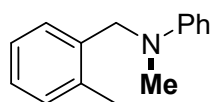

The typical procedure was applied to 2-methylbenzaldehyde (60.1 mg, 0.5 mmol), aniline (46.6 mg, 0.5 mmol). Yield: 98.3 mg, 93 %, yellow

oil;  $R_f = 0.5$  (PE/EtOAc = 20/1); purified by column chromatography eluting with PE/EtOAc (200:1);  $^1\text{H NMR}$  ( $\text{CDCl}_3$ , 400 MHz):  $\delta$  7.26-7.15 (m, 6H), 6.74-6.72 (m, 3H), 4.48 (s, 2H), 3.04 (s, 3H), 2.33 (s, 3H).  $^{13}\text{C}\{^1\text{H}\}$  NMR ( $\text{CDCl}_3$ , 100 MHz):  $\delta$  149.7, 136.2, 135.5, 130.2, 129.1, 126.7, 126.3, 126.0, 116.4, 112.1, 54.7, 38.3, 18.9. The physical and spectral data were consistent with those previously reported.<sup>11</sup>

#### ***N*-Methyl-*N*-(naphthalen-2-ylmethyl)aniline (39)**

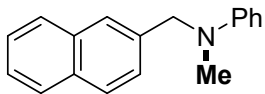 The typical procedure was applied to 2-naphthaldehyde (78.0 mg, 0.5 mmol), aniline (46.6 mg, 0.5 mmol). Yield: 117.0 mg, 95 %, yellow oil;  $R_f = 0.5$  (PE/EtOAc = 20/1); purified by column chromatography eluting with PE/EtOAc (200:1);  $^1\text{H NMR}$  ( $\text{CDCl}_3$ , 400 MHz):  $\delta$  7.91-7.89 (m, 3H), 7.78 (s, 1H), 7.56-7.55 (m, 2H), 7.49-7.47 (m, 1H), 7.38-7.33 (m, 2H), 6.93 (s, 2H), 6.88-6.84 (m, 1H), 4.76 (s, 2H), 3.16 (s, 3H).  $^{13}\text{C}\{^1\text{H}\}$  NMR ( $\text{CDCl}_3$ , 100 MHz):  $\delta$  149.8, 136.6, 133.5, 132.6, 129.2, 128.3, 127.7, 127.6, 126.0, 125.5, 125.1, 125.1, 116.6, 112.4, 56.9, 38.4. The physical and spectral data were consistent with those previously reported.<sup>11</sup>

#### ***N*-(Furan-2-ylmethyl)-*N*-methylaniline (40)**

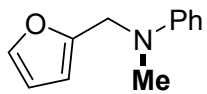 The typical procedure was applied to furan-2-carbaldehyde (48.0 mg, 0.5 mmol), aniline (46.6 mg, 0.5 mmol). Yield: 86.0 mg, 92 %, yellow oil;  $R_f = 0.4$  (PE/EtOAc = 20/1); purified by column chromatography eluting with PE/EtOAc (200:1);  $^1\text{H NMR}$  ( $\text{CDCl}_3$ , 400 MHz):  $\delta$  7.34 (s, 1H), 7.26-7.21 (m, 2H), 6.83 (d,  $J = 8.2$  Hz, 2H), 6.76-6.73 (m, 1H), 6.28 (s, 1H), 6.14 (s, 1H), 4.45 (s, 2H), 2.98 (s, 3H).  $^{13}\text{C}\{^1\text{H}\}$  NMR ( $\text{CDCl}_3$ , 100 MHz):  $\delta$  152.3, 149.3, 141.8, 129.0, 117.1, 113.0, 110.1, 107.2, 49.8, 38.2. The physical and spectral data were consistent with those previously reported.<sup>12</sup>

#### ***N*-Methyl-*N*-(thiophen-3-ylmethyl)aniline (41)**

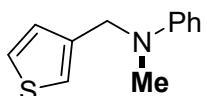 The typical procedure was applied to thiophene-3-carbaldehyde (56.1 mg, 0.5 mmol), aniline (46.6 mg, 0.5 mmol). Yield: 91.0 mg, 90 %, yellow oil;  $R_f = 0.6$  (PE/EtOAc = 20/1); purified by column chromatography eluting with PE/EtOAc (300:1);  $^1\text{H NMR}$  ( $\text{CDCl}_3$ , 400 MHz):  $\delta$  7.30-7.24 (m, 3H), 7.06 (s, 1H), 6.98 (d,  $J = 4.9$  Hz, 1H), 6.81 (d,  $J = 8.2$  Hz, 2H), 6.75 (t,  $J = 7.3$  Hz, 1H), 4.54 (s, 2H), 3.00 (s, 3H).  $^{13}\text{C}\{^1\text{H}\}$  NMR ( $\text{CDCl}_3$ , 100 MHz):  $\delta$  149.5, 139.9, 129.1, 126.8, 126.0, 121.2, 116.7, 112.7, 52.4, 38.2. HRMS(ESI)  $m/z$ :  $[\text{M} + \text{H}]^+$  Calcd for

C<sub>12</sub>H<sub>14</sub>NS 204.0841; Found 204.0838; IR (KBr)  $\nu$  (cm<sup>-1</sup>): 3107, 3089, 2933, 1598, 1536, 1493, 1387, 1189, 1127, 1088, 945, 874, 746.

#### ***N*-Methyl-*N*-phenethylaniline (42)**

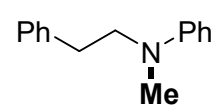 The typical procedure was applied to phenylacetaldehyde (60.1 mg, 0.5 mmol), aniline (46.6 mg, 0.5 mmol). Yield: 82.0 mg, 78 %, yellow oil;  $R_f$  = 0.8 (PE/EtOAc = 10/1); purified by column chromatography eluting with PE/EtOAc (200:1); <sup>1</sup>H NMR (CDCl<sub>3</sub>, 400 MHz):  $\delta$  7.33-7.20 (m, 7H), 6.75-6.69 (m, 3H), 3.57 (t,  $J$  = 7.3 Hz, 2H), 2.89 (s, 3H), 2.85 (t,  $J$  = 7.3 Hz, 2H). <sup>13</sup>C {<sup>1</sup>H} NMR (CDCl<sub>3</sub>, 100 MHz):  $\delta$  148.8, 139.8, 129.3, 128.8, 128.6, 126.2, 116.1, 112.2, 54.8, 38.5, 32.9. The physical and spectral data were consistent with those previously reported.<sup>15</sup>

#### ***N*-Methyl-*N*-undecylaniline (43)**

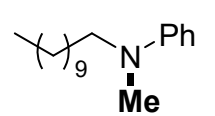 The typical procedure was applied to undecanal (85.1 mg, 0.5 mmol), aniline (46.6 mg, 0.5 mmol). Yield: 98.0 mg, 75 %, yellow oil;  $R_f$  = 0.5 (PE/EtOAc = 20/1); purified by column chromatography eluting with PE/EtOAc (300:1); <sup>1</sup>H NMR (CDCl<sub>3</sub>, 400 MHz):  $\delta$  7.26-7.21 (m, 2H), 6.73-6.69 (m, 3H), 3.31 (t,  $J$  = 6.7 Hz, 2H), 2.94 (s, 3H), 1.60-1.57 (m, 2H), 1.33-1.29 (m, 16H), 0.90 (t,  $J$  = 6.7 Hz, 3H). <sup>13</sup>C {<sup>1</sup>H} NMR (CDCl<sub>3</sub>, 100 MHz):  $\delta$  148.8, 129.2, 116.9, 112.6, 47.5, 37.7, 32.2, 31.9, 31.8, 30.1, 29.7, 29.4, 29.3, 26.8, 22.7, 14.1. The physical and spectral data were consistent with those previously reported.<sup>16</sup>

#### ***N,N*-Dimethylaniline (44)**

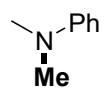 The typical procedure was applied to polyoxymethylene (30.0 mg, 0 mmol), aniline (46.6 mg, 0.5 mmol). Yield: 58.0 mg, 96 %, yellow oil;  $R_f$  = 0.8 (PE/EtOAc = 10/1); purified by column chromatography eluting with PE/EtOAc (300:1); <sup>1</sup>H NMR (CDCl<sub>3</sub>, 400 MHz):  $\delta$  7.47-7.41 (m, 2H), 6.95-6.91 (m, 3H), 3.11 (s, 6H). <sup>13</sup>C {<sup>1</sup>H} NMR (CDCl<sub>3</sub>, 100 MHz):  $\delta$  150.5, 128.9, 116.5, 112.5, 40.4. The physical and spectral data were consistent with those previously reported.<sup>3</sup>

## **2.2 General Procedure for the Reaction of Aldehydes**



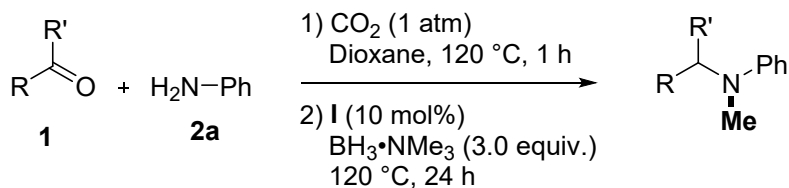

In a Schlenk tube was placed acetophenone (60.1 mg, 0.5 mmol), aniline (46.6 mg, 0.5 mmol), and dioxane (0.5 mL). The resulting mixture was stirred with a CO<sub>2</sub> balloon at 120 °C (heating block) for 1 h, then added BH<sub>3</sub>·NMe<sub>3</sub> (109.7 mg, 1.5 mmol) and 2-aminothiazole (5.0 mg, 0.05 mmol). The resulting mixture was stirred at 120 °C (heating block) for 24 h, and then allowed to room temperature. The reaction was quenched by brine (1 mL). The aqueous layer was extracted with EtOAc (2 mL x 3). The combined organic layers were dried over MgSO<sub>4</sub> and concentrated under reduced pressure. The crude product was purified by column chromatography (silica gel, EtOAc/PE =300/1) to afford *N*-Methyl-*N*-(1-phenylethyl)aniline (**45**) in 86% (90.9 mg) as a yellow oil.

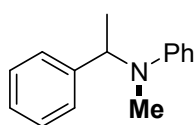

<sup>1</sup>H NMR (CDCl<sub>3</sub>, 400 MHz): δ 7.29-7.26 (m, 4H), 7.21-7.17 (m, 3H), 6.79-6.77 (m, 2H), 6.69-6.65 (m, 1H), 5.07 (q, *J* = 6.8 Hz, 1H), 2.62 (s, 3H), 1.49 (d, *J* = 6.7 Hz, 3H). <sup>13</sup>C{<sup>1</sup>H} NMR (CDCl<sub>3</sub>, 100 MHz): δ 147.3,

145.2, 129.1, 128.6, 126.8, 125.8, 117.2, 113.3, 53.4, 29.7, 25.0. The physical and spectral data were consistent with those previously reported.<sup>2</sup>

#### *N*-Methyl-*N*-(1-(*p*-tolyl)ethyl)aniline (**46**)

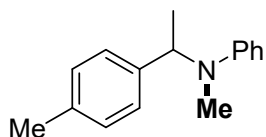

The typical procedure was applied to 1-(*p*-tolyl)ethan-1-one (67.0 mg, 0.5 mmol), aniline (46.6 mg, 0.5 mmol). Yield: 87.0 mg, 77 %, yellow oil; *R*<sub>f</sub> = 0.6 (PE/EtOAc = 10/1); purified by column

chromatography eluting with PE/EtOAc (200:1); <sup>1</sup>H NMR (CDCl<sub>3</sub>, 400 MHz): δ 7.27 (d, *J* = 7.5 Hz, 2H), 7.15-7.08 (m, 4H), 6.67-6.63 (m, 1H), 6.53 (d, *J* = 7.5 Hz, 2H), 4.47 (q, *J* = 6.7 Hz, 1H), 2.33 (s, 3H), 1.51 (d, *J* = 6.7 Hz, 3H). <sup>13</sup>C{<sup>1</sup>H} NMR (CDCl<sub>3</sub>, 100 MHz): δ 147.3, 142.2, 136.4, 129.3, 129.1, 125.7, 117.2, 113.3, 53.1, 48.1, 25.0, 21.0. The physical and spectral data were consistent with those previously reported.<sup>2</sup>

#### *N*-(1-(4-Methoxyphenyl)ethyl)-*N*-methylaniline (**47**)

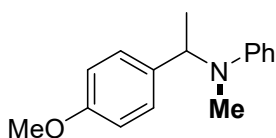

The typical procedure was applied to 1-(4-methoxyphenyl)ethan-1-one (75.1 mg, 0.5 mmol), aniline (46.6 mg, 0.5 mmol). Yield:

99.0 mg, 82 %, yellow oil;  $R_f = 0.6$  (PE/EtOAc = 10/1); purified by column chromatography eluting with PE/EtOAc (200:1);  $^1\text{H}$  NMR ( $\text{CDCl}_3$ , 400 MHz):  $\delta$  7.66-7.61 (m, 4H), 7.26-7.23 (m, 4H), 7.12 (t,  $J = 7.5$  Hz, 1H), 5.48 (q,  $J = 6.7$  Hz, 1H), 4.19 (s, 3H), 3.03 (s, 3H), 1.90 (d,  $J = 6.7$  Hz, 3H).  $^{13}\text{C}\{^1\text{H}\}$  NMR ( $\text{CDCl}_3$ , 100 MHz):  $\delta$  158.5, 129.2, 128.1, 116.7, 113.7, 113.5, 113.3, 113.2, 56.0, 55.3, 31.7, 16.3. The physical and spectral data were consistent with those previously reported.<sup>17</sup>

#### ***N*-Methyl-*N*-(1-(4-nitrophenyl)ethyl)aniline (48)**

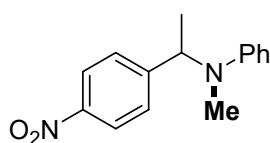

The typical procedure was applied to 1-(4-nitrophenyl)ethan-1-one (82.5 mg, 0.5 mmol), aniline (46.6 mg, 0.5 mmol). Yield: 109.0 mg, 85 %, yellow oil;  $R_f = 0.5$  (PE/EtOAc = 20/1); purified by column chromatography eluting with PE/EtOAc (200:1);  $^1\text{H}$  NMR ( $\text{CDCl}_3$ , 400 MHz):  $\delta$  8.18 (d,  $J = 8.5$  Hz, 2H), 7.48 (d,  $J = 8.5$  Hz, 2H), 7.26 (t,  $J = 6.7$  Hz, 2H), 8.18 (d,  $J = 8.5$  Hz, 2H), 6.78 (t,  $J = 6.7$  Hz, 1H), 5.14 (q,  $J = 6.7$  Hz, 1H), 2.72 (s, 3H), 1.60 (d,  $J = 6.7$  Hz, 3H).  $^{13}\text{C}\{^1\text{H}\}$  NMR ( $\text{CDCl}_3$ , 100 MHz):  $\delta$  161.7, 152.7, 140.2, 136.3, 129.1, 126.9, 126.3, 113.2, 53.4, 46.1, 20.9. The physical and spectral data were consistent with those previously reported.<sup>17</sup>

#### **4-(1-(Methyl(phenyl)amino)ethyl)benzonitrile (49)**

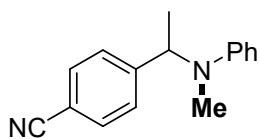

The typical procedure was applied to 4-acetylbenzonitrile (73.0 mg, 0.5 mmol), aniline (46.6 mg, 0.5 mmol). Yield: 96.9 mg, 82 %, yellow oil;  $R_f = 0.4$  (PE/EtOAc = 10/1); purified by column chromatography eluting with PE/EtOAc (200:1);  $^1\text{H}$  NMR ( $\text{CDCl}_3$ , 400 MHz):  $\delta$  7.62 (d,  $J = 8.4$  Hz, 2H), 7.43 (d,  $J = 8.4$  Hz, 2H), 7.28-7.24 (m, 2H), 6.83-6.76 (m, 3H), 5.14-5.09 (q,  $J = 6.7$  Hz, 1H), 2.70 (s, 3H), 1.58 (d,  $J = 6.9$  Hz, 3H).  $^{13}\text{C}\{^1\text{H}\}$  NMR ( $\text{CDCl}_3$ , 100 MHz):  $\delta$  149.8, 148.8, 132.3, 129.4, 127.6, 118.9, 117.5, 113.4, 110.8, 56.9, 32.2, 16.5. The physical and spectral data were consistent with those previously reported.<sup>18</sup>

#### ***N*-Methyl-*N*-(1-(naphthalen-2-yl)ethyl)aniline (50)**

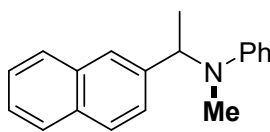

The typical procedure was applied to 1-(naphthalen-2-yl)ethan-1-one (85.0 mg, 0.5 mmol), aniline (46.6 mg, 0.5 mmol). Yield: 106.0 mg, 81 %, yellow solid;  $R_f = 0.6$  (PE/EtOAc = 5/1); purified by column chromatography eluting with PE/EtOAc (200:1);  $^1\text{H}$  NMR ( $\text{CDCl}_3$ , 400 MHz):

$\delta$  7.84-7.81 (m, 2H), 7.77 (d,  $J$  = 13.5 Hz, 2H), 7.48-7.45 (m, 3H), 7.30-7.26 (m, 3H), 6.91 (d,  $J$  = 8.3 Hz, 1H), 6.76 (t,  $J$  = 7.2 Hz, 1H), 5.29 (q,  $J$  = 6.7 Hz, 1H), 2.70 (s, 3H), 1.66 (d,  $J$  = 6.8 Hz, 3H).  $^{13}\text{C}\{^1\text{H}\}$  NMR ( $\text{CDCl}_3$ , 100 MHz):  $\delta$  150.2, 140.4, 133.3, 132.5, 129.2, 128.0, 127.9, 127.5, 126.0, 125.9, 125.7, 124.9, 116.7, 113.0, 56.5, 31.8, 15.9. The physical and spectral data were consistent with those previously reported.<sup>2</sup>

### ***N*-Methyl-*N*-phenyl-2,3-dihydro-1*H*-inden-2-amine (51)**

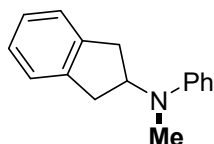

The typical procedure was applied to 1,3-dihydro-2*H*-inden-2-one (66.0 mg, 0.5 mmol), aniline (46.6 mg, 0.5 mmol). Yield: 97.1 mg, 87 %, yellow oil;  $R_f$  = 0.6 (PE/EtOAc = 10/1); purified by column chromatography eluting with PE/EtOAc (200:1);  $^1\text{H}$  NMR ( $\text{CDCl}_3$ , 400 MHz):  $\delta$  7.28-7.22 (m, 4H), 7.18-7.16 (m, 2H), 6.89 (d,  $J$  = 8.2 Hz, 2H), 6.77 (t,  $J$  = 7.2 Hz, 1H), 4.82-4.75 (m, 1H), 3.19 (dd,  $J$  = 16.3, 8.1 Hz, 2H), 3.06 (dd,  $J$  = 16.3, 8.1 Hz, 2H), 2.77 (s, 3H).  $^{13}\text{C}\{^1\text{H}\}$  NMR ( $\text{CDCl}_3$ , 100 MHz):  $\delta$  153.8, 149.3, 139.8, 128.0, 127.8, 126.5, 106.2, 55.7, 38.5, 35.6. The physical and spectral data were consistent with those previously reported.<sup>19</sup>

### ***N*-Cyclopentyl-*N*-methylaniline (52)**

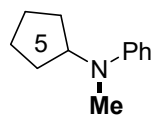

The typical procedure was applied to cyclopentanone (42.0 mg, 0.5 mmol), aniline (46.6 mg, 0.5 mmol). Yield: 78.9 mg, 90 %, yellow oil;  $R_f$  = 0.4 (PE/EtOAc = 10/1); purified by column chromatography eluting with PE/EtOAc (200:1);  $^1\text{H}$  NMR ( $\text{CDCl}_3$ , 400 MHz):  $\delta$  7.30-7.25 (t,  $J$  = 7.2 Hz, 2H), 6.88 (d,  $J$  = 8.2 Hz, 2H), 6.78-6.74 (t,  $J$  = 7.2 Hz, 1H), 4.25-4.17 (m, 1H), 2.84 (s, 3H), 1.95-1.90 (m, 2H), 1.82-1.72 (m, 2H), 1.68-1.60 (m, 4H).  $^{13}\text{C}\{^1\text{H}\}$  NMR ( $\text{CDCl}_3$ , 100 MHz):  $\delta$  151.1, 129.1, 116.8, 114.0, 60.3, 32.6, 28.7, 24.4. The physical and spectral data were consistent with those previously reported.<sup>19</sup>

### ***N*-Cyclohexyl-*N*-methylaniline (53)**

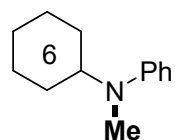

The typical procedure was applied to cyclohexanone (49.1 mg, 0.5 mmol), aniline (46.6 mg, 0.5 mmol). Yield: 87.0 mg, 92 %, yellow oil;  $R_f$  = 0.6 (PE/EtOAc = 20/1); purified by column chromatography eluting with PE/EtOAc (200:1);  $^1\text{H}$  NMR ( $\text{CDCl}_3$ , 400 MHz):  $\delta$  7.22 (t,  $J$  = 7.7 Hz, 2H), 6.78 (d,  $J$  = 8.1 Hz, 2H), 6.68 (t,  $J$  = 7.2 Hz, 1H), 3.59-3.53 (m, 1H), 2.78 (s, 3H), 1.86-1.70 (m,

5H), 1.50–1.31 (m, 4H), 1.19-1.09 (m, 1H).  $^{13}\text{C}\{^1\text{H}\}$  NMR ( $\text{CDCl}_3$ , 100 MHz):  $\delta$  147.3, 129.2, 116.8, 113.1, 51.6, 33.4, 30.0, 25.9, 25.0. The physical and spectral data were consistent with those previously reported.<sup>19</sup>

#### ***N*-Methyl-*N*-phenylcycloheptanamine (54)**

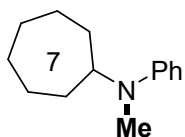

The typical procedure was applied to cycloheptanone (56.0 mg, 0.5 mmol), aniline (46.6 mg, 0.5 mmol). Yield: 93.5 mg, 92 %, yellow oil;  $R_f$  = 0.6 (PE/EtOAc = 10/1); purified by column chromatography eluting with PE/EtOAc (200:1);  $^1\text{H}$  NMR ( $\text{CDCl}_3$ , 400 MHz):  $\delta$  7.26 (t,  $J$  = 7.2 Hz, 2H), 6.80 (d,  $J$  = 8.0 Hz, 2H), 6.72 (t,  $J$  = 7.2 Hz, 1H), 3.83-3.79 (m, 1H), 2.79 (s, 3H), 1.90-1.87 (m, 2H), 1.78-1.65 (m, 6H), 1.62-1.49 (m, 4H).  $^{13}\text{C}\{^1\text{H}\}$  NMR ( $\text{CDCl}_3$ , 100 MHz):  $\delta$  150.1, 129.2, 116.2, 113.1, 59.8, 32.1, 31.4, 27.8, 25.7. The physical and spectral data were consistent with those previously reported.<sup>19</sup>

#### ***N*-Methyl-*N*-phenylcyclooctanamine (55)**

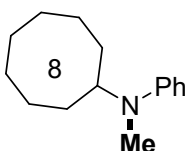

The typical procedure was applied to cyclooctanone (63.0 mg, 0.5 mmol), aniline (46.6 mg, 0.5 mmol). Yield: 90.2 mg, 83 %, yellow oil;  $R_f$  = 0.6 (PE/EtOAc = 10/1); purified by column chromatography eluting with PE/EtOAc (300:1);  $^1\text{H}$  NMR ( $\text{CDCl}_3$ , 400 MHz):  $\delta$  7.20-7.11 (m, 2H), 6.73-6.59 (m, 3H), 2.93 (s, 3H), 2.78-2.71 (m, 1H), 1.64-1.55 (m, 2H), 1.08-1.03 (m, 2H), 0.90-0.84 (m, 2H), 0.59-0.54 (m, 2H), 0.42-0.33 (m, 4H), 0.23-0.19 (m, 2H).  $^{13}\text{C}\{^1\text{H}\}$  NMR ( $\text{CDCl}_3$ , 100 MHz):  $\delta$  150.0, 129.2, 116.0, 112.9, 58.1, 31.6, 31.4, 26.6, 26.5, 25.5. HRMS(ESI)  $m/z$ :  $[M + H]^+$  Calcd for  $\text{C}_{15}\text{H}_{24}\text{N}$  218.1903; Found 218.1906; IR (KBr)  $\nu$  ( $\text{cm}^{-1}$ ): 2933, 2921, 1617, 1590, 1521, 1483, 1364, 1297, 1260, 1175, 1088, 956, 854, 725, 691.

#### ***N*-Methyl-*N*-phenylcyclododecanamine (56)**

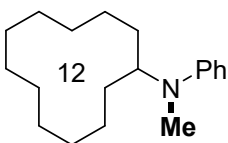

The typical procedure was applied to cyclododecanone (91.0 mg, 0.5 mmol), aniline (46.6 mg, 0.5 mmol). Yield: 106.6 mg, 79 %, yellow oil;  $R_f$  = 0.8 (PE/EtOAc = 10/1); purified by column chromatography eluting with PE/EtOAc (300:1);  $^1\text{H}$  NMR ( $\text{CDCl}_3$ , 400 MHz):  $\delta$  7.23 (t,  $J$  = 7.9 Hz, 2H), 6.78 (d,  $J$  = 8.2 Hz, 2H), 6.67 (t,  $J$  = 7.1 Hz, 1H), 3.98-3.91 (m, 1H), 2.73 (s, 3H), 1.71-1.66 (m, 2H), 1.48-1.35 (m, 20H).  $^{13}\text{C}\{^1\text{H}\}$  NMR ( $\text{CDCl}_3$ , 100 MHz):  $\delta$  150.9, 129.1, 115.8, 112.6, 53.4, 30.9, 27.6, 24.1, 24.0, 23.2, 22.7, 22.6. HRMS(ESI)  $m/z$ :

[M + Na]<sup>+</sup> Calcd for C<sub>19</sub>H<sub>31</sub>NNa 296.2349; Found 296.2355; IR (KBr)  $\nu$  (cm<sup>-1</sup>): 2933, 2921, 1617, 1590, 1521, 1472, 1355, 1280, 1166, 1070, 946, 822, 710, 690.

### ***N*-(Heptan-2-yl)-*N*-methylaniline (57)**

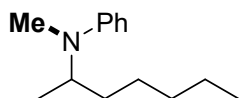

The typical procedure was applied to heptan-2-one (57.0 mg, 0.5 mmol), aniline (46.6 mg, 0.5 mmol). Yield: 67.8 mg, 66 %, yellow oil;  $R_f$  = 0.8 (PE/EtOAc = 10/1); purified by column chromatography eluting with PE/EtOAc (300:1); <sup>1</sup>H NMR (CDCl<sub>3</sub>, 400 MHz):  $\delta$  7.30-7.26 (m, 2H), 6.83 (d,  $J$  = 8.2 Hz, 2H), 6.73 (t,  $J$  = 7.2 Hz, 1H), 3.99-3.91 (m, 1H), 2.76 (s, 3H), 1.68-1.61 (m, 2H), 1.52-1.45 (m, 2H), 1.36-1.33 (m, 4H), 1.16 (d,  $J$  = 6.6 Hz, 3H), 0.94-0.91 (m, 3H). <sup>13</sup>C{<sup>1</sup>H} NMR (CDCl<sub>3</sub>, 100 MHz):  $\delta$  150.6, 129.1, 116.0, 112.9, 53.3, 34.6, 31.9, 29.8, 26.6, 22.7, 17.1, 14.1. HRMS(ESI)  $m/z$ : [M + H]<sup>+</sup> Calcd for C<sub>14</sub>H<sub>24</sub>N 206.1903; Found 206.1904; IR (KBr)  $\nu$  (cm<sup>-1</sup>): 1600, 1570, 1505, 1489, 1247, 945, 813, 732, 690.

### ***N*-(4-(Tert-butyl)benzyl)-*N*-methyl-1-(naphthalen-1-yl)methanamine (Butenafine) (58)**

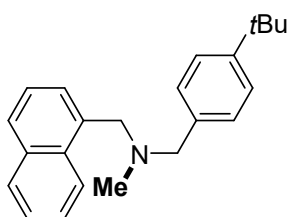

The typical procedure was applied to 4-(*tert*-butyl)benzaldehyde (811.0 mg, 5 mmol), naphthalen-1-ylmethanamine (786.0 mg, 5 mmol). Yield: 1.43 g, 90 %, yellow oil;  $R_f$  = 0.5 (PE/EtOAc = 10/1); purified by column chromatography eluting with PE/EtOAc (200:1); <sup>1</sup>H NMR (CDCl<sub>3</sub>, 400 MHz):  $\delta$  8.18-8.16 (m, 1H), 7.77-7.75 (m, 1H), 7.70-7.68 (m, 1H), 7.44-7.15 (m, 8H), 3.86 (s, 2H), 3.51 (s, 2H), 2.14 (s, 3H), 1.25 (s, 9H). <sup>13</sup>C{<sup>1</sup>H} NMR (CDCl<sub>3</sub>, 100 MHz):  $\delta$  149.9, 136.4, 135.2, 134.0, 132.6, 128.8, 128.4, 127.9, 127.4, 125.7, 125.6, 125.1, 125.1, 125.0, 62.1, 60.5, 42.4, 34.5, 31.5. The physical and spectral data were consistent with those previously reported.<sup>2</sup>

### **2-(Methyl(4-nitrobenzyl)amino)-2-(4-octylphenethyl)propane-1,3-diol (59)**

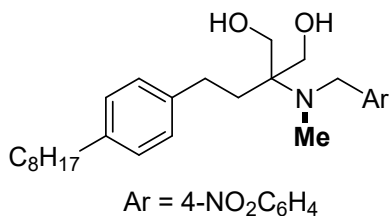

The typical procedure was applied to 4-nitrobenzaldehyde (46.0 mg, 0.3 mmol), 2-amino-2-(4-octylphenethyl)propane-1,3-diol (Fingolimod) (92.0 mg, 0.3 mmol). Yield: 95.4 mg, 80 %, yellow oil;  $R_f$  = 0.5 (PE/EtOAc = 1/1); purified by column chromatography eluting with PE/EtOAc (10:1); <sup>1</sup>H NMR (CDCl<sub>3</sub>, 400 MHz):  $\delta$  8.15 (d,  $J$  = 6.7 Hz, 2H),

7.53 (d,  $J = 6.7$  Hz, 2H), 7.09 (sr, 4H), 3.82 (s, 2H), 3.66 (s, 3H), 2.65-2.61 (m, 5H), 2.56 (t,  $J = 8.2$  Hz, 2H), 1.74-1.70 (m, 2H), 1.61-1.54 (m, 2H), 1.30-1.27 (m, 11H), 0.88 (t,  $J = 8.2$  Hz, 3H).  $^{13}\text{C}\{^1\text{H}\}$  NMR ( $\text{CDCl}_3$ , 100 MHz):  $\delta$  148.0, 147.0, 140.7, 139.0, 128.8, 128.5, 127.9, 123.6, 65.2, 63.7, 59.2, 54.3, 44.9, 35.5, 33.1, 31.8, 31.5, 29.4, 29.3, 29.2, 28.8, 22.6, 14.0. HRMS(ESI)  $m/z$ :  $[\text{M} + \text{Na}]^+$  Calcd for  $\text{C}_{27}\text{H}_{40}\text{N}_2\text{O}_4\text{Na}$  479.2880; Found 479.2884; IR (KBr)  $\nu$  ( $\text{cm}^{-1}$ ): 3435, 3351, 2926, 2854, 1524, 1513, 1466, 1348, 1018, 965, 920.

**(8*R*,9*S*,13*S*,14*S*)-13-Methyl-17-(methyl(phenyl)amino)-7,8,9,11,12,13,14,15,16,17-decahydro-6*H*-cyclopenta[*a*]phenanthren-3-ol (60)**

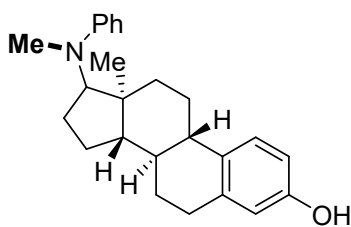

The typical procedure was applied to (8*R*,9*S*,13*S*,14*S*)-3-hydroxy-13-methyl-6,7,8,9,11,12,13,14,15,16-decahydro-17*H*-cyclopenta[*a*]phenanthren-17-one (Estrone) (81.0 mg, 0.3 mmol), aniline (28.0 mg, 0.3 mmol). Yield: 86.8 mg, 80 %, yellow oil;  $R_f = 0.4$  (PE/EtOAc = 5/1); purified by column chromatography eluting with PE/EtOAc (50:1);  $^1\text{H}$  NMR ( $\text{CDCl}_3$ , 400 MHz):  $\delta$  7.17-7.13 (m, 4H), 6.67-6.65 (m, 3H), 6.56 (s, 1H), 3.50 (t,  $J = 8.2$  Hz, 1H), 2.82 (br, 1H), 2.27-2.25 (m, 2H), 2.18 (s, 3H), 1.92-1.90 (m, 4H), 1.43-1.42 (m, 2H), 1.39-1.36 (m, 4H), 1.26 (s, 3H), 0.80 (s, 3H).  $^{13}\text{C}\{^1\text{H}\}$  NMR ( $\text{CDCl}_3$ , 100 MHz):  $\delta$  155.3, 148.5, 138.2, 132.6, 129.2, 126.5, 116.8, 115.2, 115.1, 113.2, 112.6, 63.6, 51.9, 43.9, 43.8, 39.0, 38.2, 30.0, 29.7, 29.6, 27.3, 26.4, 23.3, 14.1, 12.0. HRMS(ESI)  $m/z$ :  $[\text{M} + \text{K}]^+$  Calcd for  $\text{C}_{25}\text{H}_{31}\text{NOK}$  400.2037; Found 400.2034; IR (KBr)  $\nu$  ( $\text{cm}^{-1}$ ): 3327, 1718, 1619, 1581, 1498, 1356, 1247, 942, 793, 682.

**3. Mechanistic Studies:**

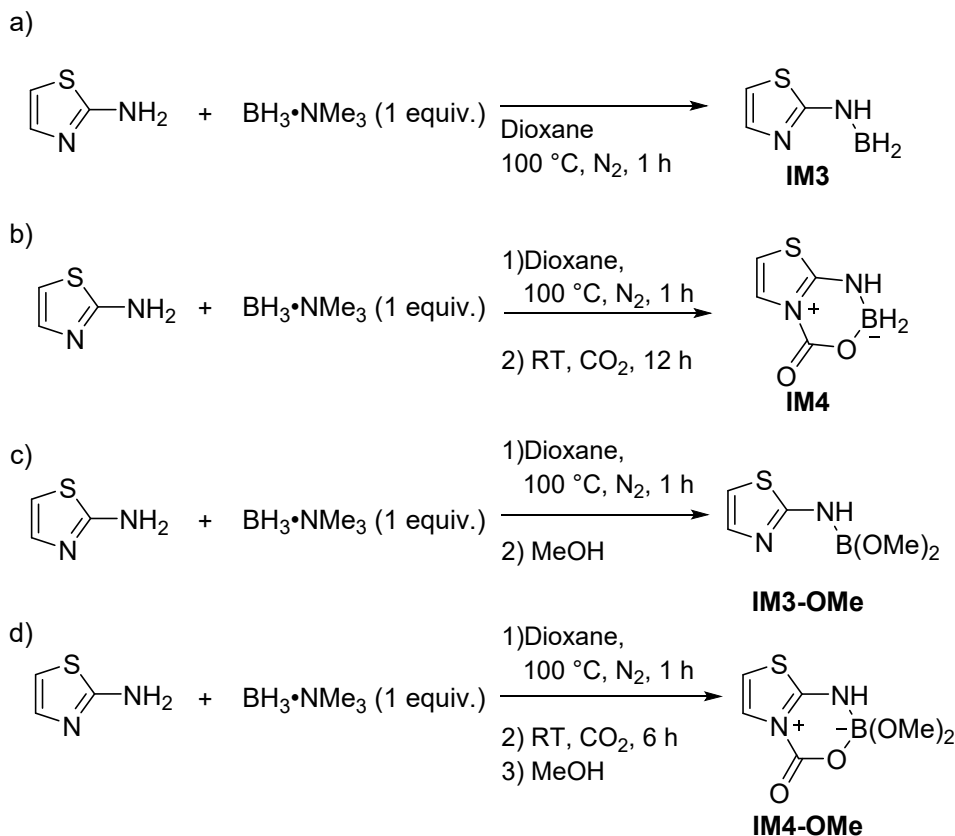

**Scheme S1.** HRMS experiments.

a) In a Schlenk tube was placed  $\text{BH}_3 \cdot \text{NMe}_3$  (14.7 mg, 0.2 mmol), 2-aminothiazole (20.0 mg, 0.2 mmol), dioxane (0.1 mL). The resulting mixture was stirred under  $\text{N}_2$  atmosphere at 100 °C (heating block) for 1 h, and then allowed to room temperature. The resulting mixture was added MeCN in glovebox for HRMS analysis.

b) In a Schlenk tube was placed  $\text{BH}_3 \cdot \text{NMe}_3$  (14.7 mg, 0.2 mmol), 2-aminothiazole (20.0 mg, 0.2 mmol), dioxane (0.1 mL). The resulting mixture was stirred under  $\text{N}_2$  atmosphere at 100 °C (heating block) for 1 h, and then the Schlenk tube was attached to a  $\text{CO}_2$  balloon at room temperature for 12 h. The resulting mixture was added dry MeCN in glovebox for HRMS analysis.

c) In a Schlenk tube was placed  $\text{BH}_3 \cdot \text{NMe}_3$  (14.7 mg, 0.2 mmol), 2-aminothiazole (20.0 mg, 0.2 mmol), dioxane (0.2 mL). The resulting mixture was stirred under  $\text{N}_2$  atmosphere at 100 °C (heating block) for 1 h, and then allowed to room temperature. Then MeOH (0.5 mL) was added. After stirred a few minutes, the resulting mixture was filtered.

The filtrate was concentrated to dryness to afford **Dimethyl thiazol-2-ylboramidate (IM3-OMe)** in 56% (19.2 mg) as a pale yellow solid.  $^1\text{H}$  NMR ( $\text{CDCl}_3$ , 400 MHz):  $\delta$  7.02 (d,  $J = 4.0$  Hz, 1H), 6.46 (d,  $J = 4.0$  Hz, 1H), 5.55 (br, 1H), 3.45 (s, 6H).  $^{13}\text{C}\{^1\text{H}\}$  NMR ( $\text{CDCl}_3$ , 100 MHz):  $\delta$  168.7, 138.4, 108.3, 51.1.  $^{11}\text{B}\{^1\text{H}\}$  NMR ( $\text{CDCl}_3$ , 128 MHz):  $\delta$  18.46. HRMS(ESI)  $m/z$ :  $[\text{M}+\text{H}]^+$  Calcd for  $\text{C}_5\text{H}_{10}\text{BN}_2\text{O}_2\text{S}$  172.0587; Found 172.0587.

d) In a Schlenk tube was placed  $\text{BH}_3\cdot\text{NMe}_3$  (14.7 mg, 0.2 mmol), 2-aminothiazole (20.0 mg, 0.2 mmol), dioxane (0.2 mL). The resulting mixture was stirred under  $\text{N}_2$  atmosphere at 100 °C (heating block) for 1 h, and then the Schlenk tube was attached to a  $\text{CO}_2$  balloon at room temperature for 6 h, and then allowed to room temperature. Then MeOH (0.5 mL) was added. After stirring for a few minutes, the resulting mixture was added to dry MeCN in the glovebox for HRMS analysis.

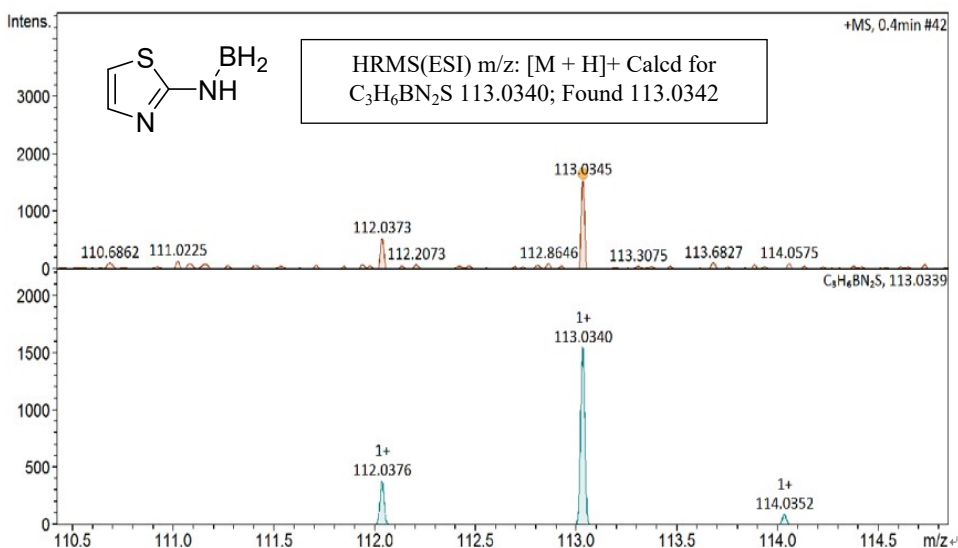



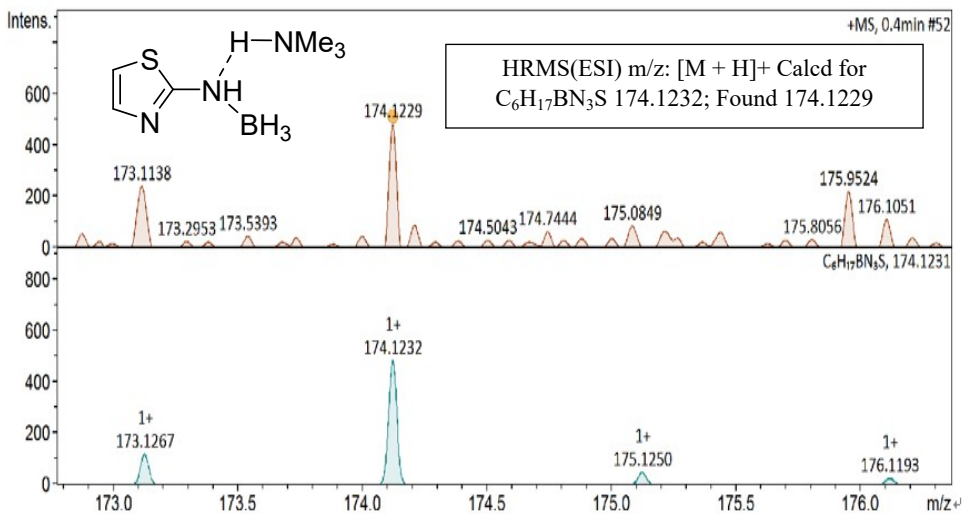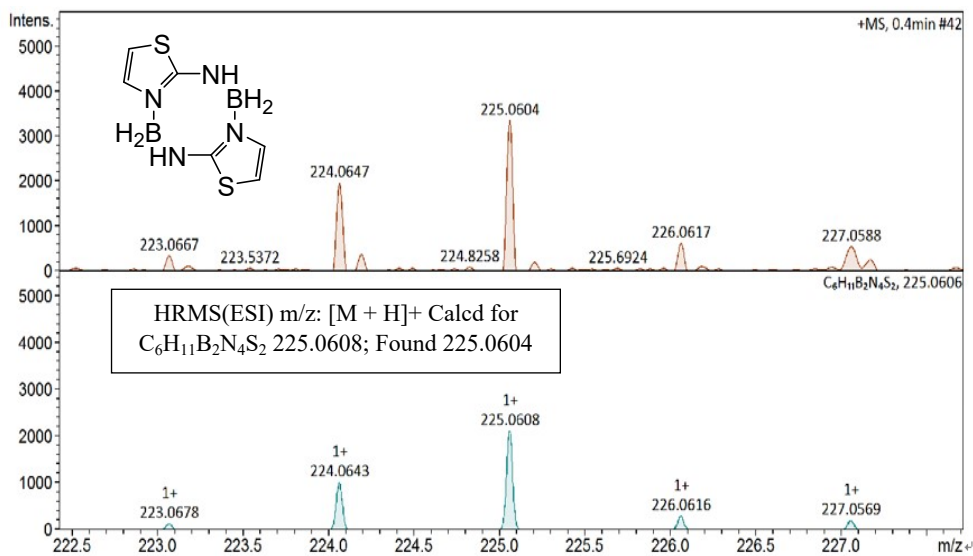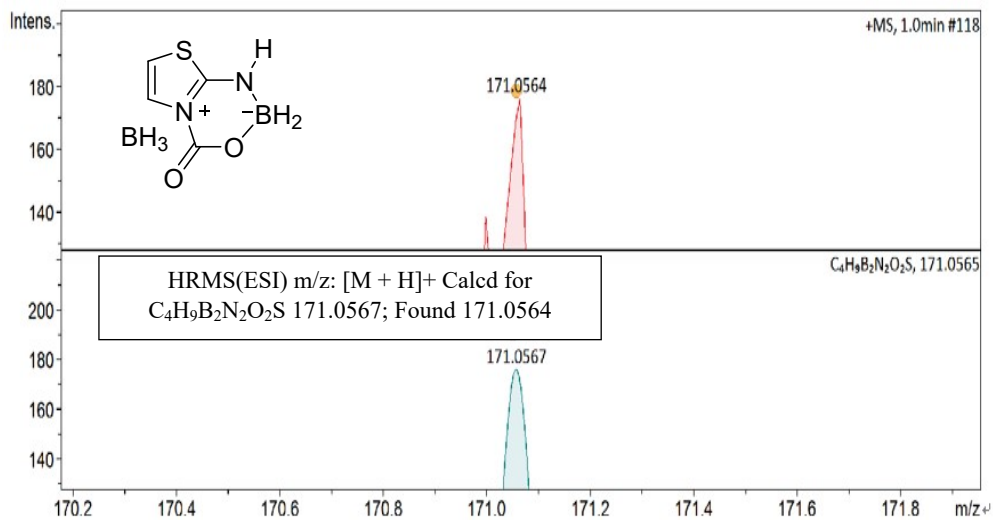

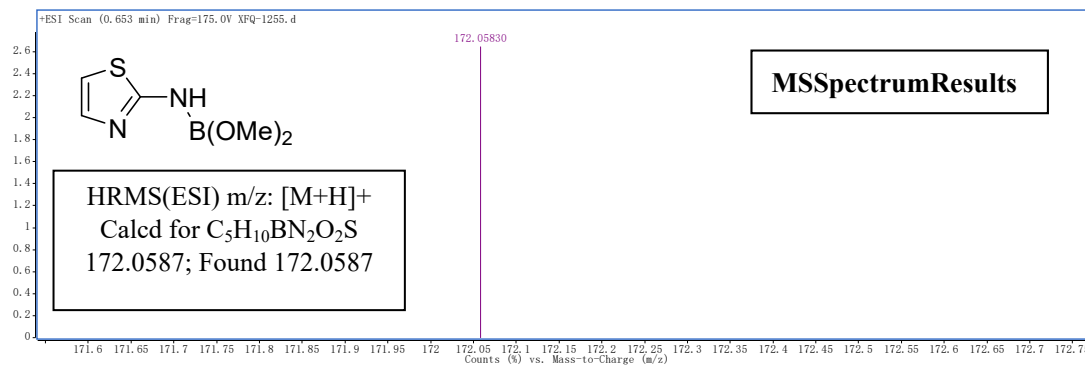

### FormulaCalculate

| Formula (M)            | Score (MFG) | Mass            | Mass (MFG)      | m/z (Calc)       | Diff (ppm)   | DBE      | m/z             |
|------------------------|-------------|-----------------|-----------------|------------------|--------------|----------|-----------------|
| <b>C5 H9 B N2 O2 S</b> | <b>100</b>  | <b>171.0514</b> | <b>171.0514</b> | <b>172.05869</b> | <b>-0.08</b> | <b>3</b> | <b>172.0587</b> |
| C13 H5 B               | 97.83       | 171.0514        | 171.0521        | 172.05934        | 3.73         | 12       | 172.0587        |
| C7 H9 N O4             | 86.15       | 171.0514        | 171.0532        | 172.06043        | 10.14        | 4        | 172.0587        |
| H9 N7 O2 S             | 76.77       | 171.0514        | 171.0538        | 172.06112        | 14.15        |          | 172.0587        |

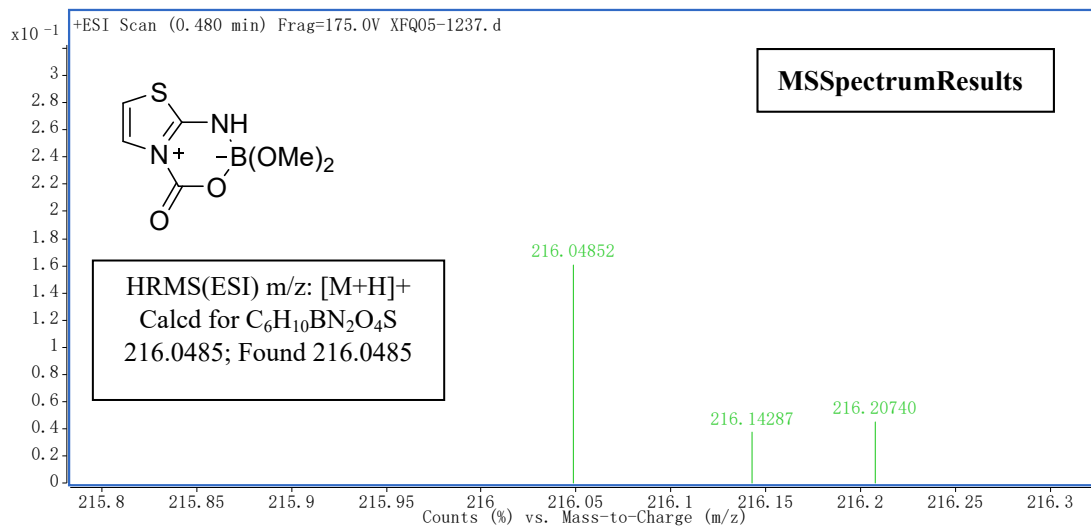

### FormulaCalculate

| Formula (M)            | Score (MFG) | Mass            | Mass (MFG)      | m/z (Calc)       | Diff (ppm)  | DBE      | m/z             |
|------------------------|-------------|-----------------|-----------------|------------------|-------------|----------|-----------------|
| <b>C6 H9 B N2 O4 S</b> | <b>100</b>  | <b>215.0412</b> | <b>215.0412</b> | <b>216.04852</b> | <b>0.07</b> | <b>4</b> | <b>216.0485</b> |
| C14 H5 B O2            | 97.97       | 215.0412        | 215.0419        | 216.04917        | 3.11        | 13       | 216.0485        |
| C12 H9 N O S           | 97.53       | 215.0412        | 215.0405        | 216.04776        | -3.44       | 9        | 216.0485        |
| C4 H13 N3 O3 S2        | 91.82       | 215.0412        | 215.0398        | 216.04711        | -6.47       | 0        | 216.0485        |
| C8 H9 N O6             | 87.56       | 215.0412        | 215.043         | 216.05026        | 8.2         | 5        | 216.0485        |
| C9 H13 N O S2          | 76.63       | 215.0412        | 215.0439        | 216.05113        | 12.24       | 4        | 216.0485        |
| C9 H5 N5 O2            | 71.05       | 215.0412        | 215.0443        | 216.0516         | 14.42       | 10       | 216.0485        |

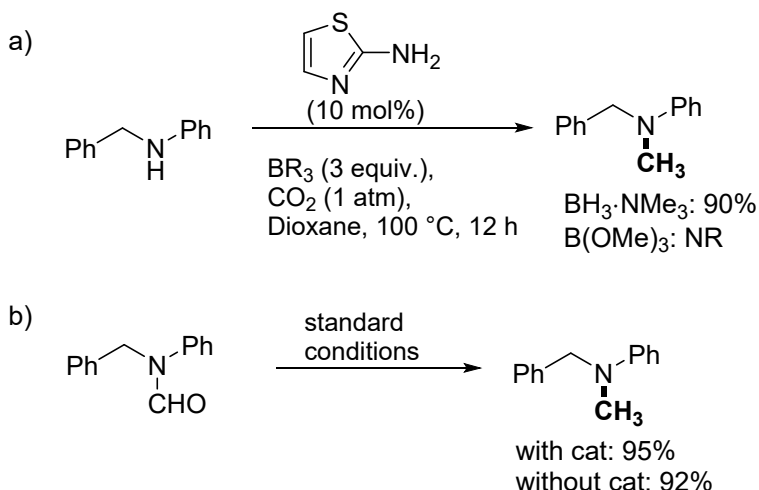

**Scheme S2.** Control experiments.

a) In a Schlenk tube was placed  $\text{BH}_3\cdot\text{NMe}_3$  (109.4 mg, 1.5 mmol) or  $\text{B(OMe)}_3$  (155.9 mg, 1.5 mmol), 2-aminothiazole (5.0 mg, 0.05 mmol), *N*-benzylaniline (91.6 mg, 0.5 mmol), dioxane (0.5 mL). The resulting mixture was stirred with a  $\text{CO}_2$  balloon at 100 °C (heating block) for 12 h, and then allowed to room temperature. The reaction was quenched by brine (1 mL). The aqueous layer was extracted with EtOAc (2 mL x 3). The combined organic layers were dried over  $\text{MgSO}_4$  and concentrated under reduced pressure. The yield was determined by  $^1\text{H}$  NMR with 1,1,2,2-tetrachloroethane as the internal standard.

b) In a Schlenk tube was placed *N*-benzyl-*N*-phenylformamide (105.6 mg, 0.5 mmol),  $\text{BH}_3\cdot\text{NMe}_3$  (109.7 mg, 1.5 mmol), 2-aminothiazole (5.0 mg, 0.05 mmol) or no catalyst, dioxane (0.5 mL). The resulting mixture was stirred with a  $\text{CO}_2$  balloon at 100 °C (heating block) for 12 h, and then allowed to room temperature. The reaction was quenched by brine (1 mL). The aqueous layer was extracted with EtOAc (2 mL x 3). The combined organic layers were dried over  $\text{MgSO}_4$  and concentrated under reduced pressure. The yield was determined by  $^1\text{H}$  NMR with 1,1,2,2-tetrachloroethane as the internal standard.

**Computational Methods:**

Density functional theory calculations were performed with the Gaussian 09 package<sup>21</sup>. Geometry optimizations and frequency calculations were performed at the B3LYP-D3(BJ)<sup>22,23</sup>/def2-SVP level in dioxane solution using the SMD solvation model,<sup>24</sup> in which the dispersion interaction correction D3(BJ) was added to the B3LYP functional to improve the computational accuracy. Frequency outcomes were examined to confirm stationary points as

minima (no imaginary frequencies) or transition states (only one imaginary frequency). Free energies (in kcal mol<sup>-1</sup>) were utilized in the discussion.

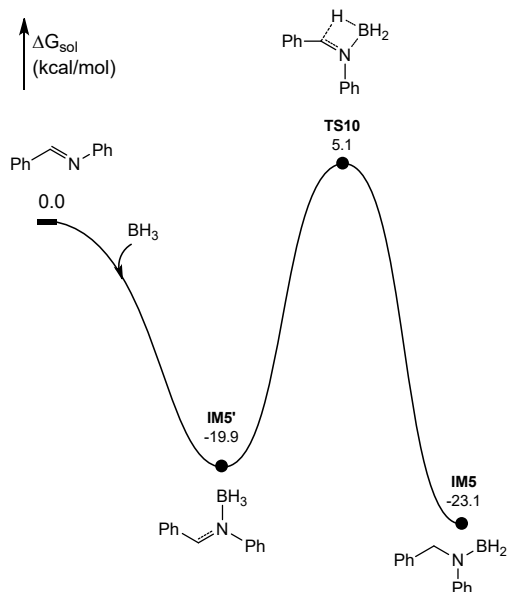

**Figure S1.** Free energy profile for the *in-situ*-generation of *N*-benzylideneaniline.

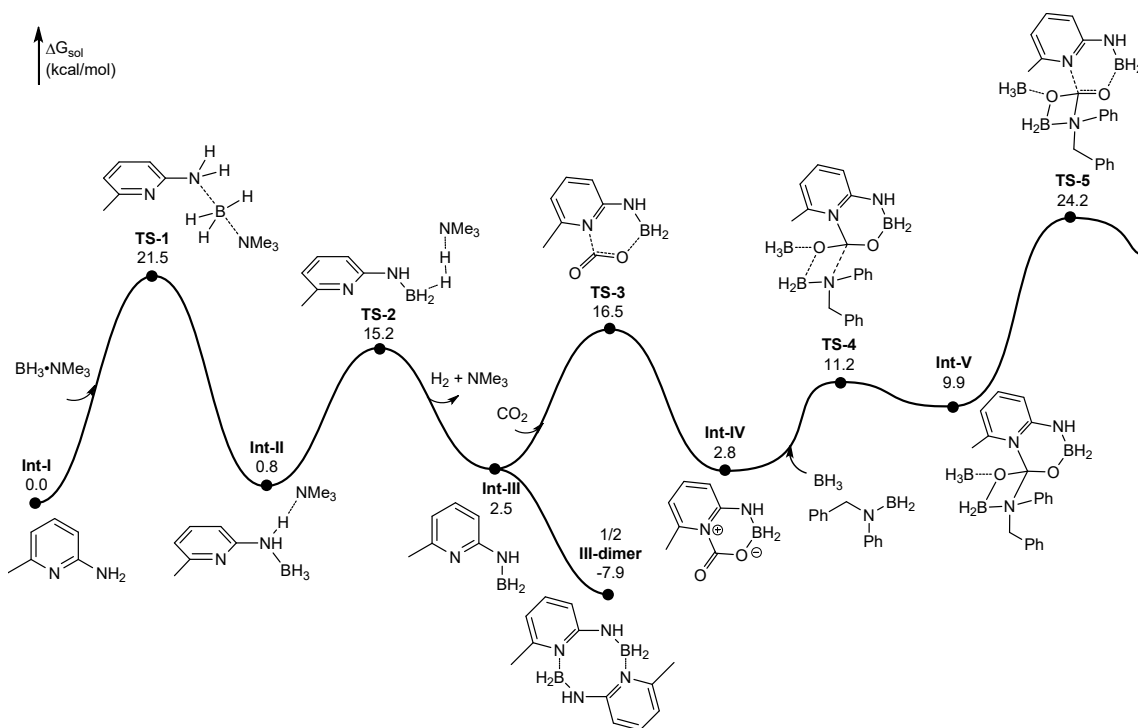

**Figure S2.** Free energy profile for the catalytic process by catalyst-II.

## Cartesian Coordinates (Å) for the Optimized Structures

### IM1 (1)

|   |           |           |           |
|---|-----------|-----------|-----------|
| C | 0.783935  | 0.220626  | -0.004412 |
| C | -1.216295 | 1.159407  | 0.003814  |
| C | -1.645161 | -0.135208 | 0.007876  |
| S | -0.263839 | -1.208623 | -0.004734 |
| H | -1.881942 | 2.025220  | 0.009821  |
| H | -2.661414 | -0.524309 | 0.020674  |
| N | 0.144348  | 1.356856  | 0.000926  |
| N | 2.141742  | 0.096957  | -0.060019 |
| H | 2.659157  | 0.948409  | 0.135671  |
| H | 2.568119  | -0.756994 | 0.279564  |

### BH<sub>3</sub>•NMe<sub>3</sub>

|   |           |           |           |
|---|-----------|-----------|-----------|
| B | 0.000000  | 0.000000  | 1.647928  |
| H | 1.018318  | 0.587926  | 1.992666  |
| H | -1.018318 | 0.587926  | 1.992666  |
| H | 0.000000  | -1.175852 | 1.992666  |
| N | 0.000000  | 0.000000  | 0.007816  |
| C | 0.000000  | 1.397128  | -0.490033 |
| H | -0.891862 | 1.912090  | -0.112810 |
| H | 0.891862  | 1.912090  | -0.112810 |
| H | 0.000000  | 1.412251  | -1.591632 |
| C | 1.209949  | -0.698564 | -0.490033 |
| H | 2.101850  | -0.183670 | -0.112810 |
| H | 1.209987  | -1.728420 | -0.112810 |
| H | 1.223045  | -0.706125 | -1.591632 |
| C | -1.209949 | -0.698564 | -0.490033 |
| H | -1.209987 | -1.728420 | -0.112810 |
| H | -2.101850 | -0.183670 | -0.112810 |
| H | -1.223045 | -0.706125 | -1.591632 |

### TS1

|   |          |          |           |
|---|----------|----------|-----------|
| C | 1.940963 | 0.705315 | -0.272485 |
| C | 3.555245 | 0.148080 | 1.120505  |

|   |           |           |           |
|---|-----------|-----------|-----------|
| C | 3.488943  | -1.034869 | 0.440911  |
| S | 2.242085  | -0.952168 | -0.769634 |
| H | 4.248773  | 0.355530  | 1.937217  |
| H | 4.085242  | -1.935888 | 0.574599  |
| N | 2.680711  | 1.125709  | 0.708525  |
| N | 0.898019  | 1.444558  | -0.833743 |
| H | 0.923732  | 2.406797  | -0.493973 |
| H | 0.876118  | 1.432264  | -1.852951 |
| B | -0.974153 | 0.719874  | -0.366852 |
| H | -1.540406 | 1.650578  | -0.904061 |
| H | -0.774961 | 0.743828  | 0.826542  |
| H | -0.794687 | -0.307745 | -0.985756 |
| N | -3.126223 | -0.151021 | 0.158663  |
| C | -3.768878 | 0.830624  | 1.010086  |
| H | -3.158448 | 1.002904  | 1.909394  |
| H | -3.860926 | 1.788249  | 0.475338  |
| H | -4.785543 | 0.517870  | 1.336788  |
| C | -3.828666 | -0.340725 | -1.094942 |
| H | -3.927881 | 0.621806  | -1.619637 |
| H | -3.259549 | -1.023475 | -1.744241 |
| H | -4.848134 | -0.765206 | -0.957831 |
| C | -2.879049 | -1.402661 | 0.847929  |
| H | -2.315687 | -2.085704 | 0.194184  |
| H | -2.272364 | -1.221314 | 1.747916  |
| H | -3.816772 | -1.914497 | 1.158749  |

### IM2

|   |           |           |           |
|---|-----------|-----------|-----------|
| C | -1.020252 | 0.213126  | -0.558141 |
| C | -2.373685 | -1.521148 | -0.472242 |
| C | -2.944549 | -0.779573 | 0.526972  |
| S | -2.088381 | 0.714961  | 0.726349  |
| H | -2.723649 | -2.500355 | -0.802855 |
| H | -3.810542 | -1.021250 | 1.141724  |
| N | -1.278654 | -0.951206 | -1.073443 |

N 0.100959 1.002056 -0.942493  
H 0.982647 0.502832 -0.538547  
H 0.192236 0.937059 -1.961106  
B 0.167623 2.545635 -0.460296  
H 1.242332 2.972193 -0.866819  
H 0.123957 2.521736 0.766562  
H -0.788989 3.138390 -0.943883  
N 2.202118 -0.351401 0.165142  
C 2.457329 -1.492605 -0.707894  
H 1.526065 -2.058346 -0.860362  
H 2.807771 -1.139576 -1.689928  
H 3.225765 -2.176828 -0.293437  
C 3.362640 0.524884 0.291883  
H 3.668404 0.887331 -0.700858  
H 3.103708 1.397984 0.907566  
H 4.226961 0.007441 0.756626  
C 1.685506 -0.764267 1.467326  
H 1.403438 0.122083 2.054262  
H 0.791249 -1.390430 1.333129  
H 2.431722 -1.346465 2.045964

**TS2**

C 1.174810 0.587681 0.521135  
C 2.252620 -1.323670 0.828857  
C 2.570817 -1.159499 -0.487823  
S 1.853234 0.316168 -1.090006  
H 2.579469 -2.165633 1.442692  
H 3.180208 -1.793650 -1.129274  
N 1.459718 -0.350100 1.389872  
N 0.381487 1.663134 0.785364  
H -1.601895 1.068971 -0.603331  
H 0.065198 1.668318 1.750596  
B -0.208768 2.573134 -0.182685  
H -1.422199 1.863460 -0.955888  
H 0.383898 2.735376 -1.224824  
H -0.870201 3.476960 0.269955  
N -2.175630 -0.356016 -0.125679  
C -2.123205 -0.500939 1.327351  
H -1.082127 -0.625672 1.656106  
H -2.546353 0.395612 1.805693

H -2.704483 -1.380450 1.670597  
C -3.544870 -0.221584 -0.611438  
H -4.032455 0.635224 -0.122386  
H -3.539677 -0.040844 -1.696959  
H -4.146512 -1.129384 -0.409618  
C -1.454460 -1.421064 -0.817476  
H -1.386696 -1.188668 -1.890850  
H -0.436287 -1.508731 -0.417687  
H -1.961089 -2.399916 -0.701838

**IM3**

C 0.442852 -0.001101 -0.000030  
C -1.294471 1.355763 0.000069  
C -1.996991 0.182978 0.000057  
S -0.891345 -1.158911 -0.000091  
H -1.751698 2.346968 0.000130  
H -3.074392 0.027504 0.000087  
N 0.072205 1.242399 0.000036  
N 1.757425 -0.450179 -0.000058  
H 1.845499 -1.462295 -0.000242  
B 2.935545 0.323273 0.000133  
H 2.869189 1.520334 0.000351  
H 3.979448 -0.277679 0.000041

**IM3-dimer**

C 1.718325 -0.551672 0.045609  
C 2.928177 1.364569 0.235351  
C 3.858496 0.636278 -0.420186  
S 3.242717 -0.969834 -0.740137  
H 3.031674 2.397652 0.560067  
H 4.853124 0.937686 -0.740292  
N 1.727754 0.715667 0.489750  
N 0.728422 -1.429832 0.137893  
H 0.898424 -2.279150 -0.389924  
B -0.487578 -1.512255 1.105467  
H -0.835024 -2.682249 1.123160  
H -0.216545 -1.099123 2.209103  
C -1.718100 0.551460 0.044815  
C -2.928017 -1.364657 0.235228  
C -3.858450 -0.636391 -0.420216

S -3.243056 0.969908 -0.739655  
H -3.031318 -2.397756 0.559930  
H -4.853086 -0.937947 -0.740173  
N -1.727502 -0.715748 0.489142  
N -0.728116 1.429630 0.137018  
H -0.898523 2.279239 -0.390212  
B 0.487448 1.512640 1.105199  
H 0.215886 1.100445 2.209034  
H 0.834961 2.682566 1.122423

### TS3

C 0.544700 0.655255 0.037070  
C 0.834639 -1.549339 0.346550  
C 2.126634 -1.229516 0.067112  
S 2.274452 0.488890 -0.224156  
H 0.453583 -2.549519 0.553191  
H 2.993953 -1.884132 0.004665  
N -0.042612 -0.489767 0.323315  
N -0.144181 1.818227 -0.033220  
H 0.225205 2.533379 -0.651159  
B -1.489099 1.926428 0.529043  
H -1.665612 1.451913 1.621402  
H -2.151788 2.852738 0.141039  
C -2.015143 -0.732728 -0.185697  
O -2.173339 -1.894401 -0.161828  
O -2.381474 0.391900 -0.381762

### IM4

C 0.430698 -0.726393 0.014617  
C 0.860917 1.549849 -0.139934  
C 2.125327 1.101509 -0.059611  
S 2.182405 -0.657604 0.079286  
H 0.508310 2.575343 -0.217573  
H 3.045924 1.680868 -0.071413  
N -0.093431 0.532756 -0.099092  
N -0.331227 -1.777435 0.051503  
H 0.110306 -2.686062 0.155302  
B -1.876616 -1.657593 -0.220953  
H -2.080129 -1.839397 -1.416886  
H -2.471345 -2.439262 0.497481

C -1.524439 0.813299 0.048309  
O -1.871321 1.964706 0.098133  
O -2.257539 -0.239541 0.157132

### IM5

N 0.719802 -1.692484 -0.246374  
C -0.557769 -1.597942 -0.965582  
H -0.387188 -1.360095 -2.027362  
C -1.514171 -0.586698 -0.368817  
C -2.245445 0.274613 -1.195482  
C -1.697564 -0.508587 1.018974  
C -3.152263 1.188594 -0.651394  
H -2.101060 0.232117 -2.278812  
C -2.598500 0.406043 1.566141  
H -1.122420 -1.166153 1.675115  
C -3.330505 1.257316 0.732109  
H -3.714527 1.854660 -1.310722  
H -2.729645 0.456594 2.650007  
H -4.033962 1.975301 1.160851  
C 1.471418 -0.481664 -0.135693  
C 2.164533 -0.188672 1.048869  
C 1.518439 0.440710 -1.192153  
C 2.910833 0.984337 1.161892  
H 2.103739 -0.881664 1.888798  
C 2.260802 1.616822 -1.070761  
H 0.981776 0.242339 -2.119939  
C 2.964160 1.894881 0.103175  
H 3.442825 1.193804 2.093274  
H 2.287694 2.321393 -1.905739  
H 3.540534 2.818139 0.196513  
H -1.007391 -2.600657 -0.942953  
B 1.167176 -2.914340 0.273851  
H 2.249143 -2.984977 0.794288  
H 0.452177 -3.880224 0.174387

### BH<sub>3</sub>

B 0.000000 0.000000 0.000004  
H 0.000000 1.204298 -0.000006  
H -1.042953 -0.602149 -0.000006  
H 1.042953 -0.602149 -0.000006

**TS4**

|   |           |           |           |
|---|-----------|-----------|-----------|
| N | 0.536532  | 0.679664  | -0.493636 |
| C | 1.546514  | 1.234608  | 0.420940  |
| H | 1.569460  | 2.319281  | 0.246441  |
| C | 2.936362  | 0.660942  | 0.234993  |
| C | 3.770939  | 0.484689  | 1.346317  |
| C | 3.423124  | 0.320928  | -1.035202 |
| C | 5.069211  | -0.009314 | 1.195081  |
| H | 3.398137  | 0.736456  | 2.343483  |
| C | 4.718396  | -0.176990 | -1.188485 |
| H | 2.782703  | 0.442357  | -1.910722 |
| C | 5.546951  | -0.342728 | -0.074614 |
| H | 5.706389  | -0.140964 | 2.073320  |
| H | 5.082650  | -0.438538 | -2.185195 |
| H | 6.559779  | -0.734767 | -0.195933 |
| C | 0.358510  | -0.723082 | -0.446489 |
| C | -0.032274 | -1.461836 | -1.578213 |
| C | 0.527388  | -1.420435 | 0.769344  |
| C | -0.268477 | -2.833665 | -1.490554 |
| H | -0.148430 | -0.953563 | -2.532523 |
| C | 0.294195  | -2.792088 | 0.847266  |
| H | 0.834452  | -0.886890 | 1.667398  |
| C | -0.113527 | -3.511170 | -0.279435 |
| H | -0.570548 | -3.378902 | -2.388410 |
| H | 0.433494  | -3.302861 | 1.803480  |
| H | -0.296391 | -4.586100 | -0.216026 |
| H | 1.236962  | 1.111171  | 1.469405  |
| B | 0.179275  | 1.578383  | -1.698393 |
| H | -0.321612 | 1.018930  | -2.643197 |
| H | 1.017951  | 2.405022  | -1.972669 |
| C | -2.500799 | -0.216378 | 1.029456  |
| C | -2.773712 | 0.204195  | -1.255972 |
| C | -3.436143 | -0.956510 | -1.153960 |
| S | -3.401023 | -1.604279 | 0.486217  |
| H | -2.636343 | 0.834225  | -2.130684 |
| H | -3.949810 | -1.499528 | -1.944082 |
| N | -2.227439 | 0.624504  | -0.030490 |
| N | -2.114187 | 0.076340  | 2.234267  |
| H | -2.308585 | -0.601385 | 2.966988  |

|   |           |          |           |
|---|-----------|----------|-----------|
| B | -1.447266 | 1.437141 | 2.622707  |
| H | -2.242685 | 2.155525 | 3.197275  |
| H | -0.420710 | 1.235152 | 3.242138  |
| C | -1.309936 | 1.678423 | 0.127137  |
| O | -1.039803 | 2.398012 | -0.951265 |
| O | -1.081670 | 2.114755 | 1.281886  |
| B | -2.159950 | 3.463262 | -1.549961 |
| H | -2.472733 | 2.988787 | -2.631909 |
| H | -1.576898 | 4.527628 | -1.613107 |
| H | -3.054065 | 3.420266 | -0.718319 |

**IM6**

|   |           |           |           |
|---|-----------|-----------|-----------|
| N | -0.424119 | -0.662643 | -0.167169 |
| C | -1.417213 | -1.164630 | 0.869423  |
| H | -1.328313 | -2.255523 | 0.881417  |
| C | -2.828495 | -0.731713 | 0.568691  |
| C | -3.305707 | 0.505752  | 1.028816  |
| C | -3.689460 | -1.553154 | -0.173802 |
| C | -4.605501 | 0.921373  | 0.737017  |
| H | -2.652015 | 1.150504  | 1.619546  |
| C | -4.991281 | -1.139353 | -0.465485 |
| H | -3.338363 | -2.525691 | -0.522434 |
| C | -5.450449 | 0.101235  | -0.016039 |
| H | -4.960714 | 1.888084  | 1.102018  |
| H | -5.650117 | -1.791897 | -1.043420 |
| H | -6.468930 | 0.424911  | -0.244598 |
| C | -0.457367 | 0.793681  | -0.253522 |
| C | -1.049538 | 1.414157  | -1.353601 |
| C | 0.038906  | 1.560240  | 0.806847  |
| C | -1.124327 | 2.808324  | -1.403130 |
| H | -1.463817 | 0.811664  | -2.160192 |
| C | -0.025941 | 2.952185  | 0.743706  |
| H | 0.462453  | 1.074497  | 1.686725  |
| C | -0.605632 | 3.580487  | -0.362402 |
| H | -1.595397 | 3.289277  | -2.263141 |
| H | 0.372600  | 3.546543  | 1.568885  |
| H | -0.659695 | 4.670544  | -0.407958 |
| H | -1.088592 | -0.783891 | 1.843727  |
| B | -0.431809 | -1.564592 | -1.531163 |
| H | -0.203354 | -0.910395 | -2.520928 |



H -1.361337 -2.325882 -1.606701  
C 2.950367 0.051285 0.760266  
C 2.354030 0.131517 -1.482999  
C 3.416821 0.950912 -1.516035  
S 4.150696 1.124663 0.075944  
H 1.727967 -0.174780 -2.315351  
H 3.842073 1.458309 -2.378602  
N 2.082588 -0.371508 -0.206358  
N 2.834601 -0.302455 2.008064  
H 3.532083 0.039786 2.661772  
B 1.666953 -1.225920 2.493864  
H 2.095123 -2.058597 3.269655  
H 0.789086 -0.526773 2.997877  
C 1.016072 -1.337365 0.095592  
O 0.836954 -2.216215 -0.966426  
O 1.169189 -1.917905 1.252001  
B 1.979150 -3.143217 -1.628848  
H 2.896307 -3.125221 -0.824037  
H 1.459340 -4.238498 -1.762101  
H 2.258681 -2.603322 -2.692945

### TS5

N -0.522521 -0.650155 0.003000  
C -1.605070 -1.377965 0.819531  
H -1.404376 -2.450386 0.705899  
C -2.995470 -1.024032 0.376213  
C -3.674185 0.045819 0.979447  
C -3.627273 -1.737633 -0.652761  
C -4.953372 0.404868 0.554006  
H -3.190934 0.606928 1.782207  
C -4.907358 -1.378219 -1.079746  
H -3.114956 -2.580115 -1.120599  
C -5.570592 -0.303927 -0.480535  
H -5.469349 1.241064 1.031495  
H -5.390014 -1.942793 -1.880920  
H -6.572355 -0.023413 -0.815080  
C -0.740910 0.796837 0.057523  
C -1.408145 1.410347 -1.000841  
C -0.373842 1.516561 1.195011  
C -1.699522 2.774627 -0.925863

H -1.711100 0.826966 -1.870023  
C -0.661578 2.880490 1.256444  
H 0.150795 1.027289 2.014518  
C -1.323465 3.511727 0.198839  
H -2.225777 3.257868 -1.751716  
H -0.361833 3.451807 2.137607  
H -1.547712 4.579411 0.253632  
H -1.434870 -1.094594 1.865819  
B -0.174908 -1.369521 -1.438169  
H 0.157574 -0.582640 -2.280101  
H -0.939660 -2.248133 -1.730256  
C 3.390033 0.070967 0.369527  
C 2.249294 1.138957 -1.238119  
C 3.493062 1.285782 -1.765862  
S 4.686388 0.550639 -0.722206  
H 1.331529 1.520865 -1.681312  
H 3.783469 1.781229 -2.690150  
N 2.190364 0.450385 -0.043295  
N 3.583166 -0.615843 1.512333  
H 4.409541 -1.203322 1.549495  
B 2.512979 -0.760769 2.522243  
H 2.721517 -1.603608 3.360411  
H 1.993401 0.277461 2.869758  
C 0.813689 -1.193823 0.447488  
O 1.053601 -1.927951 -0.636385  
O 1.138748 -1.419891 1.601505  
B 2.343178 -2.868019 -1.011332  
H 2.738700 -3.278289 0.063985  
H 3.112366 -2.107826 -1.572789  
H 1.847960 -3.710715 -1.737346

### IM7

N -0.984728 -0.343176 -0.081502  
C -0.127117 -1.086108 -1.107453  
H -0.580512 -2.079448 -1.219379  
C 1.310327 -1.173036 -0.683314  
C 2.225232 -0.195002 -1.099832  
C 1.747562 -2.200546 0.165366  
C 3.552340 -0.237259 -0.670306  
H 1.891366 0.610883 -1.757458

|   |           |           |           |
|---|-----------|-----------|-----------|
| C | 3.074786  | -2.242218 | 0.596869  |
| H | 1.045182  | -2.970523 | 0.489927  |
| C | 3.978108  | -1.259026 | 0.182714  |
| H | 4.255037  | 0.530967  | -1.001069 |
| H | 3.405579  | -3.047973 | 1.256277  |
| H | 5.016540  | -1.292853 | 0.521029  |
| C | -0.471968 | 1.016446  | 0.163931  |
| C | 0.407724  | 1.214856  | 1.229398  |
| C | -0.785527 | 2.056261  | -0.713967 |
| C | 0.969113  | 2.476921  | 1.425248  |
| H | 0.662888  | 0.388587  | 1.891853  |
| C | -0.224128 | 3.318161  | -0.502061 |
| H | -1.461258 | 1.889966  | -1.552249 |
| C | 0.652530  | 3.530684  | 0.564040  |
| H | 1.659485  | 2.633056  | 2.256752  |
| H | -0.476927 | 4.136908  | -1.179106 |
| H | 1.090856  | 4.518407  | 0.723311  |
| H | -0.233767 | -0.537386 | -2.052560 |
| B | -1.486995 | -1.218829 | 1.223191  |
| H | -1.424832 | -0.617294 | 2.258720  |
| H | -1.115270 | -2.360479 | 1.173005  |
| C | -2.424351 | -0.393260 | -0.509559 |
| O | -2.897053 | -1.049032 | 0.535063  |
| O | -2.929991 | -0.007881 | -1.508254 |
| B | -4.419009 | -1.685714 | 0.757498  |
| H | -4.509993 | -2.528397 | -0.117982 |
| H | -5.161019 | -0.730826 | 0.627301  |
| H | -4.331668 | -2.124588 | 1.887763  |

**TS6**

|   |           |           |           |
|---|-----------|-----------|-----------|
| N | 0.757937  | -0.509396 | 0.360967  |
| C | -0.276572 | -1.021665 | 1.305954  |
| H | -0.013123 | -2.066016 | 1.522497  |
| C | -1.654504 | -0.932465 | 0.706231  |
| C | -2.550188 | 0.061864  | 1.116404  |
| C | -2.035385 | -1.816174 | -0.314443 |
| C | -3.807648 | 0.175267  | 0.517125  |
| H | -2.255323 | 0.760005  | 1.903657  |
| C | -3.288663 | -1.702577 | -0.917077 |
| H | -1.340392 | -2.592961 | -0.642990 |

|   |           |           |           |
|---|-----------|-----------|-----------|
| C | -4.177277 | -0.704087 | -0.502929 |
| H | -4.497631 | 0.956314  | 0.845213  |
| H | -3.575596 | -2.396038 | -1.711222 |
| H | -5.158833 | -0.614915 | -0.974751 |
| C | 0.650313  | 0.908467  | 0.051671  |
| C | -0.234639 | 1.329955  | -0.945963 |
| C | 1.394409  | 1.842196  | 0.780307  |
| C | -0.371854 | 2.692689  | -1.211186 |
| H | -0.807093 | 0.592949  | -1.508035 |
| C | 1.265105  | 3.203818  | 0.494914  |
| H | 2.072983  | 1.509530  | 1.568847  |
| C | 0.379074  | 3.630966  | -0.496358 |
| H | -1.063884 | 3.021339  | -1.989671 |
| H | 1.857112  | 3.930597  | 1.055586  |
| H | 0.275252  | 4.696158  | -0.715180 |
| H | -0.219855 | -0.454152 | 2.248082  |
| B | 1.626933  | -1.374233 | -1.537456 |
| H | 1.440388  | -0.593316 | -2.421667 |
| H | 1.149560  | -2.468948 | -1.450925 |
| C | 2.072480  | -0.956101 | 0.656825  |
| O | 2.682032  | -1.049588 | -0.564298 |
| O | 2.546494  | -1.286597 | 1.695620  |
| B | 4.011896  | -1.873077 | -1.082331 |
| H | 4.100438  | -2.849443 | -0.369361 |
| H | 4.930723  | -1.082669 | -1.072329 |
| H | 3.589446  | -2.129546 | -2.214991 |

**IM8**

|   |           |           |           |
|---|-----------|-----------|-----------|
| N | 0.459915  | 0.610536  | 0.614147  |
| C | -0.605618 | 0.058366  | 1.489518  |
| H | -0.124612 | -0.721884 | 2.091726  |
| C | -1.775758 | -0.512791 | 0.718370  |
| C | -3.061201 | 0.022055  | 0.886056  |
| C | -1.591115 | -1.566845 | -0.190790 |
| C | -4.141156 | -0.472765 | 0.146666  |
| H | -3.221382 | 0.827742  | 1.606861  |
| C | -2.667159 | -2.056156 | -0.931207 |
| H | -0.599784 | -2.005041 | -0.322456 |
| C | -3.944076 | -1.507109 | -0.768647 |
| H | -5.135710 | -0.042851 | 0.286028  |

H -2.510149 -2.873660 -1.638964  
H -4.783933 -1.890810 -1.352570  
C 1.583273 -0.234925 0.308303  
C 1.785003 -0.664033 -1.005134  
C 2.428681 -0.662465 1.335840  
C 2.845798 -1.525593 -1.291250  
H 1.117638 -0.321540 -1.797123  
C 3.481157 -1.528643 1.043535  
H 2.273528 -0.298942 2.353364  
C 3.692247 -1.960880 -0.270032  
H 3.010011 -1.854081 -2.319751  
H 4.148521 -1.856664 1.843530  
H 4.521890 -2.634162 -0.497035  
H -0.942712 0.847543 2.172753  
C 0.279185 1.787355 -0.000559  
O 1.091403 2.430766 -0.678004  
O -0.937806 2.342488 0.188648  
B -1.973300 2.195036 -0.702039  
H -1.804258 1.543673 -1.697946  
H -2.982329 2.784558 -0.435319  
H 3.105618 2.113862 0.347252  
H 3.043109 1.760610 -1.659513  
H 2.921521 3.672839 -0.964787  
B 2.705157 2.492083 -0.742812

**TS7**

N -0.506402 0.522345 -0.575941  
C 0.544998 0.106501 -1.516644  
H 0.075600 -0.566950 -2.245290  
C 1.701759 -0.589734 -0.829729  
C 2.955537 0.032015 -0.721154  
C 1.516489 -1.850843 -0.240582  
C 4.000335 -0.586700 -0.022294  
H 3.123947 0.996864 -1.206038  
C 2.555254 -2.462667 0.460367  
H 0.549912 -2.351290 -0.325576  
C 3.798369 -1.829550 0.577302  
H 4.969898 -0.089324 0.054305  
H 2.396366 -3.441661 0.918927  
H 4.608947 -2.311223 1.129005

C -1.555908 -0.401614 -0.250148  
C -1.689300 -0.881949 1.055790  
C -2.423168 -0.840233 -1.255453  
C -2.697890 -1.799443 1.354751  
H -1.007441 -0.533661 1.832510  
C -3.416242 -1.773028 -0.955113  
H -2.327883 -0.435997 -2.265073  
C -3.558287 -2.251429 0.350659  
H -2.806500 -2.167224 2.377595  
H -4.094769 -2.111809 -1.741291  
H -4.344176 -2.972531 0.586685  
H 0.892775 0.987465 -2.072004  
C -0.470566 1.732898 0.056146  
O -1.345677 2.135844 0.853301  
O 0.955789 2.100417 0.539789  
B 1.832368 1.445228 1.380218  
H 1.425285 0.473699 1.945130  
H 2.892297 1.975631 1.548994  
B 0.882336 3.203736 -0.526379  
H 1.668922 3.046526 -1.421406  
H 0.597445 4.280318 -0.079950  
H -0.307154 2.687567 -0.938259  
H -3.205626 3.350420 1.246075  
H -2.422132 3.420144 -0.646797  
H -3.435154 1.764369 -0.022015  
B -2.745688 2.716402 0.311753

**IM9**

N -0.768257 -0.782252 0.697878  
C 0.437684 -0.902755 1.536608  
H 0.322571 -0.228871 2.397753  
C 1.692559 -0.568229 0.764518  
C 2.161545 -1.445533 -0.224108  
C 2.363360 0.641066 0.977796  
C 3.285529 -1.119401 -0.983585  
H 1.639400 -2.389379 -0.405960  
C 3.491213 0.969158 0.219977  
H 1.994670 1.335135 1.737433  
C 3.952716 0.090578 -0.762361  
H 3.644129 -1.810813 -1.749827

|   |           |           |           |
|---|-----------|-----------|-----------|
| H | 4.006616  | 1.916597  | 0.394621  |
| H | 4.832657  | 0.346673  | -1.357364 |
| C | -1.129874 | 0.529368  | 0.226544  |
| C | -1.939985 | 1.341474  | 1.023823  |
| C | -0.635917 | 0.987237  | -0.997448 |
| C | -2.260978 | 2.628397  | 0.587655  |
| H | -2.319619 | 0.959515  | 1.973845  |
| C | -0.962586 | 2.274809  | -1.426860 |
| H | -0.002781 | 0.336766  | -1.602268 |
| C | -1.772022 | 3.094978  | -0.635898 |
| H | -2.899215 | 3.265669  | 1.203778  |
| H | -0.582180 | 2.637326  | -2.384346 |
| H | -2.025846 | 4.101729  | -0.975832 |
| H | 0.470771  | -1.934292 | 1.915575  |
| C | -1.452630 | -1.859541 | 0.327347  |
| O | -2.446752 | -1.809136 | -0.424274 |
| H | -1.103339 | -2.827552 | 0.722651  |
| B | -3.238492 | -3.112514 | -0.860408 |
| H | -4.398053 | -2.928775 | -0.517405 |
| H | -3.112664 | -3.184711 | -2.075763 |
| H | -2.706523 | -4.053229 | -0.269838 |

**TS8**

|   |           |           |           |
|---|-----------|-----------|-----------|
| N | 0.789384  | -1.032876 | -0.093079 |
| C | -0.397916 | -1.512650 | -0.799865 |
| H | -0.296494 | -1.366405 | -1.889145 |
| C | -1.672384 | -0.869600 | -0.302501 |
| C | -1.899954 | -0.715442 | 1.072156  |
| C | -2.649515 | -0.436925 | -1.205781 |
| C | -3.086801 | -0.145018 | 1.533166  |
| H | -1.133973 | -1.035711 | 1.782411  |
| C | -3.841714 | 0.130068  | -0.746224 |
| H | -2.474910 | -0.540177 | -2.280436 |
| C | -4.062611 | 0.278102  | 0.624685  |
| H | -3.251146 | -0.026967 | 2.607102  |
| H | -4.595517 | 0.465286  | -1.462845 |
| H | -4.990745 | 0.727511  | 0.986073  |
| C | 1.061315  | 0.371754  | -0.080517 |
| C | 1.579648  | 0.973982  | 1.073970  |
| C | 0.775968  | 1.156891  | -1.204522 |

|   |           |           |           |
|---|-----------|-----------|-----------|
| C | 1.828668  | 2.345983  | 1.090224  |
| H | 1.787359  | 0.362617  | 1.950733  |
| C | 1.015264  | 2.532142  | -1.175242 |
| H | 0.369613  | 0.700290  | -2.107199 |
| C | 1.546183  | 3.131303  | -0.031337 |
| H | 2.237252  | 2.806246  | 1.992996  |
| H | 0.787340  | 3.135911  | -2.056862 |
| H | 1.734587  | 4.207190  | -0.011148 |
| H | -0.444636 | -2.602063 | -0.641734 |
| C | 1.775241  | -1.948195 | 0.162931  |
| O | 2.864482  | -1.609612 | 0.821297  |
| H | 1.395799  | -2.978877 | 0.262091  |
| B | 3.580377  | -1.893578 | -0.485528 |
| H | 2.496575  | -2.260783 | -1.152479 |
| H | 3.922297  | -0.889984 | -1.072890 |
| H | 4.284812  | -2.883531 | -0.464712 |

**IM10**

|   |           |           |           |
|---|-----------|-----------|-----------|
| N | -0.668684 | 0.683521  | -1.022293 |
| C | 0.657698  | 0.488720  | -1.587920 |
| H | 0.624364  | -0.296474 | -2.362810 |
| C | 1.760720  | 0.159797  | -0.595305 |
| C | 1.740068  | 0.663614  | 0.711322  |
| C | 2.837854  | -0.642100 | -0.995915 |
| C | 2.780364  | 0.373080  | 1.597263  |
| H | 0.902011  | 1.284824  | 1.031345  |
| C | 3.881666  | -0.929155 | -0.112955 |
| H | 2.857426  | -1.051672 | -2.010491 |
| C | 3.854791  | -0.422386 | 1.189177  |
| H | 2.749416  | 0.770085  | 2.615156  |
| H | 4.713849  | -1.557730 | -0.440224 |
| H | 4.665947  | -0.651112 | 1.884879  |
| C | -1.351426 | -0.395444 | -0.445880 |
| C | -2.587871 | -0.219981 | 0.214708  |
| C | -0.824632 | -1.703857 | -0.512563 |
| C | -3.270613 | -1.309404 | 0.755408  |
| H | -3.030256 | 0.768931  | 0.320168  |
| C | -1.518355 | -2.782427 | 0.035654  |
| H | 0.138082  | -1.889465 | -0.983721 |
| C | -2.748062 | -2.601656 | 0.671998  |

H -4.225910 -1.135392 1.257558  
H -1.079916 -3.781282 -0.035564  
H -3.283988 -3.449673 1.103490  
H 0.921008 1.418427 -2.115597  
C -1.209367 1.992748 -0.974432  
O -0.972316 2.645957 0.293602  
H -0.717775 2.609784 -1.737962  
B -1.952019 3.212239 1.014397  
H -2.293415 1.989548 -1.166773  
H -3.097045 3.194057 0.615350  
H -1.641402 3.734347 2.057080

**TS9**

N -0.572038 0.018441 1.416250  
C 0.663497 -0.694185 1.849305  
H 1.138852 -0.082639 2.629049  
C 1.611641 -0.942536 0.704866  
C 1.172152 -1.626735 -0.437382  
C 2.934893 -0.490642 0.776242  
C 2.053602 -1.851194 -1.495517  
H 0.138740 -1.975851 -0.509222  
C 3.818144 -0.726960 -0.280085  
H 3.279048 0.049241 1.662677  
C 3.376869 -1.405122 -1.418933  
H 1.700425 -2.380049 -2.383750  
H 4.850238 -0.374354 -0.215253  
H 4.064517 -1.584855 -2.248974  
C -0.426101 1.180287 0.569195  
C -1.236996 1.292116 -0.563333  
C 0.531754 2.148174 0.884674  
C -1.092276 2.412951 -1.382833  
H -1.951443 0.498986 -0.800087  
C 0.661197 3.262321 0.056292  
H 1.161465 2.047169 1.768748  
C -0.148536 3.396254 -1.076101  
H -1.716839 2.506620 -2.273551  
H 1.400173 4.029140 0.297775  
H -0.037115 4.268045 -1.724621  
H 0.327460 -1.632105 2.311638  
C -1.734419 -0.427260 1.738528

O -3.283857 -1.221004 -0.407681  
B -4.560662 -0.947188 -0.612814  
H -4.935178 0.209747 -0.459861  
H -5.367414 -1.801431 -0.937013  
B -2.540423 -2.540376 -0.500722  
H -1.733064 -2.474867 -1.436111  
H -3.316649 -3.489025 -0.643801  
H -1.892689 -2.682516 0.560950  
H -2.626195 0.120599 1.439292  
H -1.816300 -1.339894 2.327983

**3aa**

N 0.614465 1.324803 -0.253702  
C -0.562085 1.114085 -1.067407  
H -0.283481 0.592927 -1.999112  
C -1.700201 0.358438 -0.395951  
C -2.831032 0.002416 -1.146227  
C -1.655367 0.016820 0.959854  
C -3.896205 -0.675933 -0.552172  
H -2.876018 0.258754 -2.209340  
C -2.720820 -0.664074 1.557376  
H -0.774026 0.280061 1.547502  
C -3.844610 -1.011709 0.805046  
H -4.770257 -0.946474 -1.150290  
H -2.668817 -0.926619 2.617166  
H -4.676524 -1.545077 1.271536  
C 1.596011 0.352766 -0.158528  
C 2.835900 0.624409 0.468908  
C 1.396051 -0.951239 -0.675171  
C 3.821351 -0.358615 0.560693  
H 3.039709 1.612734 0.879017  
C 2.394225 -1.918436 -0.577280  
H 0.445522 -1.221306 -1.133430  
C 3.617612 -1.638100 0.038880  
H 4.768523 -0.111676 1.048352  
H 2.203238 -2.915351 -0.984009  
H 4.393506 -2.402905 0.114105  
H -0.934741 2.100625 -1.387785  
C 0.780657 2.598568 0.410756  
H 1.575527 3.219647 -0.046114

|                          |           |           |           |   |           |           |           |
|--------------------------|-----------|-----------|-----------|---|-----------|-----------|-----------|
| H                        | -0.160260 | 3.161326  | 0.356649  | C | -2.877870 | -0.616419 | 0.072875  |
| H                        | 1.027908  | 2.473334  | 1.479002  | C | -3.763119 | -0.772002 | 1.148753  |
| <b>NMe<sub>3</sub></b>   |           |           |           | C | -3.283253 | 0.153938  | -1.026140 |
| N                        | 0.000000  | 0.000000  | 0.353766  | C | -5.029080 | -0.182351 | 1.126376  |
| C                        | 0.000000  | 1.387573  | -0.056359 | H | -3.454560 | -1.362263 | 2.016509  |
| H                        | -0.890392 | 1.902967  | 0.338850  | C | -4.546613 | 0.749226  | -1.048015 |
| H                        | 0.890392  | 1.902967  | 0.338850  | H | -2.606486 | 0.294252  | -1.869903 |
| H                        | 0.000000  | 1.520001  | -1.165001 | C | -5.425110 | 0.582511  | 0.026072  |
| C                        | 1.201674  | -0.693787 | -0.056359 | H | -5.705289 | -0.315058 | 1.974803  |
| H                        | 2.093214  | -0.180381 | 0.338850  | H | -4.845374 | 1.348976  | -1.911517 |
| H                        | 1.202822  | -1.722586 | 0.338850  | H | -6.412396 | 1.050673  | 0.007797  |
| H                        | 1.316360  | -0.760001 | -1.165001 | C | -0.204338 | 0.719736  | -0.232269 |
| C                        | -1.201674 | -0.693787 | -0.056359 | C | 0.209045  | 1.695326  | -1.154479 |
| H                        | -1.202822 | -1.722586 | 0.338850  | C | -0.298937 | 1.087897  | 1.125412  |
| H                        | -2.093214 | -0.180381 | 0.338850  | C | 0.537924  | 2.984168  | -0.731239 |
| H                        | -1.316360 | -0.760001 | -1.165001 | H | 0.268472  | 1.438040  | -2.209089 |
| <b>H<sub>2</sub></b>     |           |           |           | C | 0.027041  | 2.377545  | 1.540008  |
| H                        | 0.000000  | 0.000000  | 0.380543  | H | -0.616910 | 0.358899  | 1.869010  |
| H                        | 0.000000  | 0.000000  | -0.380543 | C | 0.454756  | 3.335951  | 0.616700  |
| <b>CO<sub>2</sub></b>    |           |           |           | H | 0.857533  | 3.721945  | -1.471601 |
| C                        | 0.000000  | 0.000000  | -0.000003 | H | -0.054372 | 2.633968  | 2.599364  |
| O                        | 0.000000  | 0.000000  | -1.162902 | H | 0.710807  | 4.346141  | 0.944076  |
| O                        | 0.000000  | 0.000000  | 1.162904  | H | -1.231058 | -1.455529 | 1.166818  |
| <b>B(OH)<sub>2</sub></b> |           |           |           | B | -0.263328 | -1.201072 | -2.101436 |
| O                        | -0.000012 | 0.436938  | 0.000000  | H | 0.201978  | -0.399009 | -2.886485 |
| B                        | -0.000012 | -0.178048 | 1.221410  | H | -1.256655 | -1.762525 | -2.519523 |
| H                        | 0.000439  | 0.527328  | 2.199097  | C | 2.629267  | -0.383955 | 0.774239  |
| H                        | -0.000329 | -1.384842 | 1.288676  | C | 2.765259  | -0.234812 | -1.541070 |
| B                        | -0.000012 | -0.178048 | -1.221410 | C | 3.616015  | 0.750833  | -1.209505 |
| H                        | 0.000439  | 0.527328  | -2.199097 | S | 3.741391  | 0.943870  | 0.538130  |
| H                        | -0.000329 | -1.384842 | -1.288676 | H | 2.479298  | -0.573238 | -2.532356 |
| <b>TS4'</b>              |           |           |           | H | 4.181860  | 1.398734  | -1.874751 |
| N                        | -0.463282 | -0.622007 | -0.629647 | N | 2.198100  | -0.864997 | -0.431697 |
| C                        | -1.531584 | -1.307049 | 0.120613  | N | 2.238141  | -0.916503 | 1.894881  |
| H                        | -1.619245 | -2.315701 | -0.306435 | H | 2.564585  | -0.488839 | 2.756393  |
|                          |           |           |           | B | 1.382126  | -2.226417 | 1.966862  |
|                          |           |           |           | H | 2.061189  | -3.137100 | 2.413977  |
|                          |           |           |           | H | 0.377584  | -2.017287 | 2.630769  |
|                          |           |           |           | C | 1.116335  | -1.826217 | -0.497616 |
|                          |           |           |           | O | 0.812317  | -2.250006 | -1.688127 |

O 0.994890 -2.573865 0.533863

**IM6'**

N -0.383198 -0.741274 -0.368090  
C -1.381472 -1.382294 0.569181  
H -1.361995 -2.456583 0.358249  
C -2.769295 -0.815590 0.405668  
C -3.168756 0.304027 1.152052  
C -3.680983 -1.381768 -0.497546  
C -4.440536 0.855278 0.988683  
H -2.473832 0.750802 1.865849  
C -4.954912 -0.832576 -0.661828  
H -3.389214 -2.259436 -1.076107  
C -5.336414 0.290508 0.076693  
H -4.733077 1.728142 1.577443  
H -5.653428 -1.287042 -1.368762  
H -6.332884 0.720467 -0.052503  
C -0.342644 0.699956 -0.183695  
C -0.907746 1.544333 -1.141274  
C 0.202195 1.237938 0.988572  
C -0.907233 2.926273 -0.936289  
H -1.358857 1.118998 -2.036051  
C 0.212652 2.619600 1.180909  
H 0.605993 0.577679 1.756263  
C -0.339968 3.469089 0.218055  
H -1.358025 3.579795 -1.686641  
H 0.649100 3.032020 2.093567  
H -0.335445 4.550574 0.372491  
H -1.019230 -1.231646 1.593518  
B -0.406746 -1.405854 -1.880037  
H -0.200316 -0.563838 -2.735880  
H -1.390765 -2.084207 -2.082110  
C 3.002444 -0.320348 0.583046  
C 2.449490 0.102394 -1.624297  
C 3.532865 0.893264 -1.527985  
S 4.241232 0.816839 0.083701  
H 1.814393 -0.055408 -2.491599  
H 3.975764 1.521514 -2.297064  
N 2.143843 -0.568819 -0.442660  
N 2.868037 -0.869980 1.757540

H 3.558049 -0.642339 2.466019  
B 1.698617 -1.872498 2.061062  
H 2.139484 -2.828111 2.678105  
H 0.829552 -1.279178 2.701736  
C 1.028196 -1.562490 -0.323719  
O 0.816467 -2.188733 -1.491240  
O 1.199482 -2.335631 0.728020

**TS5'**

N 0.488215 -0.902303 0.294997  
C 1.561642 -1.471644 -0.635753  
H 1.626473 -2.543526 -0.414021  
C 2.890603 -0.790312 -0.460949  
C 3.213169 0.334304 -1.235787  
C 3.818038 -1.250920 0.484853  
C 4.430338 0.993490 -1.060274  
H 2.499041 0.701115 -1.976085  
C 5.036844 -0.592135 0.661490  
H 3.583311 -2.130731 1.086231  
C 5.343523 0.533805 -0.107237  
H 4.666193 1.869362 -1.669308  
H 5.751045 -0.962750 1.400676  
H 6.296972 1.049410 0.031764  
C 0.356616 0.536273 0.091518  
C 0.952718 1.405776 1.001475  
C -0.305629 1.020189 -1.039024  
C 0.860817 2.783648 0.792147  
H 1.485516 1.007362 1.864617  
C -0.410859 2.397664 -1.228850  
H -0.754186 0.327182 -1.750726  
C 0.170527 3.281741 -0.314400  
H 1.327829 3.468295 1.503441  
H -0.952642 2.781020 -2.096142  
H 0.088767 4.359973 -0.469389  
H 1.184774 -1.348483 -1.658634  
B 0.508233 -1.594819 1.809784  
H 0.141313 -0.817107 2.655481  
H 1.523153 -2.207947 2.029618  
C -3.180848 -0.328644 -0.271622  
C -2.256474 0.575800 1.576205

C -3.118237 1.584521 1.297028  
S -4.047539 1.209698 -0.145249  
H -1.572203 0.552142 2.421232  
H -3.284672 2.507523 1.847796  
N -2.271676 -0.483208 0.689009  
N -3.391212 -1.235399 -1.220483  
H -4.000629 -0.976192 -1.986825  
B -2.635359 -2.570732 -1.208189  
H -2.964826 -3.284873 -0.275610  
H -2.675872 -3.099872 -2.301952  
C -0.742729 -1.773118 0.182074  
O -0.615565 -2.483041 1.252271  
O -1.143278 -2.126405 -0.960794

### Imine

N 0.457069 -0.481935 -0.104023  
C -0.404350 0.419065 0.178384  
H -0.101017 1.426555 0.523362  
C -1.851271 0.189731 0.087112  
C -2.739914 1.223228 0.428225  
C -2.368576 -1.048727 -0.337291  
C -4.119529 1.026583 0.347275  
H -2.341574 2.186623 0.758590  
C -3.744421 -1.243098 -0.416017  
H -1.666983 -1.843197 -0.598220  
C -4.623679 -0.206465 -0.074619  
H -4.802941 1.836226 0.614149  
H -4.140285 -2.206926 -0.745558  
H -5.703405 -0.362855 -0.138448  
C 1.828999 -0.210370 -0.065829  
C 2.690644 -1.229305 0.381617  
C 2.385038 1.012392 -0.491217  
C 4.066478 -1.015994 0.443889  
H 2.251153 -2.181310 0.686492  
C 3.765298 1.212407 -0.442287  
H 1.733124 1.792270 -0.890744  
C 4.611176 0.205598 0.032391  
H 4.721304 -1.812230 0.806957  
H 4.184572 2.161557 -0.786178  
H 5.691208 0.366558 0.067963

### IM5'

N 0.500453 0.617074 0.186432  
C -0.402084 -0.274567 -0.091901  
H -0.021243 -1.256638 -0.395015  
C -1.852518 -0.182729 -0.076668  
C -2.540425 -1.399949 -0.294766  
C -2.607247 0.996614 0.108169  
C -3.930017 -1.445811 -0.305771  
H -1.967605 -2.317363 -0.452862  
C -3.999769 0.943372 0.086093  
H -2.096911 1.943141 0.257269  
C -4.664139 -0.270161 -0.113563  
H -4.443960 -2.395726 -0.468348  
H -4.572418 1.862797 0.226773  
H -5.756466 -0.300350 -0.125057  
C 1.868883 0.186074 0.076769  
C 2.758946 0.922297 -0.714596  
C 2.307193 -0.955931 0.756084  
C 4.079798 0.495173 -0.842095  
H 2.406742 1.817147 -1.228422  
C 3.636153 -1.369701 0.631417  
H 1.616577 -1.500142 1.403698  
C 4.523528 -0.649338 -0.170100  
H 4.769877 1.064047 -1.469575  
H 3.977833 -2.254397 1.173777  
H 5.562572 -0.972689 -0.265795  
H -0.522957 2.077581 1.611216  
B 0.267245 2.124047 0.675909  
H 1.348722 2.565059 1.017680  
H -0.209982 2.755721 -0.264349

### TS10

N 0.500005 0.676130 -0.043955  
C -0.432587 -0.025233 -0.687791  
C 1.824112 0.203472 0.021541  
C 2.909640 1.095567 0.069564  
C 2.072480 -1.176957 0.138108  
C 4.208599 0.611651 0.206247  
H 2.723254 2.166521 -0.013236



|   |           |           |           |
|---|-----------|-----------|-----------|
| C | 3.379431  | -1.652382 | 0.264088  |
| H | 1.235489  | -1.878842 | 0.166445  |
| C | 4.455499  | -0.763533 | 0.296105  |
| H | 5.041357  | 1.318832  | 0.237666  |
| H | 3.552542  | -2.728040 | 0.351399  |
| H | 5.477125  | -1.135779 | 0.400174  |
| H | -0.631800 | 1.491112  | -1.927278 |
| B | 0.046807  | 1.962201  | -0.979572 |
| H | -0.623266 | 2.748243  | -0.345301 |
| H | 1.063148  | 2.313507  | -1.537711 |
| C | -1.828897 | -0.084009 | -0.255241 |
| C | -2.234123 | 0.509684  | 0.954318  |
| C | -2.762914 | -0.788157 | -1.035136 |
| C | -3.560822 | 0.411437  | 1.364061  |
| H | -1.492079 | 1.032698  | 1.559509  |
| C | -4.089426 | -0.884002 | -0.620225 |
| H | -2.442796 | -1.253063 | -1.971111 |
| C | -4.489322 | -0.281561 | 0.577570  |
| H | -3.875883 | 0.871575  | 2.303298  |
| H | -4.814599 | -1.429139 | -1.228462 |
| H | -5.529173 | -0.358708 | 0.904465  |
| H | -0.127404 | -0.758703 | -1.453564 |

**Int-I**

|   |           |           |           |
|---|-----------|-----------|-----------|
| C | 1.161853  | -0.341602 | -0.007029 |
| C | 1.279454  | 1.070113  | -0.004609 |
| C | 0.113453  | 1.820020  | 0.002317  |
| C | -1.130890 | 1.176204  | 0.005102  |
| C | -1.151998 | -0.222889 | 0.004146  |
| H | 2.263129  | 1.544750  | -0.011521 |
| H | 0.167826  | 2.912083  | 0.005901  |
| H | -2.061553 | 1.745922  | 0.009888  |
| N | -0.028058 | -0.954724 | 0.002804  |
| N | 2.270982  | -1.147309 | -0.056047 |
| C | -2.444071 | -0.995337 | 0.000218  |
| H | -3.318840 | -0.338882 | 0.111334  |
| H | -2.549222 | -1.560216 | -0.941363 |
| H | -2.447740 | -1.737370 | 0.814582  |
| H | 3.163555  | -0.764171 | 0.228626  |
| H | 2.115574  | -2.126932 | 0.154389  |

**TS-1**

|   |           |           |           |
|---|-----------|-----------|-----------|
| N | 0.423615  | -0.699179 | 1.654242  |
| H | 0.260045  | -1.627921 | 2.035897  |
| H | 0.486745  | 0.001451  | 2.391142  |
| B | -1.416902 | -0.268743 | 0.740913  |
| H | -2.017349 | -0.425596 | 1.785552  |
| H | -1.314492 | -1.193773 | -0.037511 |
| H | -1.053260 | 0.838196  | 0.411670  |
| N | -3.468416 | 0.224026  | -0.258139 |
| C | -4.308647 | -0.947758 | -0.103073 |
| H | -3.830093 | -1.817473 | -0.578294 |
| H | -4.440964 | -1.175300 | 0.965541  |
| H | -5.316050 | -0.816830 | -0.556257 |
| C | -3.999531 | 1.378667  | 0.441274  |
| H | -4.136007 | 1.141627  | 1.507228  |
| H | -3.291807 | 2.218098  | 0.368805  |
| H | -4.978533 | 1.713737  | 0.033323  |
| C | -3.177213 | 0.511706  | -1.649941 |
| H | -2.476967 | 1.357576  | -1.718675 |
| H | -2.700131 | -0.360611 | -2.121626 |
| H | -4.088911 | 0.766812  | -2.233793 |
| C | 1.505954  | -0.612699 | 0.765210  |
| C | 1.803111  | -1.673806 | -0.108618 |
| C | 3.163412  | 0.723944  | -0.122591 |
| C | 2.842329  | -1.489970 | -1.012182 |
| H | 1.226628  | -2.599728 | -0.076155 |
| C | 3.537121  | -0.275998 | -1.028414 |
| H | 3.110453  | -2.288607 | -1.708431 |
| H | 4.354773  | -0.106428 | -1.731126 |
| N | 2.165400  | 0.542382  | 0.756460  |
| C | 3.859360  | 2.056181  | -0.075120 |
| H | 4.293165  | 2.226258  | 0.923905  |
| H | 4.660790  | 2.129887  | -0.823696 |
| H | 3.136909  | 2.870126  | -0.249261 |

**Int-II**

|   |          |          |           |
|---|----------|----------|-----------|
| N | 0.388550 | 1.517557 | -0.186238 |
| H | 1.162098 | 0.787891 | -0.231310 |
| H | 0.487827 | 2.122162 | -1.004831 |

|   |           |           |           |
|---|-----------|-----------|-----------|
| B | 0.669517  | 2.448534  | 1.130763  |
| H | 1.825256  | 2.844380  | 1.004131  |
| H | 0.523790  | 1.727205  | 2.108113  |
| H | -0.141092 | 3.368818  | 1.103059  |
| N | 2.496849  | -0.363905 | -0.179153 |
| C | 2.217649  | -1.413302 | -1.148406 |
| H | 1.227641  | -1.845955 | -0.945048 |
| H | 2.207455  | -0.993651 | -2.166989 |
| H | 2.974386  | -2.226421 | -1.121770 |
| C | 3.749389  | 0.324175  | -0.456245 |
| H | 3.733824  | 0.738856  | -1.476606 |
| H | 3.883073  | 1.156239  | 0.250756  |
| H | 4.630703  | -0.347733 | -0.375081 |
| C | 2.435705  | -0.863337 | 1.189789  |
| H | 2.625623  | -0.041450 | 1.894538  |
| H | 1.428582  | -1.256796 | 1.389285  |
| H | 3.180513  | -1.666373 | 1.376196  |
| C | -0.894288 | 0.864099  | -0.204436 |
| C | -2.054586 | 1.594532  | -0.484032 |
| C | -3.265948 | 0.910916  | -0.439154 |
| H | -2.001212 | 2.660153  | -0.710218 |
| C | -2.058873 | -1.089946 | 0.153328  |
| C | -3.274312 | -0.447505 | -0.112868 |
| H | -4.201251 | 1.435408  | -0.648591 |
| H | -4.211670 | -1.004478 | -0.062454 |
| N | -0.892380 | -0.425635 | 0.097814  |
| C | -1.985137 | -2.548283 | 0.508070  |
| H | -2.983061 | -2.998634 | 0.602846  |
| H | -1.424651 | -3.104811 | -0.261470 |
| H | -1.444144 | -2.681705 | 1.458385  |

**TS-2**

|   |           |           |           |
|---|-----------|-----------|-----------|
| N | 0.617986  | 2.210659  | -0.298855 |
| H | -2.044055 | 1.329960  | 0.052155  |
| H | 1.008977  | 3.052062  | 0.109003  |
| B | -0.655481 | 2.334919  | -1.002354 |
| H | -1.797713 | 2.183039  | 0.058615  |
| H | -0.944014 | 1.508308  | -1.830620 |
| H | -1.011425 | 3.479892  | -1.193159 |
| N | -2.688852 | -0.137187 | 0.261639  |

|   |           |           |           |
|---|-----------|-----------|-----------|
| C | -1.984810 | -0.692509 | 1.410228  |
| H | -0.911393 | -0.749119 | 1.183400  |
| H | -2.122792 | -0.037793 | 2.284503  |
| H | -2.351053 | -1.705538 | 1.673973  |
| C | -4.104540 | 0.078685  | 0.521175  |
| H | -4.228893 | 0.723030  | 1.405127  |
| H | -4.569508 | 0.582202  | -0.340056 |
| H | -4.647892 | -0.870475 | 0.704241  |
| C | -2.444407 | -0.900778 | -0.957871 |
| H | -2.948118 | -0.414679 | -1.806112 |
| H | -1.364584 | -0.917731 | -1.155102 |
| H | -2.823937 | -1.940348 | -0.875697 |
| C | 1.398433  | 1.098751  | -0.086149 |
| C | 2.670975  | 1.233954  | 0.528930  |
| C | 3.441237  | 0.099506  | 0.718623  |
| H | 3.028858  | 2.220580  | 0.832611  |
| C | 1.687357  | -1.196477 | -0.287251 |
| C | 2.954039  | -1.146890 | 0.302063  |
| H | 4.425822  | 0.178846  | 1.187343  |
| H | 3.541485  | -2.056921 | 0.434110  |
| N | 0.930975  | -0.100475 | -0.460670 |
| C | 1.090029  | -2.498867 | -0.750174 |
| H | 1.781837  | -3.340787 | -0.604831 |
| H | 0.159372  | -2.718818 | -0.201542 |
| H | 0.825786  | -2.443529 | -1.818440 |

**Int-III**

|   |           |           |           |
|---|-----------|-----------|-----------|
| N | -2.249046 | 0.051713  | -0.000029 |
| H | -2.798555 | 0.906024  | -0.000200 |
| B | -2.936999 | -1.172394 | 0.000078  |
| H | -2.341575 | -2.213580 | 0.000222  |
| H | -4.142717 | -1.118630 | 0.000036  |
| C | -0.866352 | 0.301809  | -0.000017 |
| C | -0.402760 | 1.631215  | 0.000034  |
| C | 1.281631  | -0.542322 | -0.000044 |
| C | 0.971436  | 1.843389  | 0.000021  |
| H | -1.106304 | 2.466862  | 0.000074  |
| C | 1.835217  | 0.745979  | 0.000011  |
| H | 1.369026  | 2.861307  | 0.000067  |
| H | 2.918045  | 0.881992  | 0.000039  |

|   |           |           |           |
|---|-----------|-----------|-----------|
| N | -0.042680 | -0.741899 | -0.000110 |
| C | 2.142960  | -1.775045 | 0.000021  |
| H | 3.214585  | -1.530900 | 0.000061  |
| H | 1.920892  | -2.394917 | 0.883869  |
| H | 1.920891  | -2.395034 | -0.883737 |

### III-dimer

|   |           |           |           |
|---|-----------|-----------|-----------|
| C | 1.598724  | -0.870938 | -0.456919 |
| C | 3.212595  | 0.579389  | 0.506000  |
| C | 4.245731  | -0.124567 | -0.089891 |
| H | 5.277061  | 0.150086  | 0.131197  |
| N | 1.902602  | 0.260827  | 0.253999  |
| N | 0.341716  | -1.335852 | -0.487065 |
| H | 0.240390  | -2.092651 | -1.153556 |
| B | -0.742913 | -1.333930 | 0.605392  |
| H | -1.275000 | -2.428613 | 0.532578  |
| H | -0.288256 | -1.133447 | 1.714338  |
| C | -1.598770 | 0.871036  | -0.456830 |
| C | -3.212560 | -0.579390 | 0.506078  |
| C | -4.245741 | 0.124451  | -0.089873 |
| H | -5.277053 | -0.150367 | 0.131094  |
| N | -1.902593 | -0.260733 | 0.254102  |
| N | -0.341752 | 1.335926  | -0.487084 |
| H | -0.240463 | 2.092707  | -1.153600 |
| B | 0.742930  | 1.334042  | 0.605324  |
| H | 0.288322  | 1.133593  | 1.714295  |
| H | 1.274980  | 2.428731  | 0.532442  |
| C | -2.637035 | 1.548904  | -1.159177 |
| H | -2.367263 | 2.402578  | -1.783895 |
| C | -3.945866 | 1.173005  | -0.977756 |
| H | -4.748809 | 1.709280  | -1.489568 |
| C | -3.518153 | -1.710187 | 1.443272  |
| H | -3.343214 | -2.688309 | 0.969330  |
| H | -2.882773 | -1.671974 | 2.339791  |
| H | -4.571841 | -1.660016 | 1.750723  |
| C | 3.518302  | 1.710020  | 1.443359  |
| H | 3.343693  | 2.688227  | 0.969478  |
| H | 2.882760  | 1.671880  | 2.339765  |
| H | 4.571925  | 1.659555  | 1.750989  |
| C | 2.636941  | -1.548820 | -1.159315 |
| C | 3.945797  | -1.173061 | -0.977818 |
| H | 2.367134  | -2.402560 | -1.783926 |
| H | 4.748721  | -1.709492 | -1.489495 |

### TS-3

|   |           |           |          |
|---|-----------|-----------|----------|
| N | -0.992572 | -1.909977 | 0.120613 |
|---|-----------|-----------|----------|

|   |           |           |           |
|---|-----------|-----------|-----------|
| H | -1.015943 | -2.805505 | -0.353130 |
| B | -2.175533 | -1.391079 | 0.802436  |
| H | -1.997760 | -0.802187 | 1.842320  |
| H | -3.189635 | -2.025127 | 0.646210  |
| C | -1.705972 | 1.009426  | -0.416619 |
| O | -1.381851 | 2.053751  | -0.835946 |
| O | -2.527772 | 0.159583  | -0.216489 |
| C | 0.169251  | -1.206285 | 0.001165  |
| C | 1.392469  | -1.816664 | -0.361255 |
| C | 1.224233  | 0.873729  | 0.281883  |
| C | 2.536453  | -1.040787 | -0.375608 |
| H | 1.415693  | -2.883956 | -0.588909 |
| C | 2.464463  | 0.314223  | -0.019425 |
| H | 3.498319  | -1.488585 | -0.637626 |
| H | 3.362343  | 0.932337  | 0.021504  |
| N | 0.099864  | 0.121082  | 0.249491  |
| C | 1.104484  | 2.323341  | 0.659731  |
| H | 0.829177  | 2.941300  | -0.208182 |
| H | 2.062182  | 2.694191  | 1.051765  |
| H | 0.326942  | 2.466624  | 1.423384  |

### Int-IV

|   |           |           |           |
|---|-----------|-----------|-----------|
| C | 0.123887  | -1.213827 | -0.048631 |
| C | -1.289510 | 0.743819  | 0.200009  |
| C | -2.401997 | -0.050481 | 0.074686  |
| H | -3.385616 | 0.396599  | 0.215697  |
| N | -0.028994 | 0.168022  | 0.055280  |
| N | 1.335873  | -1.702336 | 0.086556  |
| H | 1.439604  | -2.699267 | -0.067837 |
| B | 2.488278  | -0.821611 | 0.623620  |
| H | 2.355050  | -0.653822 | 1.835279  |
| H | 3.568091  | -1.289559 | 0.314515  |
| C | 1.144895  | 1.032394  | -0.302668 |
| O | 0.929917  | 2.103828  | -0.806880 |
| O | 2.292818  | 0.504070  | -0.087859 |
| C | -1.418423 | 2.196526  | 0.545916  |
| H | -0.663556 | 2.503931  | 1.283621  |
| H | -1.282129 | 2.837034  | -0.335076 |
| H | -2.418676 | 2.370410  | 0.965507  |
| C | -1.037233 | -2.007726 | -0.292153 |
| H | -0.900162 | -3.075678 | -0.467423 |
| C | -2.273977 | -1.428917 | -0.229822 |
| H | -3.169890 | -2.035300 | -0.381349 |

### TS-4

|   |           |           |           |
|---|-----------|-----------|-----------|
| N | -0.455389 | -0.524929 | -0.332506 |
|---|-----------|-----------|-----------|

|   |           |           |           |              |           |           |           |
|---|-----------|-----------|-----------|--------------|-----------|-----------|-----------|
| C | -1.534105 | -1.054945 | 0.522610  | H            | 3.824468  | 3.000832  | 0.123428  |
| H | -1.488103 | -2.149217 | 0.446057  | H            | 4.265235  | 1.295696  | -1.663013 |
| C | -2.926841 | -0.585007 | 0.158455  | N            | 2.178327  | -0.490956 | 0.281185  |
| C | -3.931793 | -0.652716 | 1.134509  | C            | 3.289605  | -1.170494 | -1.890374 |
| C | -3.259496 | -0.117113 | -1.119474 | H            | 4.165009  | -0.819688 | -2.451973 |
| C | -5.241650 | -0.269906 | 0.840713  | H            | 3.501070  | -2.168160 | -1.484048 |
| H | -3.683111 | -1.011325 | 2.137627  | H            | 2.450970  | -1.277792 | -2.591474 |
| C | -4.569501 | 0.269931  | -1.413999 |              |           |           |           |
| H | -2.494982 | -0.046096 | -1.893911 | <b>Int-V</b> |           |           |           |
| C | -5.565201 | 0.194447  | -0.437436 | N            | -0.461936 | -0.604280 | -0.146214 |
| H | -6.011444 | -0.329610 | 1.614267  | C            | -1.440335 | -1.021304 | 0.933384  |
| H | -4.811207 | 0.633478  | -2.415837 | H            | -1.377056 | -2.109546 | 1.009692  |
| H | -6.588677 | 0.498583  | -0.669932 | C            | -2.846976 | -0.576850 | 0.615772  |
| C | -0.314407 | 0.892835  | -0.342937 | C            | -3.287973 | 0.709267  | 0.966492  |
| C | 0.298271  | 1.556490  | -1.419469 | C            | -3.741687 | -1.442348 | -0.031042 |
| C | -0.745136 | 1.667729  | 0.754068  | C            | -4.584931 | 1.126001  | 0.662664  |
| C | 0.485087  | 2.938004  | -1.394415 | H            | -2.610964 | 1.391373  | 1.483852  |
| H | 0.627084  | 0.985571  | -2.282986 | C            | -5.040182 | -1.027085 | -0.334876 |
| C | -0.562146 | 3.049007  | 0.768246  | H            | -3.419362 | -2.450726 | -0.295065 |
| H | -1.227027 | 1.194815  | 1.606911  | C            | -5.463509 | 0.259849  | 0.006050  |
| C | 0.058719  | 3.696423  | -0.303021 | H            | -4.911371 | 2.130231  | 0.943851  |
| H | 0.966532  | 3.423980  | -2.246489 | H            | -5.724625 | -1.715043 | -0.836970 |
| H | -0.913014 | 3.623878  | 1.628786  | H            | -6.479571 | 0.584450  | -0.231770 |
| H | 0.199735  | 4.779466  | -0.289962 | C            | -0.376820 | 0.854142  | -0.213357 |
| H | -1.330341 | -0.824463 | 1.577183  | C            | -0.827002 | 1.555903  | -1.331710 |
| B | -0.177838 | -1.434980 | -1.593439 | C            | 0.108626  | 1.557012  | 0.898047  |
| H | 0.229235  | -0.860209 | -2.572936 | C            | -0.756129 | 2.951604  | -1.352936 |
| H | -1.066730 | -2.224408 | -1.802665 | H            | -1.243473 | 1.015108  | -2.178160 |
| N | 1.497633  | -0.110099 | 2.469838  | C            | 0.188870  | 2.947773  | 0.867249  |
| H | 1.386437  | 0.557343  | 3.226011  | H            | 0.416515  | 1.022213  | 1.795896  |
| B | 1.228941  | -1.608575 | 2.722438  | C            | -0.239384 | 3.651404  | -0.262532 |
| H | 2.228947  | -2.179271 | 3.133934  | H            | -1.114629 | 3.490674  | -2.232598 |
| H | 0.251200  | -1.760989 | 3.429647  | H            | 0.582391  | 3.482664  | 1.734374  |
| C | 1.180055  | -1.549437 | 0.254065  | H            | -0.180283 | 4.741849  | -0.285810 |
| O | 1.032068  | -2.201456 | -0.909632 | H            | -1.103090 | -0.595697 | 1.884207  |
| O | 0.921845  | -2.162159 | 1.322947  | B            | -0.636456 | -1.500457 | -1.506695 |
| B | 1.369946  | -3.805201 | -1.079320 | H            | -0.787999 | -0.879648 | -2.527294 |
| H | 1.469527  | -3.916012 | -2.289225 | H            | -1.409591 | -2.406355 | -1.331384 |
| H | 0.427652  | -4.403728 | -0.592490 | C            | 2.680335  | -0.171937 | 1.260828  |
| H | 2.423529  | -3.951370 | -0.479433 | C            | 2.552161  | 0.295111  | -1.121479 |
| C | 2.101991  | 0.354049  | 1.396296  | C            | 3.467565  | 1.306492  | -0.956789 |
| C | 2.648670  | 1.661745  | 1.297497  | H            | 3.791986  | 1.854684  | -1.839258 |
| C | 3.382657  | 2.005361  | 0.197926  | N            | 2.121628  | -0.425480 | 0.005506  |
| H | 2.493653  | 2.343017  | 2.134006  | N            | 2.293522  | -0.857284 | 2.316063  |
| C | 3.003885  | -0.174561 | -0.809506 | H            | 2.746771  | -0.577901 | 3.180208  |
| C | 3.605304  | 1.058204  | -0.829757 | B            | 1.358682  | -2.077973 | 2.345869  |

|   |          |           |           |   |           |           |           |
|---|----------|-----------|-----------|---|-----------|-----------|-----------|
| H | 1.952996 | -3.065616 | 2.754079  | H | -2.082499 | 0.876399  | -1.782489 |
| H | 0.370068 | -1.834599 | 3.033808  | C | -0.303390 | 2.804014  | 1.072561  |
| C | 0.978410 | -1.400601 | -0.032588 | H | 0.496417  | 0.890054  | 1.666482  |
| O | 0.815773 | -1.941599 | -1.295073 | C | -1.109841 | 3.494468  | 0.165266  |
| O | 0.999187 | -2.296267 | 0.901179  | H | -2.399857 | 3.318211  | -1.564747 |
| B | 1.592513 | -3.245514 | -1.832349 | H | 0.196949  | 3.337380  | 1.883585  |
| H | 2.756463 | -3.069947 | -1.498016 | H | -1.245532 | 4.574079  | 0.261574  |
| H | 1.072315 | -4.220964 | -1.318549 | H | -1.316063 | -1.167789 | 1.756618  |
| H | 1.419704 | -3.175889 | -3.041138 | B | -0.633192 | -1.308159 | -1.770914 |
| C | 3.632444 | 0.884183  | 1.395083  | H | -0.624187 | -0.471121 | -2.623821 |
| C | 4.006861 | 1.617598  | 0.310419  | H | -1.349389 | -2.265905 | -1.883659 |
| H | 4.728831 | 2.430472  | 0.413548  | N | 2.949989  | -1.007085 | 2.081431  |
| H | 4.033455 | 1.070941  | 2.391937  | H | 3.708015  | -1.472395 | 2.567221  |
| C | 2.106931 | -0.013048 | -2.519385 | B | 1.581911  | -1.484067 | 2.371001  |
| H | 2.428706 | -1.017591 | -2.826848 | H | 1.556278  | -2.452915 | 3.097834  |
| H | 1.023011 | 0.033630  | -2.661902 | H | 0.725025  | -0.659225 | 2.599902  |
| H | 2.569273 | 0.724180  | -3.186910 | C | 0.663664  | -1.461975 | -0.104280 |

#### TS-5

|   |           |           |           |   |          |           |           |
|---|-----------|-----------|-----------|---|----------|-----------|-----------|
| N | -0.654731 | -0.728842 | -0.210490 | O | 1.087849 | -2.099067 | 0.841081  |
| C | -1.661774 | -1.395788 | 0.741263  | B | 1.896687 | -2.824998 | -2.064473 |
| H | -1.575347 | -2.474956 | 0.569031  | H | 2.980238 | -2.422708 | -1.692361 |
| C | -3.063993 | -0.910810 | 0.514630  | H | 1.657211 | -2.659722 | -3.245185 |
| C | -3.563162 | 0.167049  | 1.260584  | H | 1.564370 | -3.907573 | -1.614991 |
| C | -3.881062 | -1.502891 | -0.459624 | C | 3.381673 | -0.226088 | 1.046056  |
| C | -4.850949 | 0.652195  | 1.030805  | C | 4.757121 | 0.114030  | 0.952079  |
| H | -2.931793 | 0.636005  | 2.018322  | C | 2.917779 | 0.953836  | -0.915723 |
| C | -5.169076 | -1.016221 | -0.691943 | C | 5.183012 | 0.896810  | -0.101119 |
| H | -3.507387 | -2.348881 | -1.039301 | H | 5.450894 | -0.248913 | 1.713369  |
| C | -5.654542 | 0.064355  | 0.049912  | C | 4.251972 | 1.334618  | -1.052754 |
| H | -5.226997 | 1.493304  | 1.617707  | H | 6.237063 | 1.171645  | -0.191238 |
| H | -5.797258 | -1.485878 | -1.452427 | H | 4.556509 | 1.957898  | -1.894310 |
| H | -6.662768 | 0.444250  | -0.132199 | C | 1.900266 | 1.412924  | -1.920986 |
| C | -0.740985 | 0.742474  | -0.092117 | H | 1.323099 | 0.570324  | -2.322835 |
| C | -1.570092 | 1.417784  | -0.989806 | H | 1.187780 | 2.116045  | -1.464519 |
| C | -0.124269 | 1.424062  | 0.954999  | H | 2.388920 | 1.920953  | -2.763441 |
| C | -1.750935 | 2.794946  | -0.859519 | N | 2.495625 | 0.184718  | 0.113104  |

#### 4. References

1. L. Zhu, L.-S. Wang, B. Li, W. Li, B. Fu, *Catal. Sci. Technol.* 2016, **6**, 6172-6176.
2. K. Beydoun, G. Ghattas, K. Thenert, J. Klankermayer, W. Leitner, *Angew. Chem. Int. Ed.* 2014, **53**, 11010-11014.
3. F. Liu, Y.-R. Zhu, L.-G. Song, J.-M. Lu, *Org. Biomol. Chem.* 2016, **14**, 2563-2571.
4. A. Ilie, G.-D. Roiban, M.T. Reetz, *ChemistrySelect.* 2017, **2**, 1392-1397.
5. N. Matsuda, K. Hirano, T. Satoh, M. Miura, *Angew. Chem. Int. Ed.* 2012, **51**, 3642-3645.
6. X.-J. Xu, A. Amuti, A. Wusiman, *Adv. Synth. Catal.* 2020, **362**, 5002-5008.
7. N. Purkait, G. Kervefors, E. Linde, B. Olofsson, *Angew. Chem. Int. Ed.* 2018, **57**, 11427-11431.
8. Y. Zhao, S. Zhang, Y. Yamamoto, M. Bao, T. Jin, M. Terada, *Adv. Synth. Catal.* 2019, **361**, 4817-4824.
9. W. Liang, F. Xie, Z. Yang, Z. Zeng, C. Xia, Y. Li, *Org. Lett.* 2020, **22**, 8291-8295.
10. R. Sakae, K. Hirano, T. Satoh, M. Miura, *Chem. Lett.* 2013, **42**, 1128-1130.
11. G. Onodera, H. Kumagae, D. Nakamura, T. Hayasaki, T. Fukuda, M. Kimura, *Tetrahedron Lett.* 2020, **61**, 152537.
12. J.R. Bernardo, S.C.A. Sousa, P.R. Florindo, M. Wolff, B. Machura, A.C. Fernandes, *Tetrahedron.* 2013, **69**, 9145-9154.
13. Y.-Y. Gui, L.-L. Liao, L. Sun, Z. Zhang, J.-H. Ye, G. Shen, *ChemComm.* 2017, **53**, 1192-1195.
14. H.-Y. Zhao, X.-Y. Yang, H. Lei, M. Xin, S.-Q. Zhang, *Synth Commun.* 2019, **49**, 1406-1415.
15. I. Sorribes, J.R. Cabrero-Antonino, C. Vicent, K. Junge, M. Beller, *J. Am. Chem. Soc.* 2015, **137**, 13580-13587.
16. H. Liu, D. Yang, D.-L. Wang, P. Wang, Y. Lu, V.-T. Giang, *ChemComm.* 2018, **54**, 7979-7982.
17. Z. Wang, D. Pei, Y. Zhang, C. Wang, J. Sun, *Molecules.* 2012, **17**, 5151-5163.
18. O.S. Nayal, M.S. Thakur, V. Bhatt, M. Kumar, N. Kumar, B. Singh, *ChemComm.* 2016, **52**, 9648-9651.
19. O.-Y. Lee, K.-L. Law, C.-Y. Ho, D. Yang, *J. Org. Chem.* 2008, **73**, 8829-8837.
20. B. Lagu, M. Wachter, O. Pharma, USA Patent US20060293379A1, **2006**.

21. Gaussian 09, Revision E.01, M.J. Frisch, G.W. Trucks, H.B. Schlegel, G.E. Scuseria, M.A. Robb, J.R. Cheeseman, G. Scalmani, V. Barone, B. Mennucci, G.A. Petersson, H. Nakatsuji, M. Caricato, X. Li, H.P. Hratchian, A.F. Izmaylov, J. Bloino, G.J. Zheng, L. Sonnenberg, M. Hada, M. Ehara, K. Toyota, R. Fukuda, J. Hasegawa, M. Ishida, T. Nakajima, Y. Honda, O. Kitao, H. Nakai, T. Vreven, J.A. Montgomery, J.E. Peralta, F. Ogliaro, M. Bearpark, J.J. Heyd, E. Brothers, K.N. Kudin, V.N. Staroverov, R. Kobayashi, J. Normand, K. Raghavachari, A. Rendell, J.C. Burant, S.S. Iyengar, J. Tomasi, M. Cossi, N. Rega, J.M. Millam, M.J. Klene, E. Knox, J.B. Cross, V. Bakken, C. Adamo, J. Jaramillo, R. Gomperts, R.E. Stratmann, O. Yazyev, A.J. Austin, R. Cammi, C. Pomelli, J.W. Ochterski, R.L. Martin, K. Morokuma, V.G. Zakrzewski, G.A. Voth, P. Salvador, J.J. Dannenberg, S. Dapprich, A.D. Daniels, Ö. Farkas, J.B. Foresman, J.V. Ortiz, J.D. Cioslowski, J. Fox, I. Gaussian, C.T. Wallingford, 2013.
22. C.T. Lee, W.-T. Yang, R.G. Parr, *Phys. Rev. B.* 1988, **37**, 785.
23. A.D. Becke, *J. Chem. Phys.* 1993, **98**, 5648.
24. S. Grimme, J. Antony, S. Ehrlich, H. Krieg, *J. Chem. Phys.* 2010, **132**, 154104.
25. S. Grimme, S. Ehrlich, L. Goerigk, *J. Comput. Chem.* 2011, **32**, 1456.
26. A.V. Marenich, C.J. Cramer, D.G. Truhlar, *J. Phys. Chem. B.* 2009, **113**, 6378.

## 5. $^1\text{H}$ and $^{13}\text{C}$ NMR Spectra

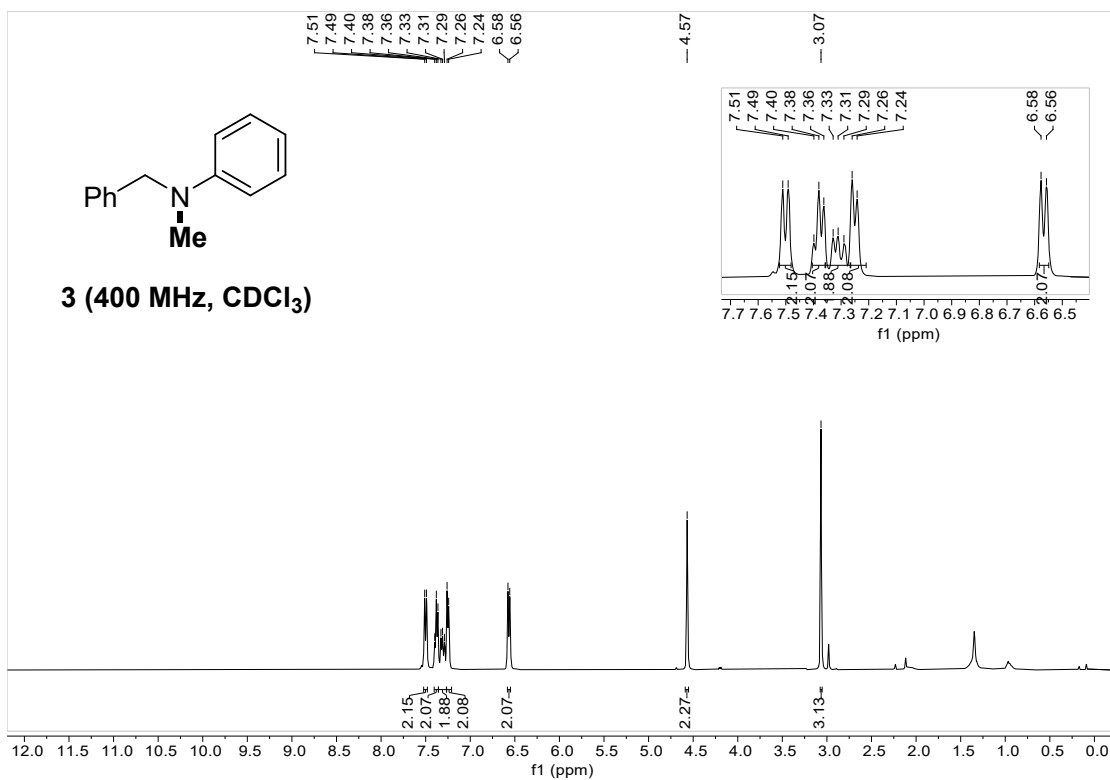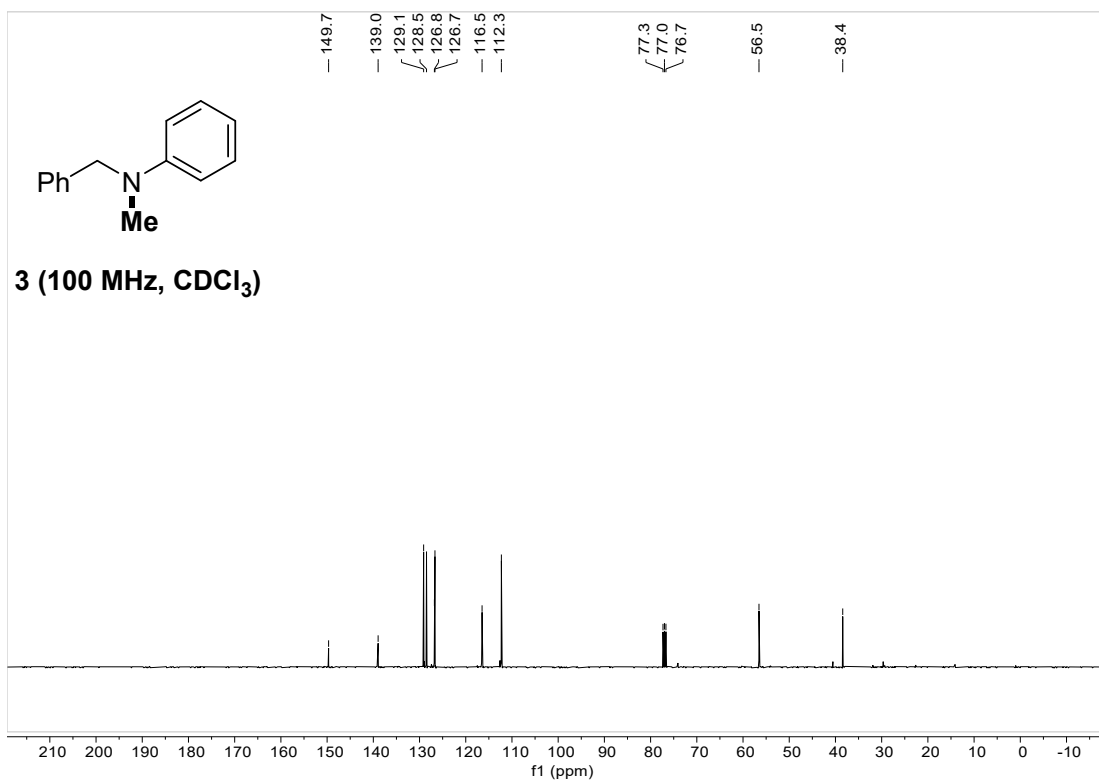



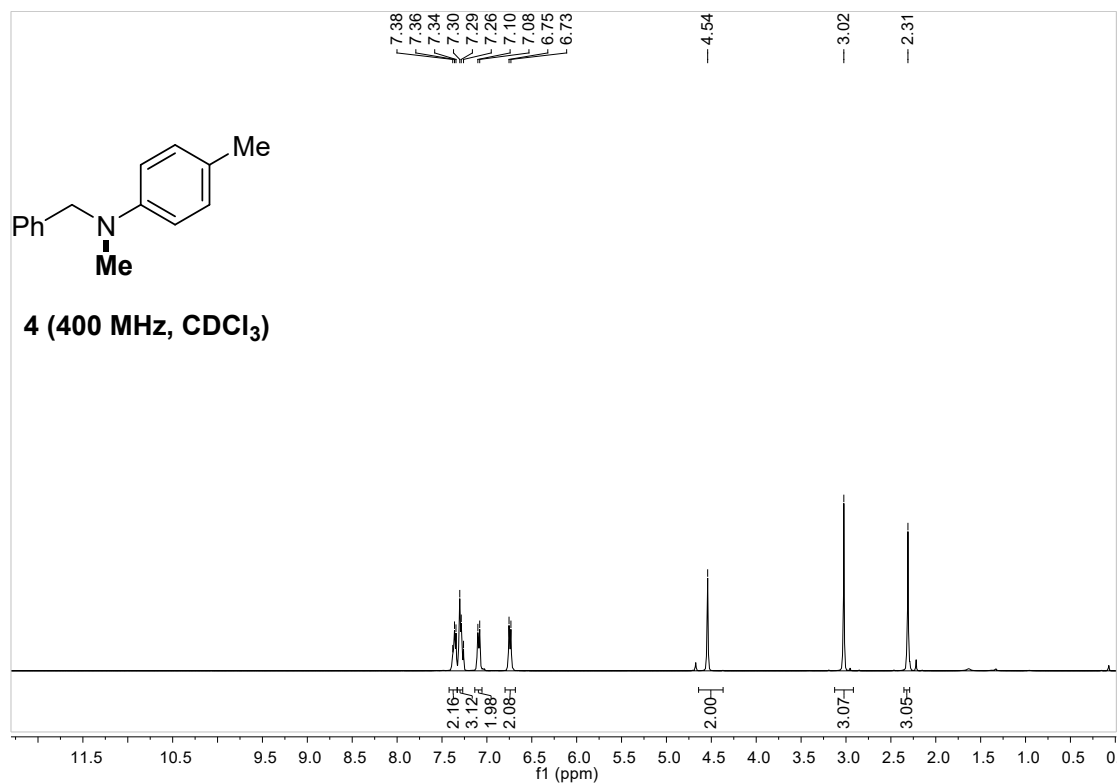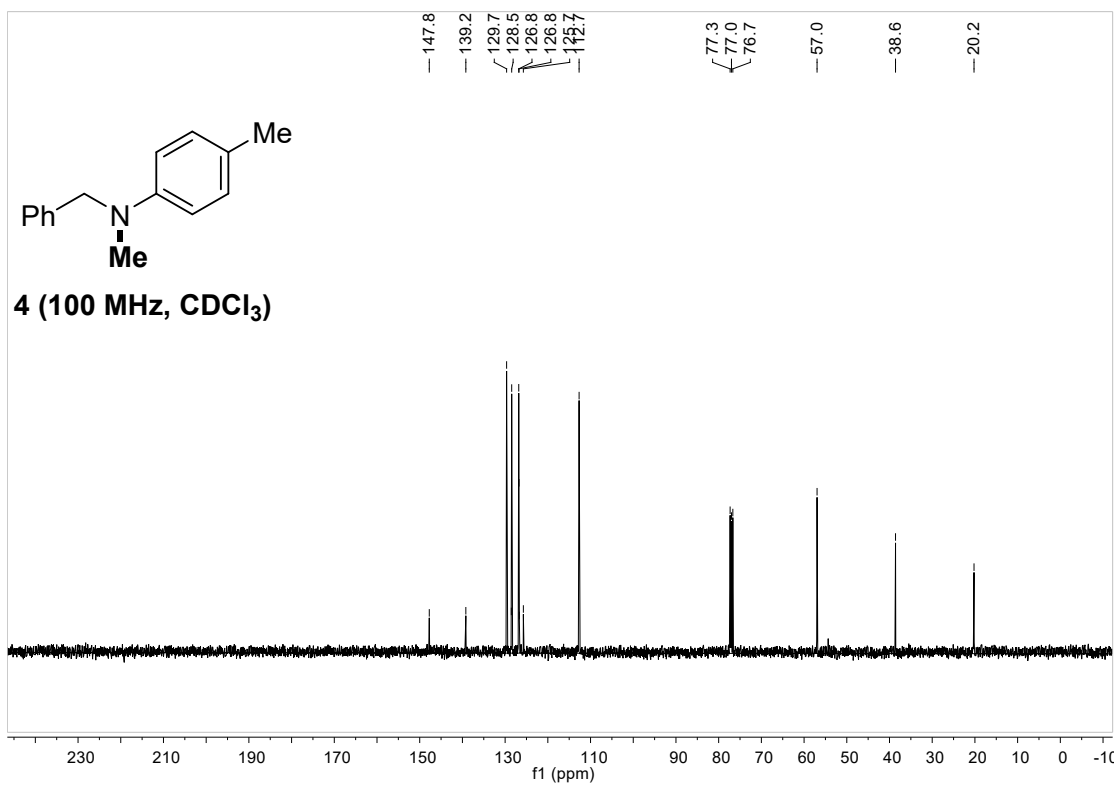

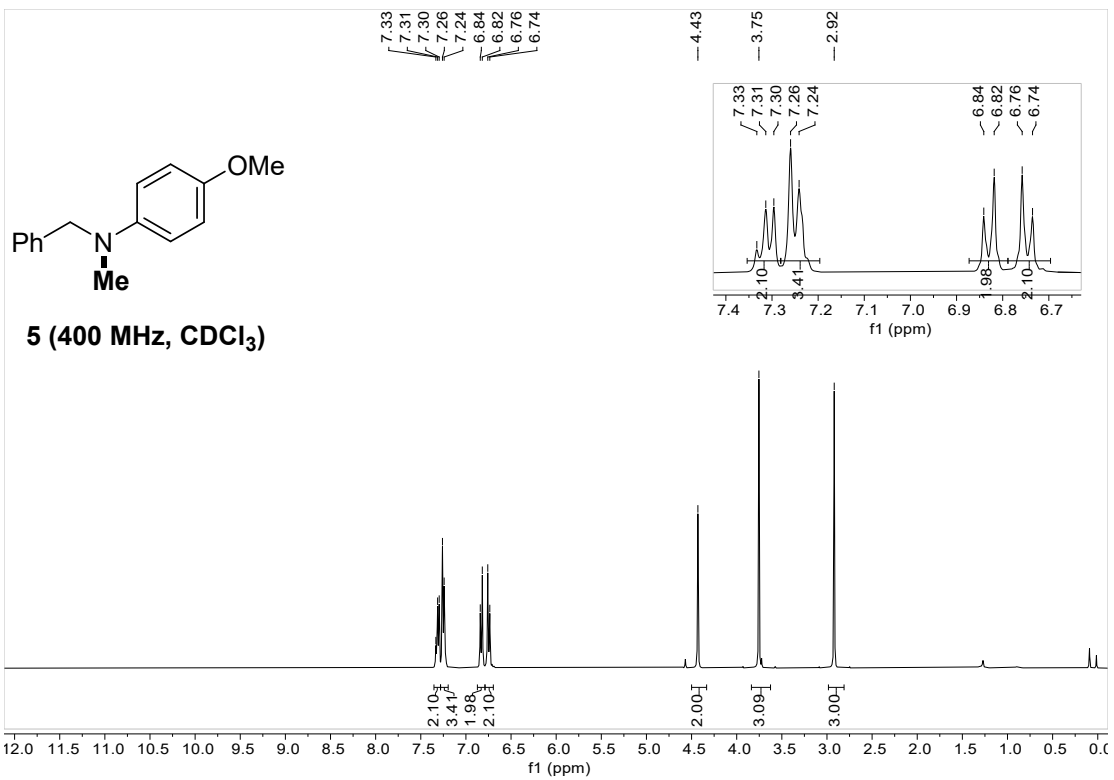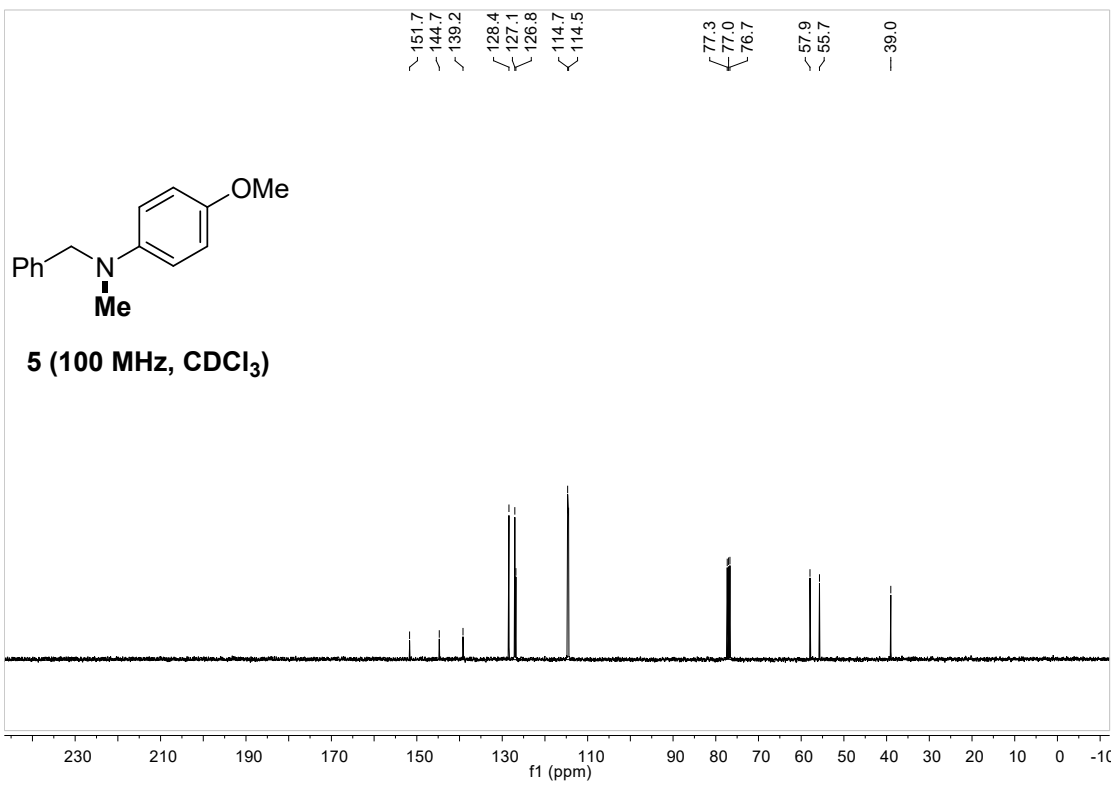

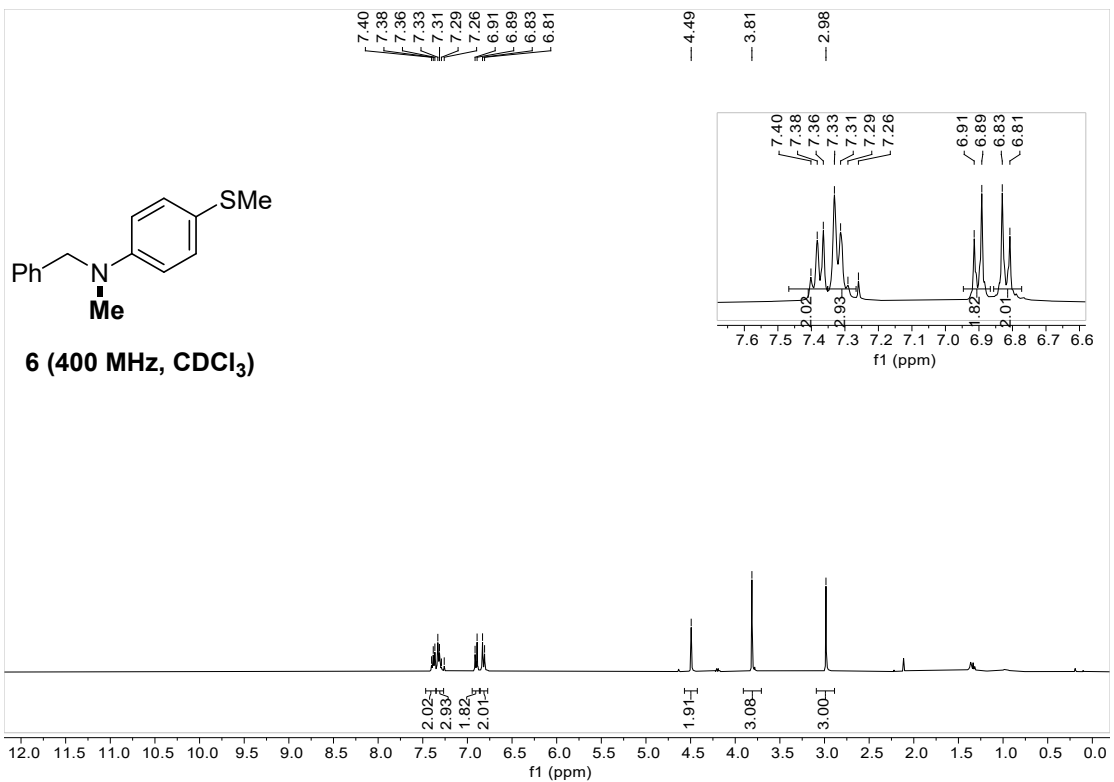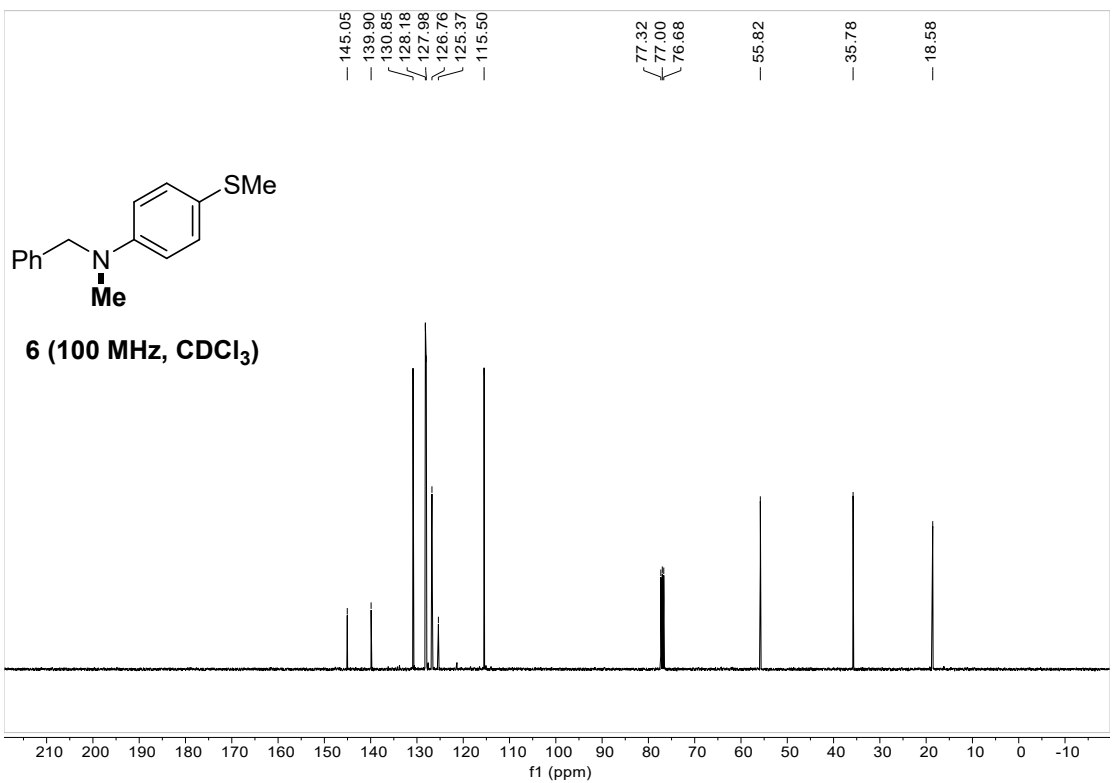

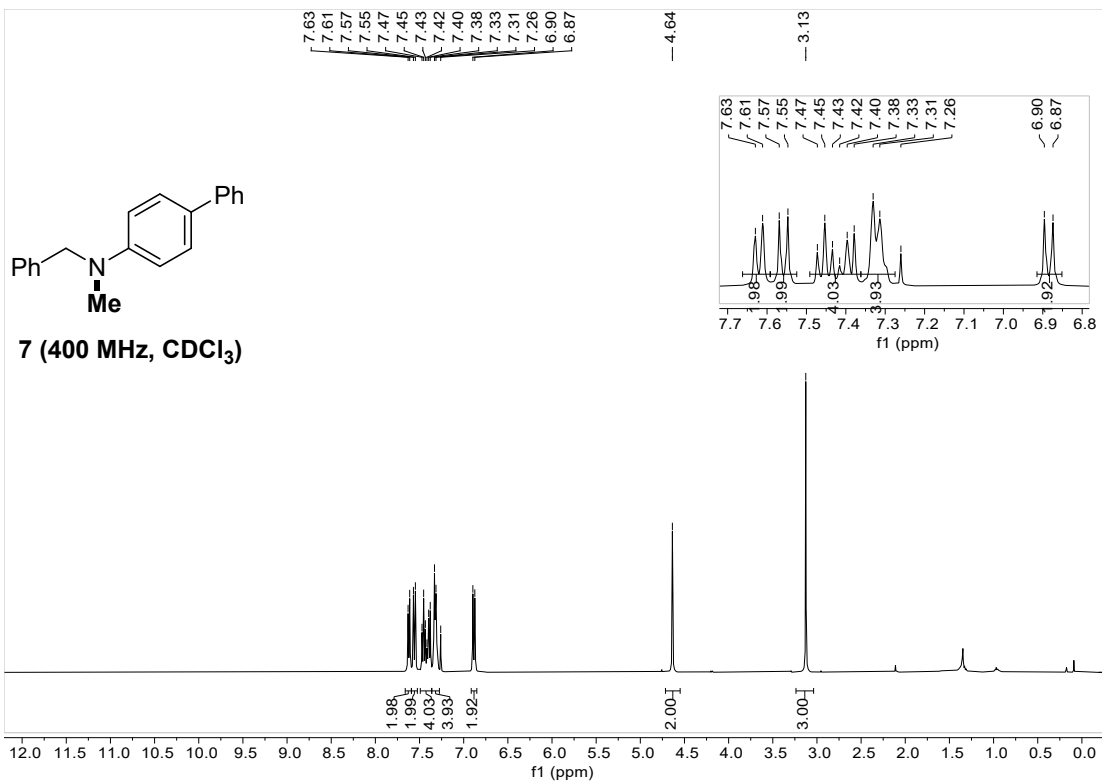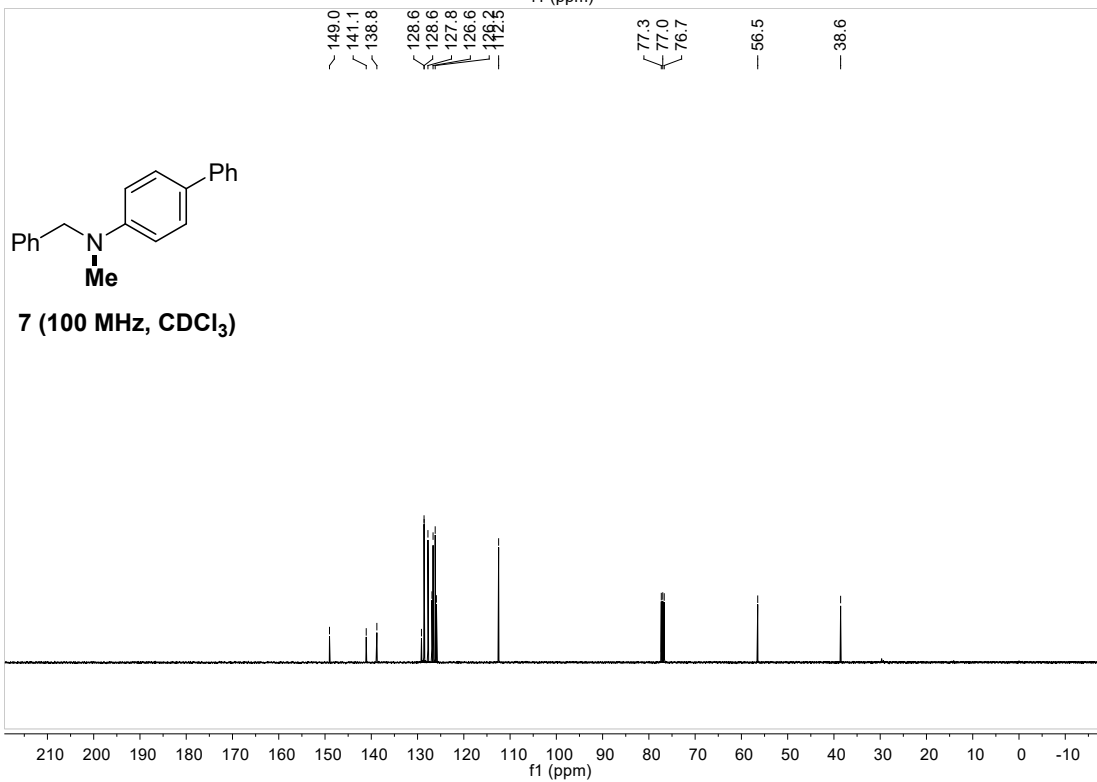

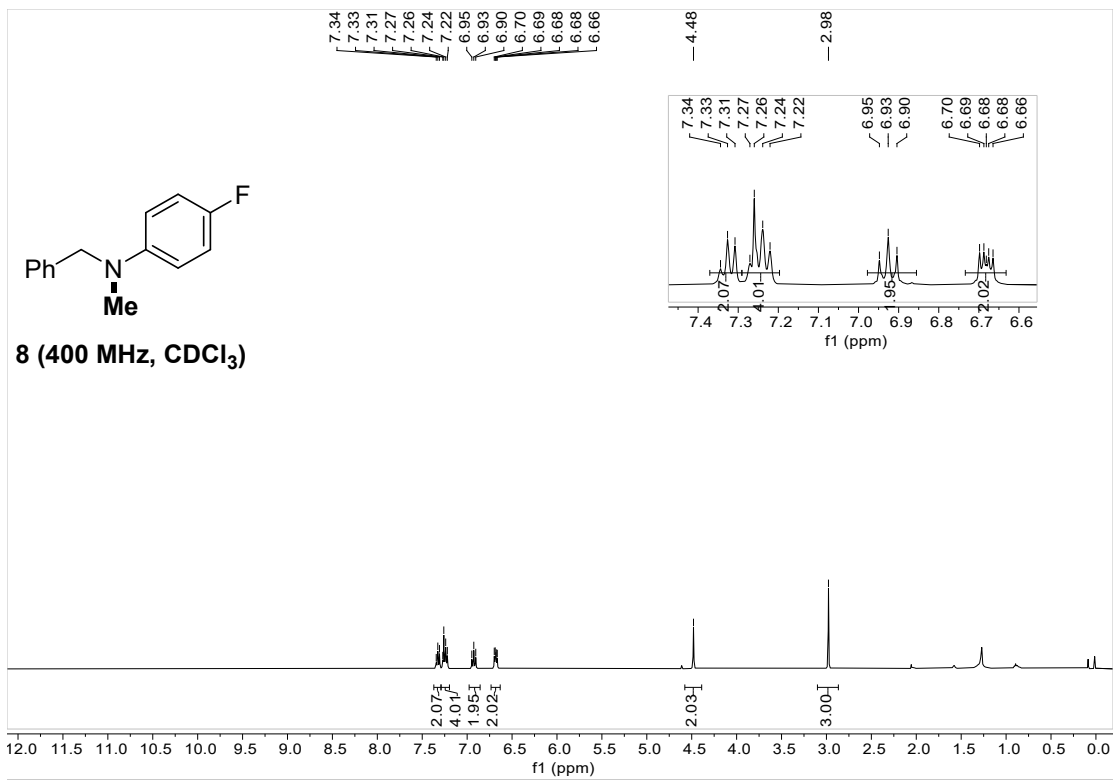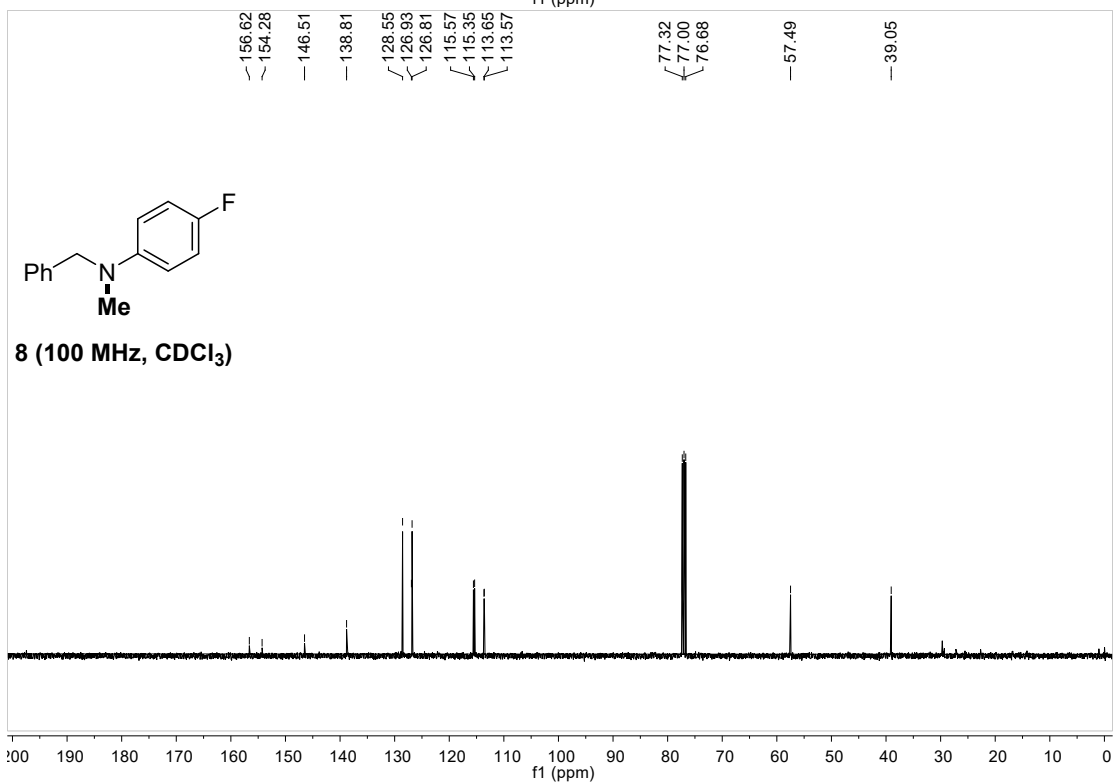

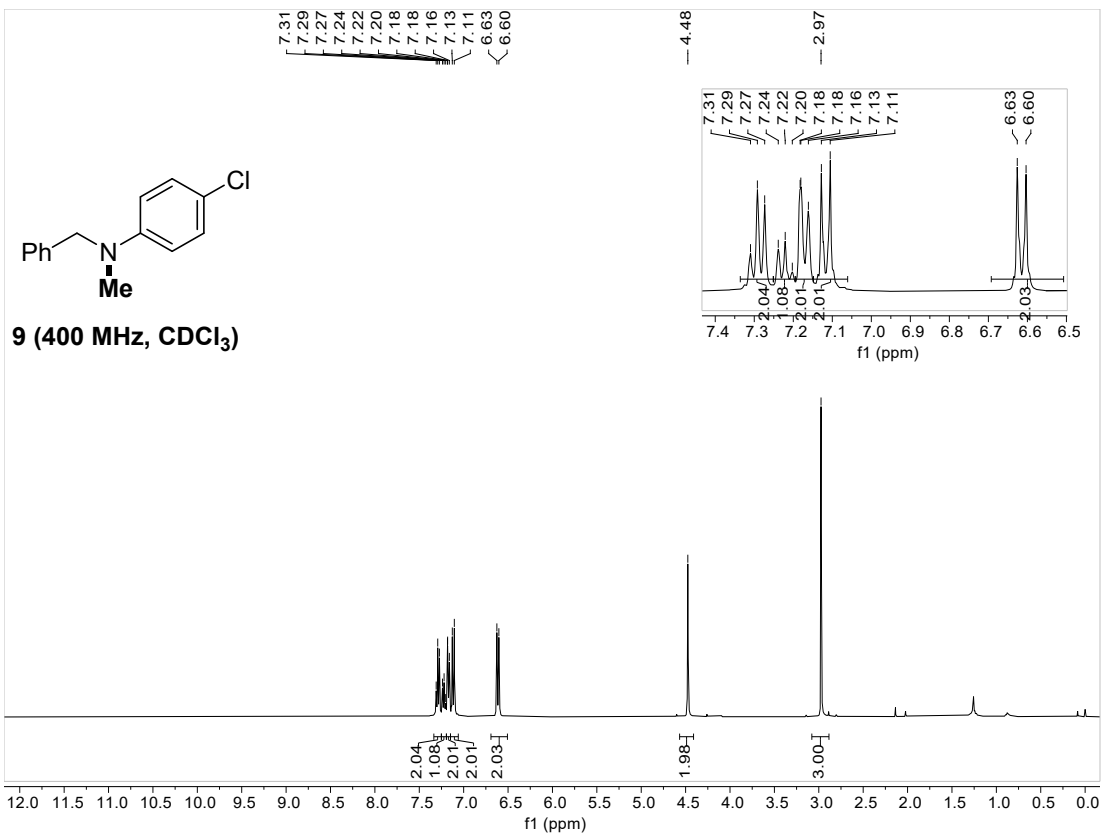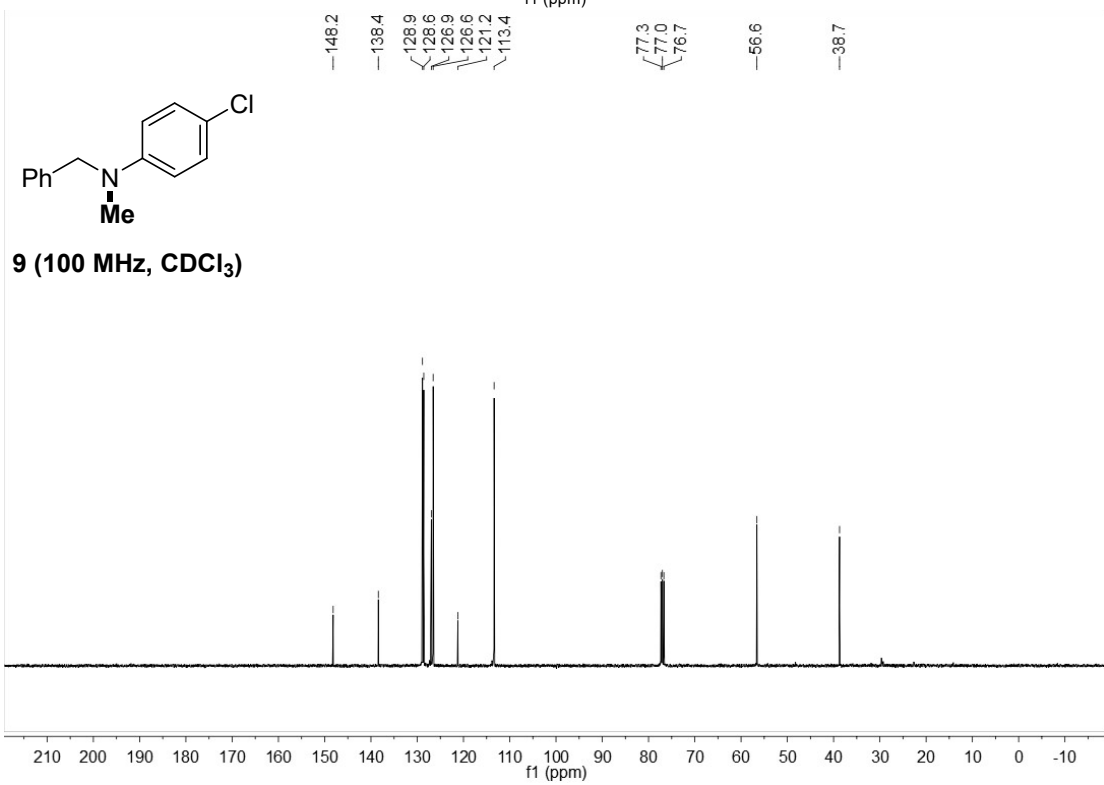

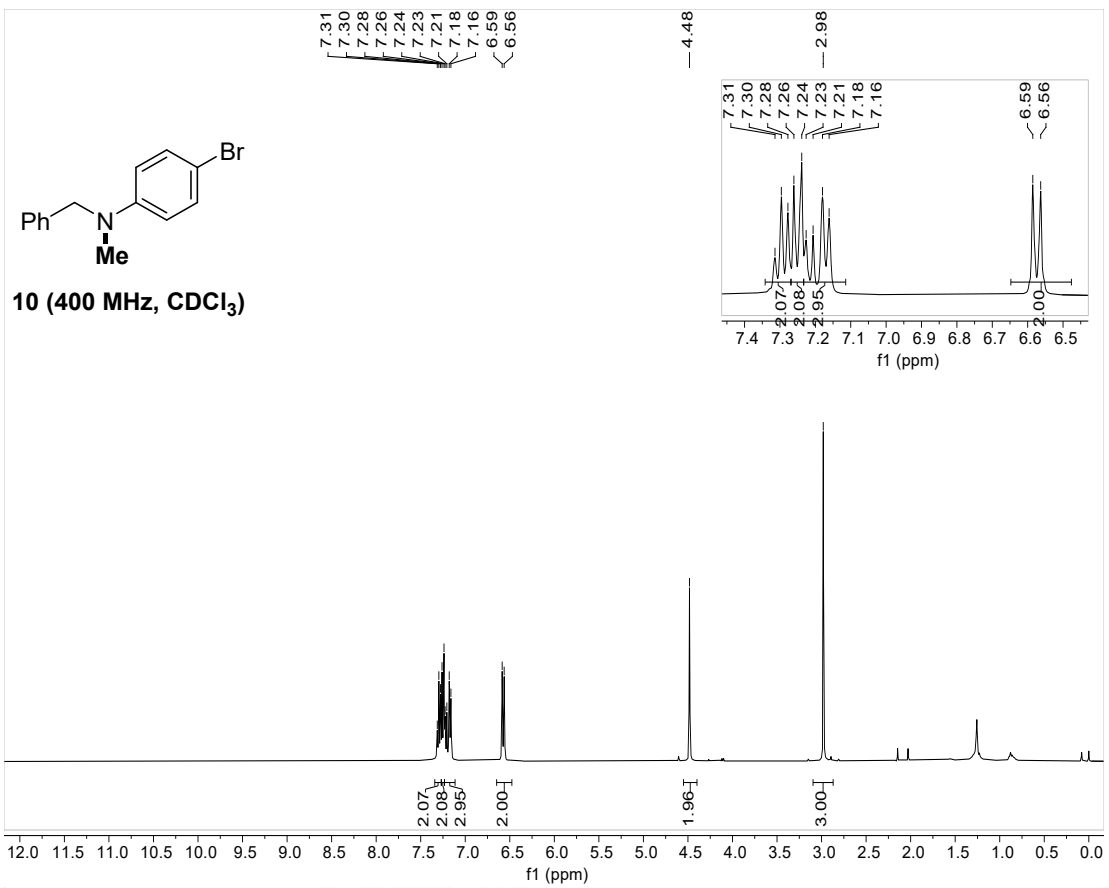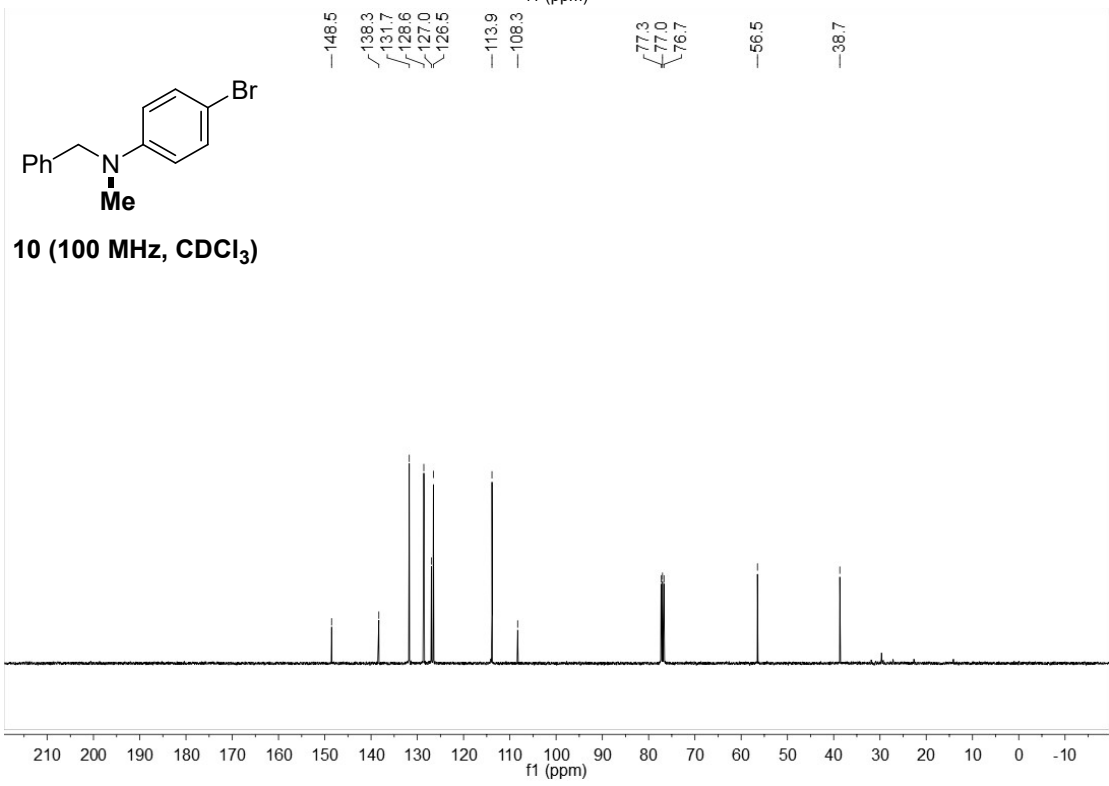

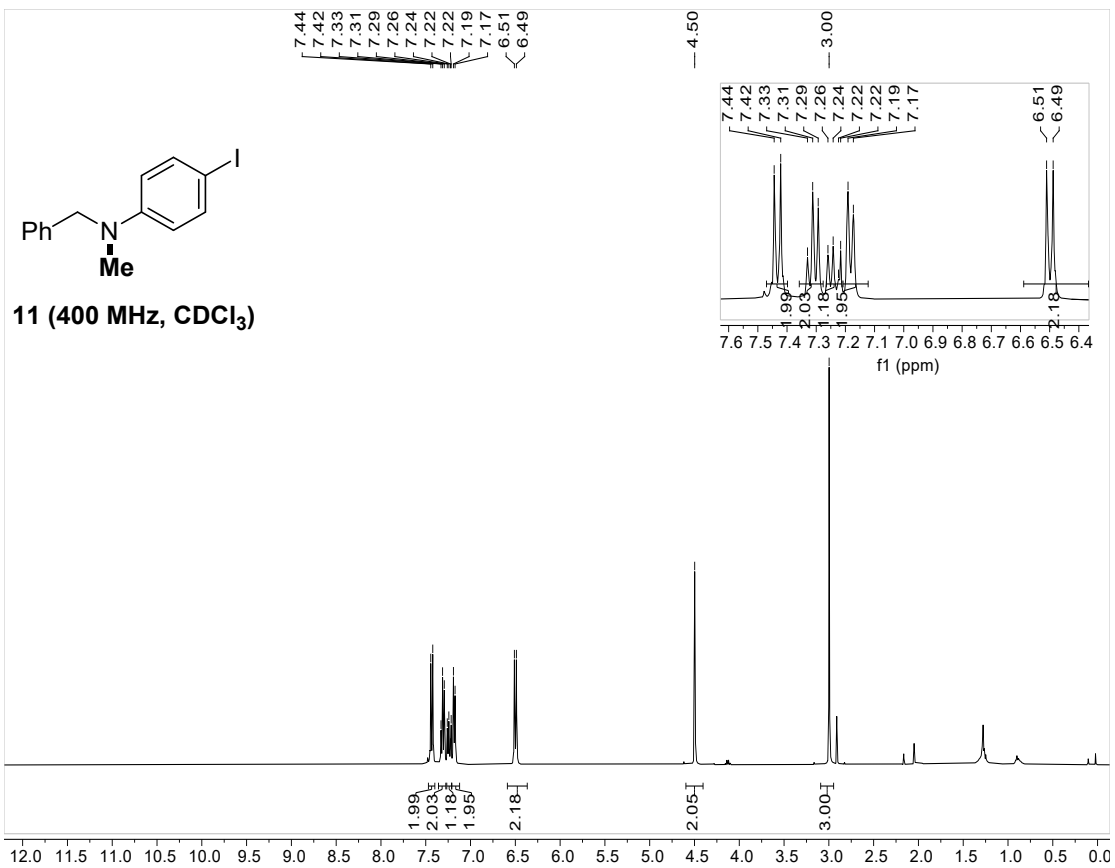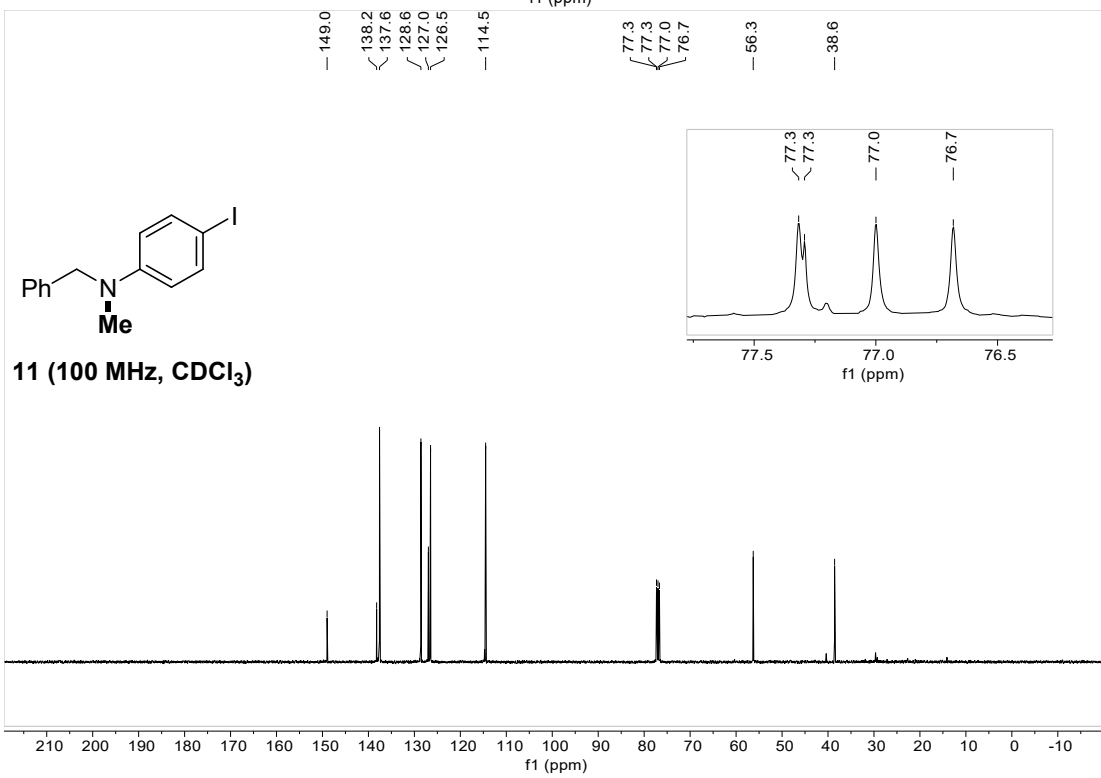



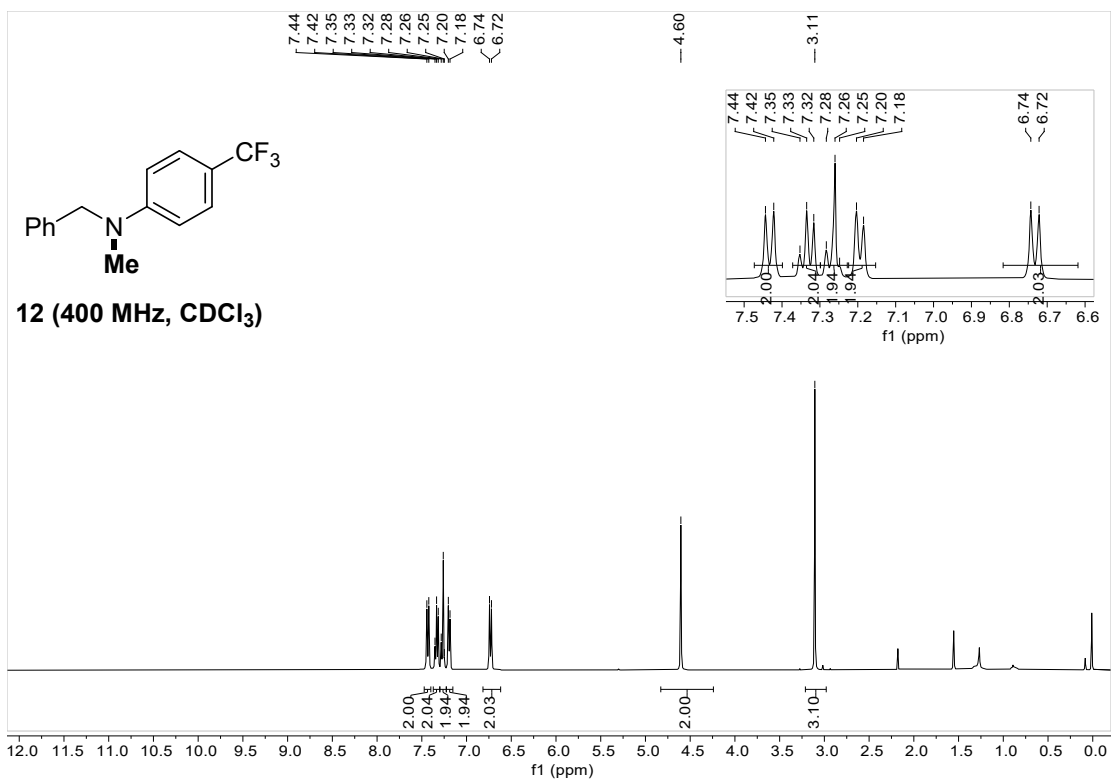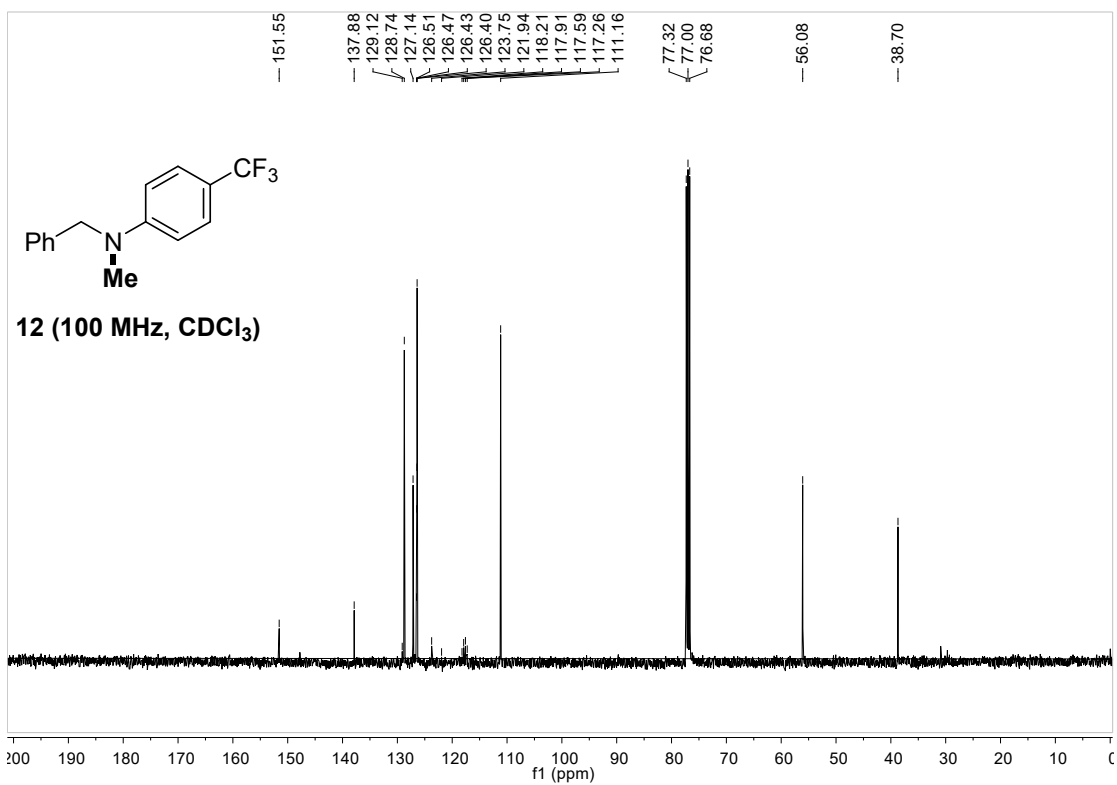

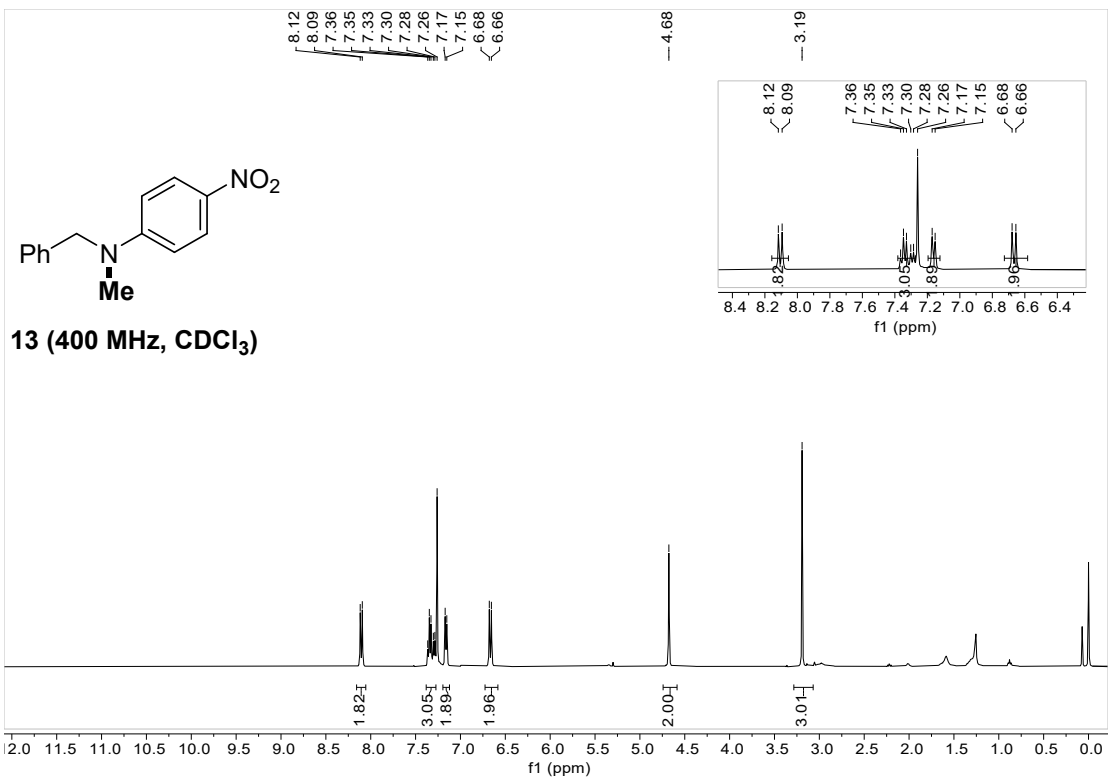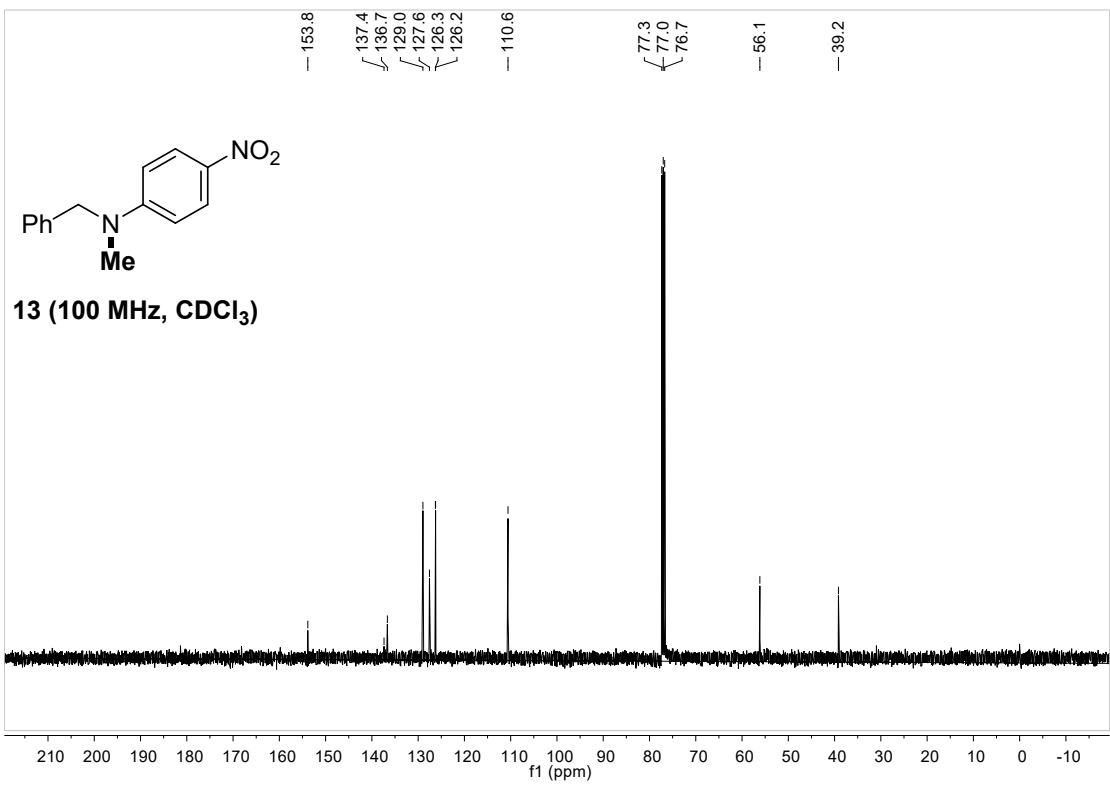

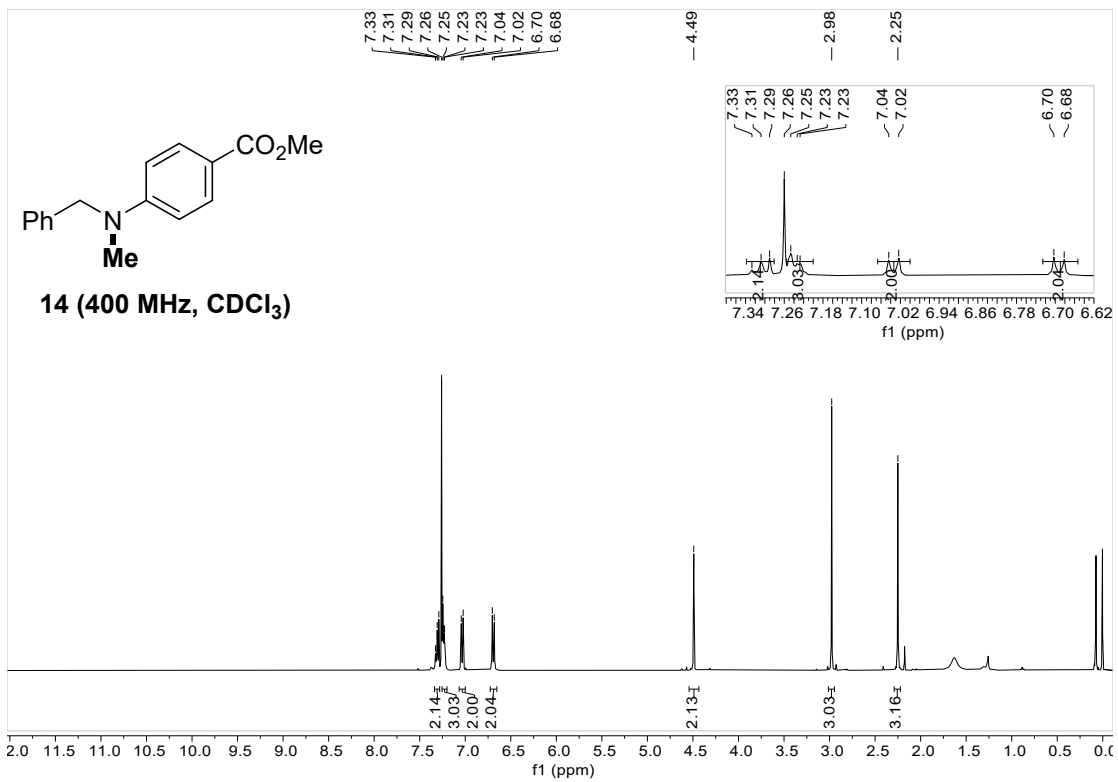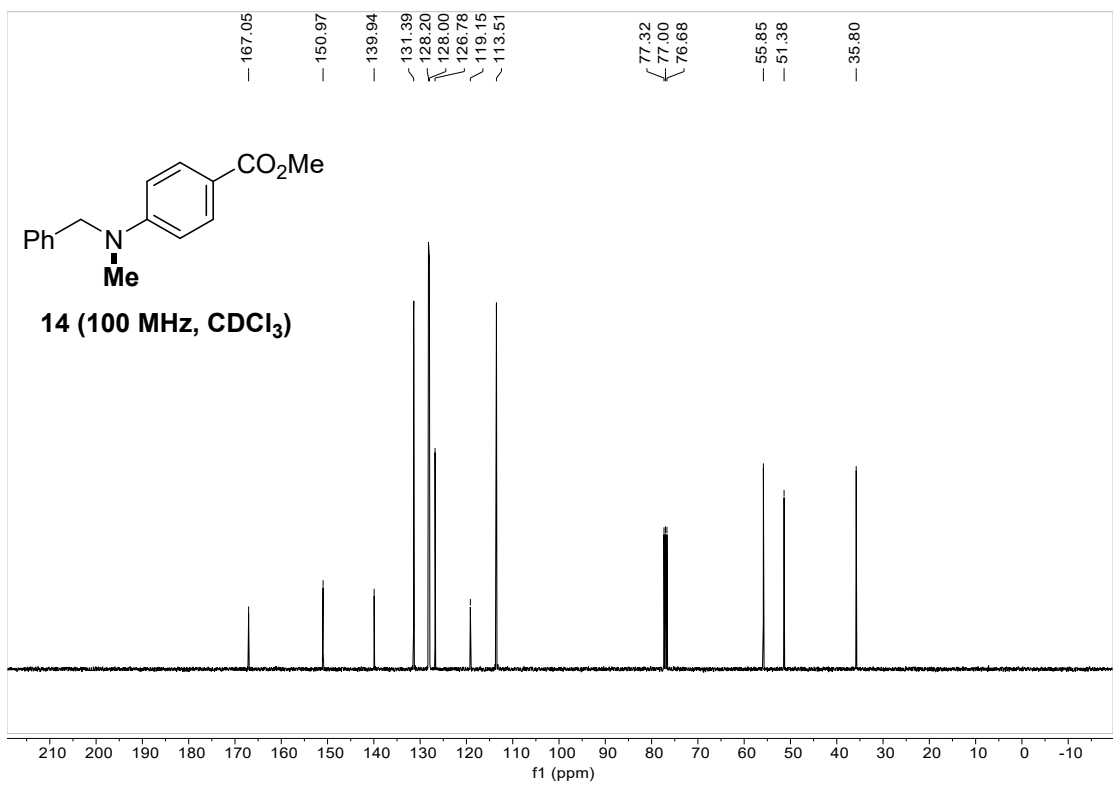

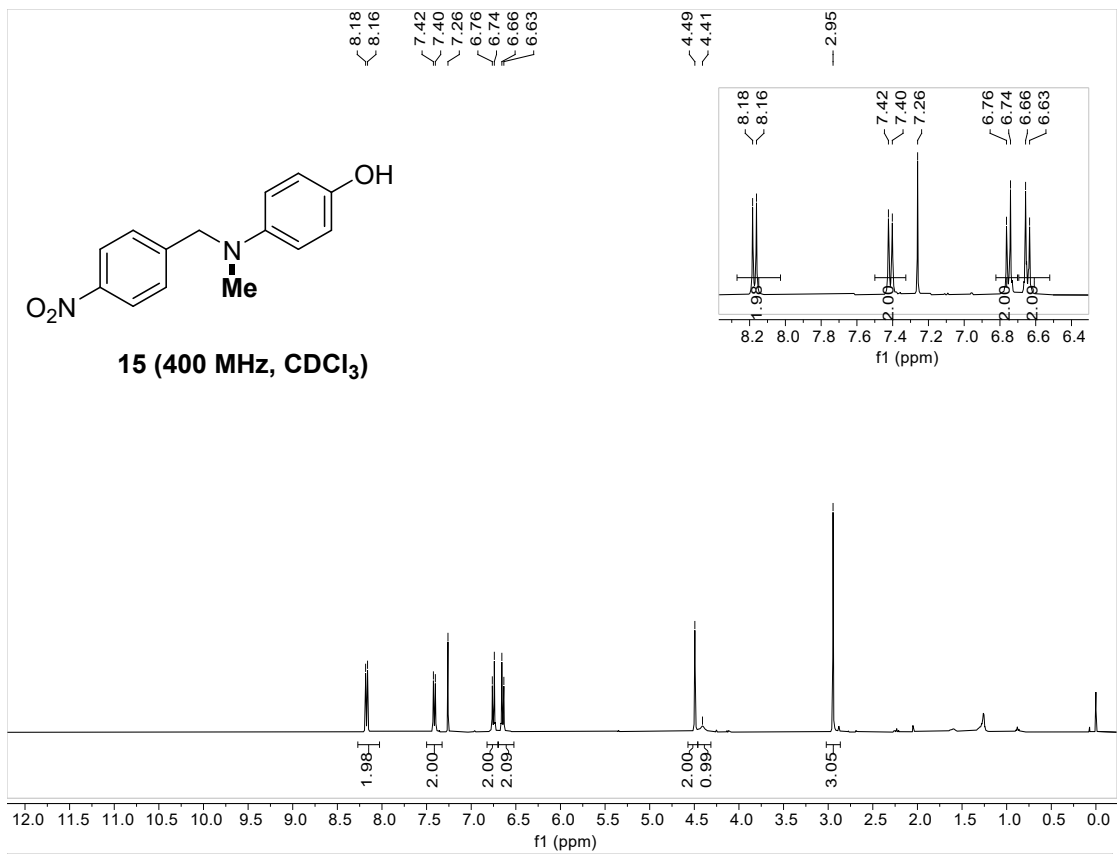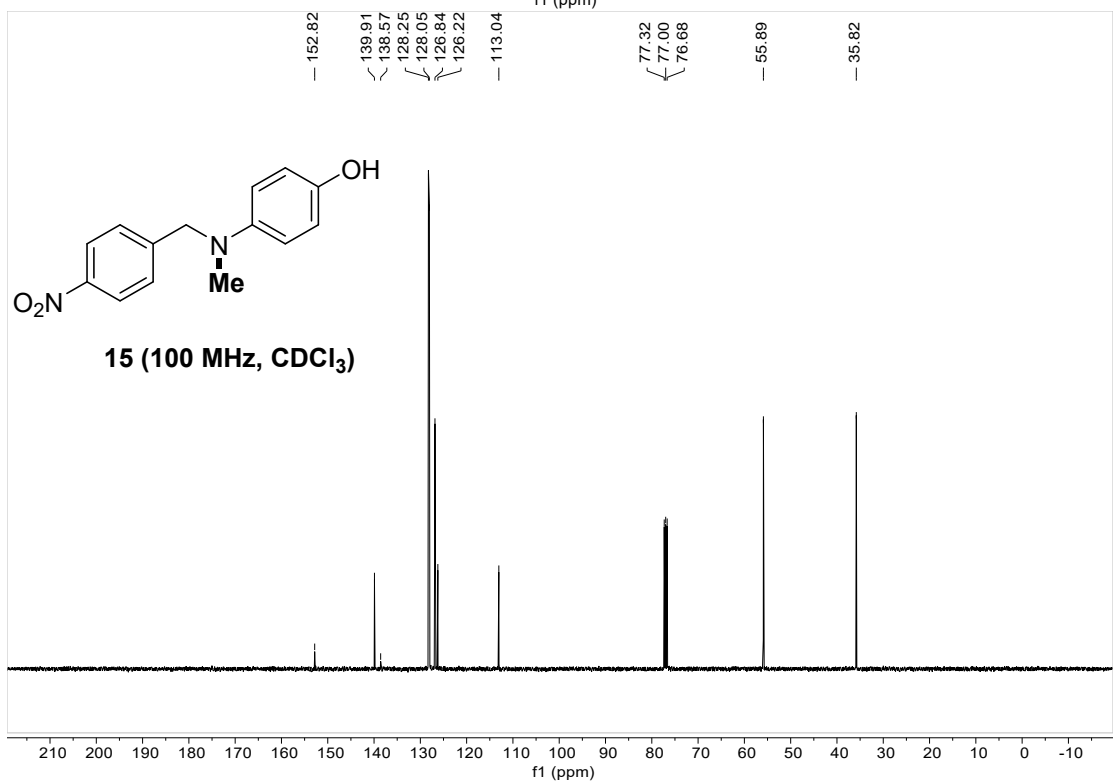

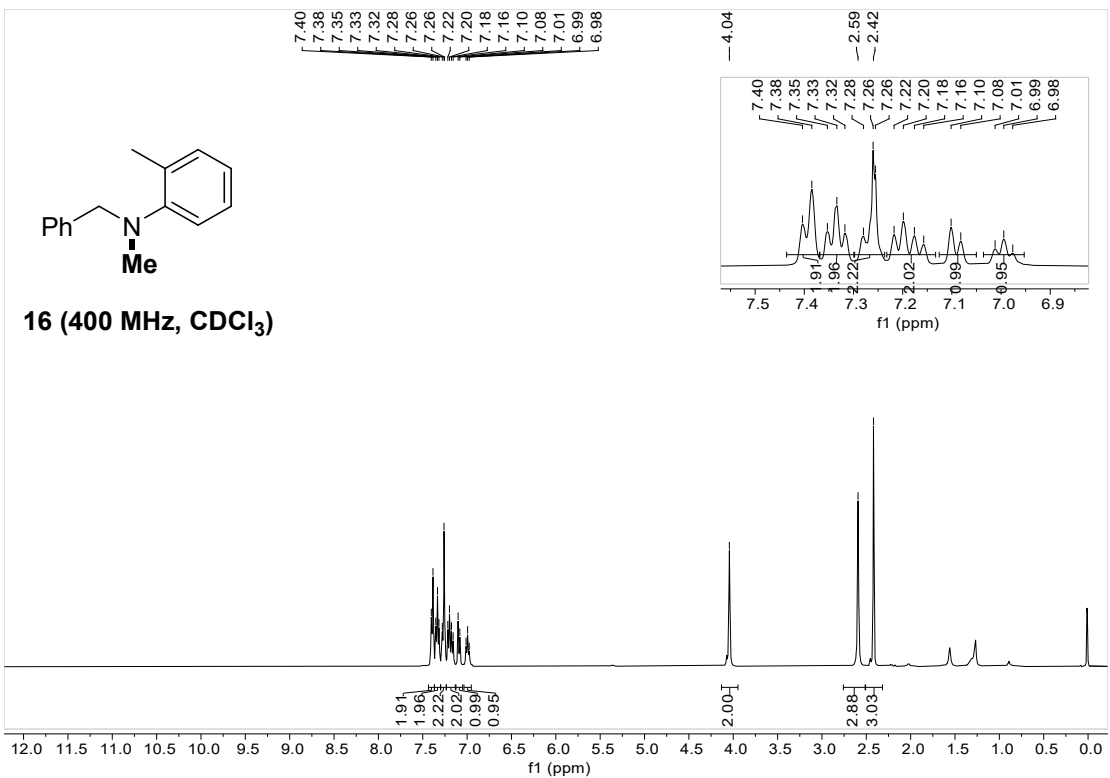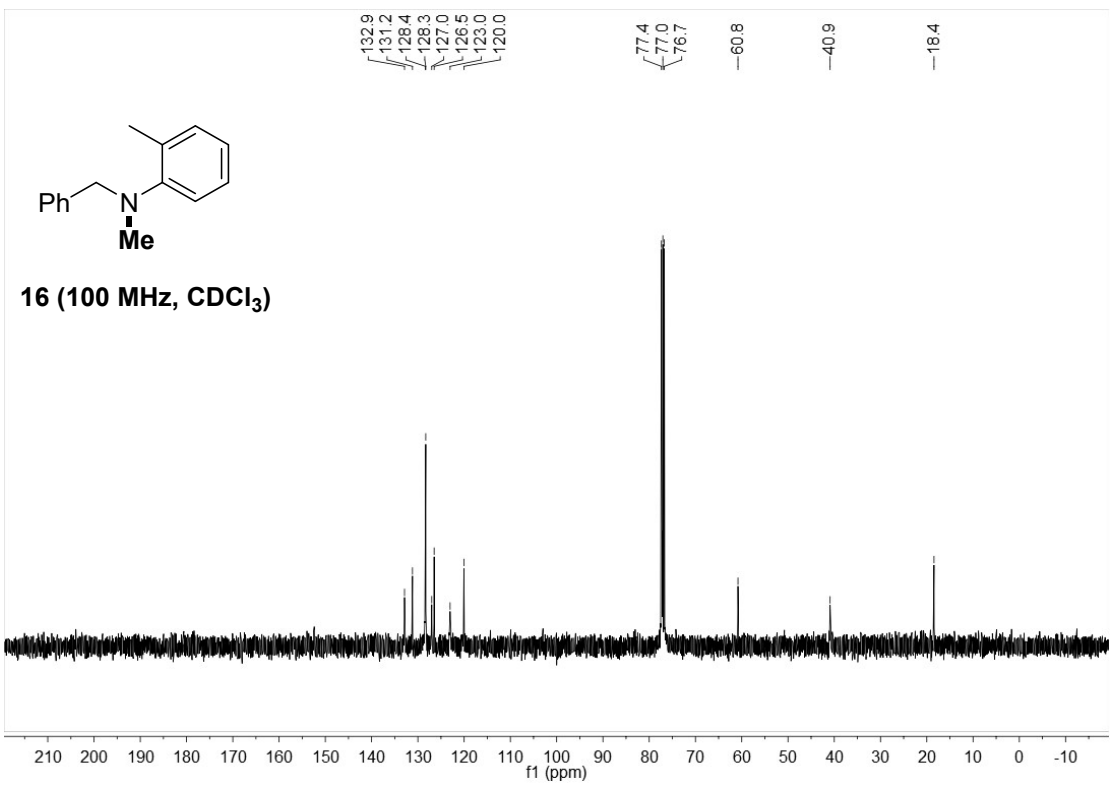

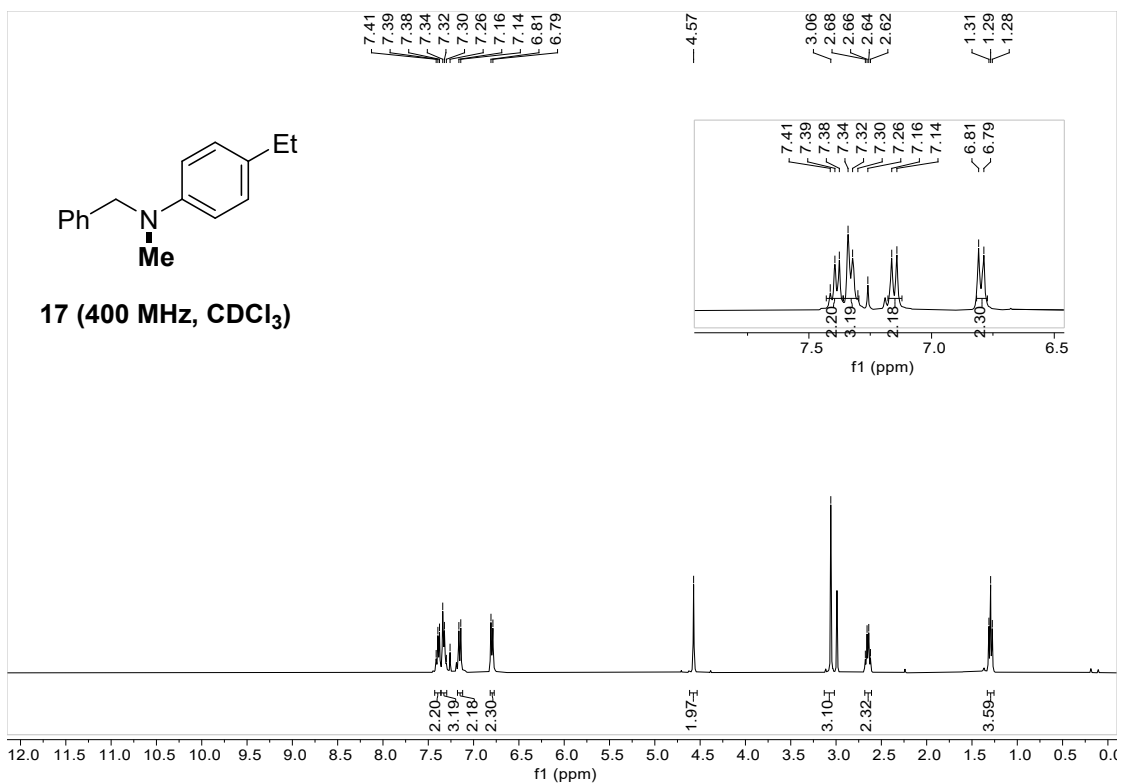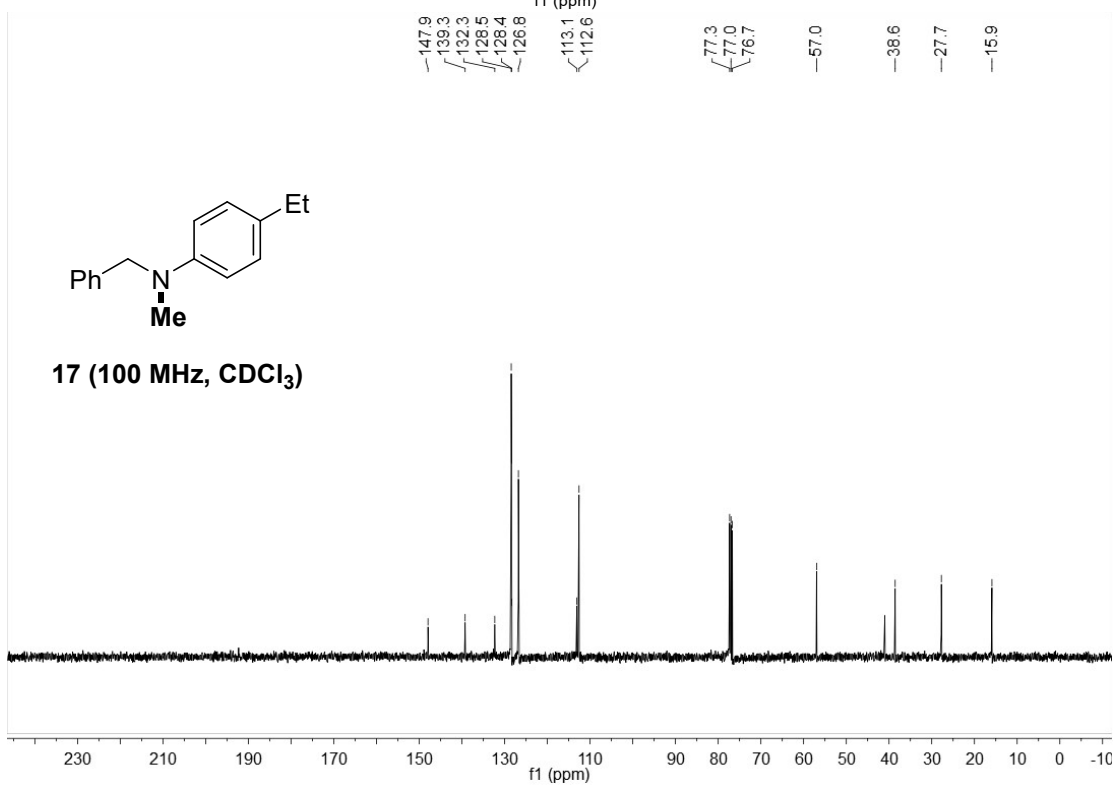

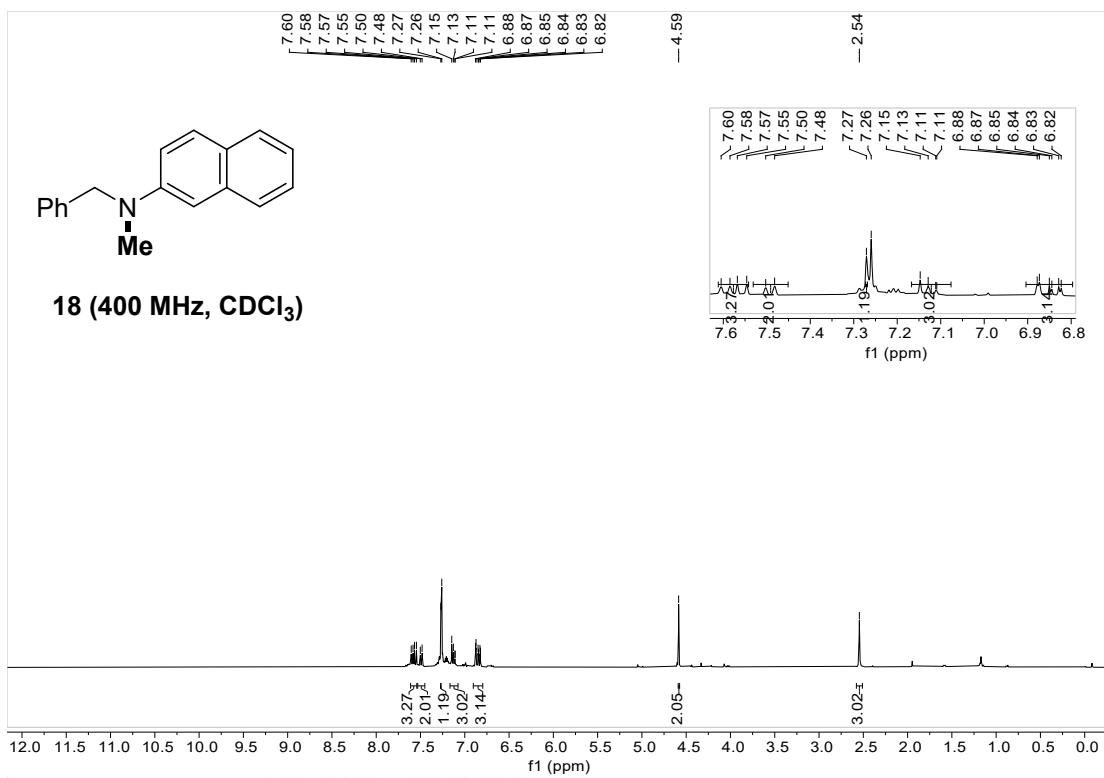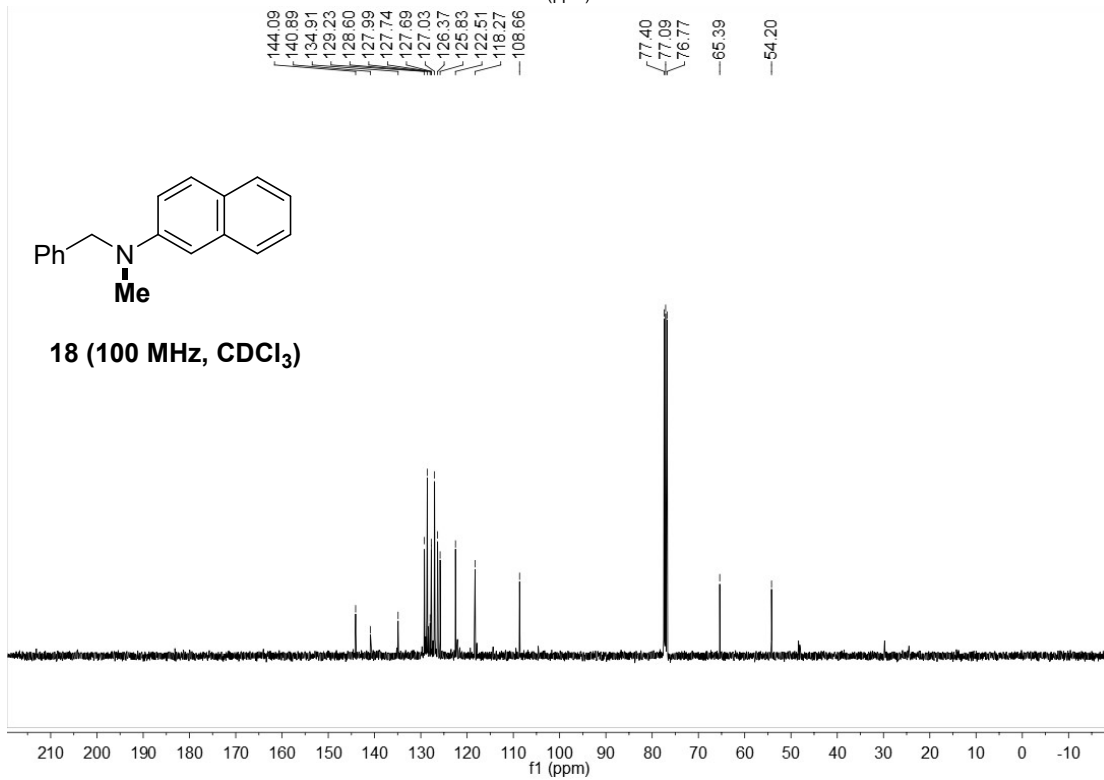

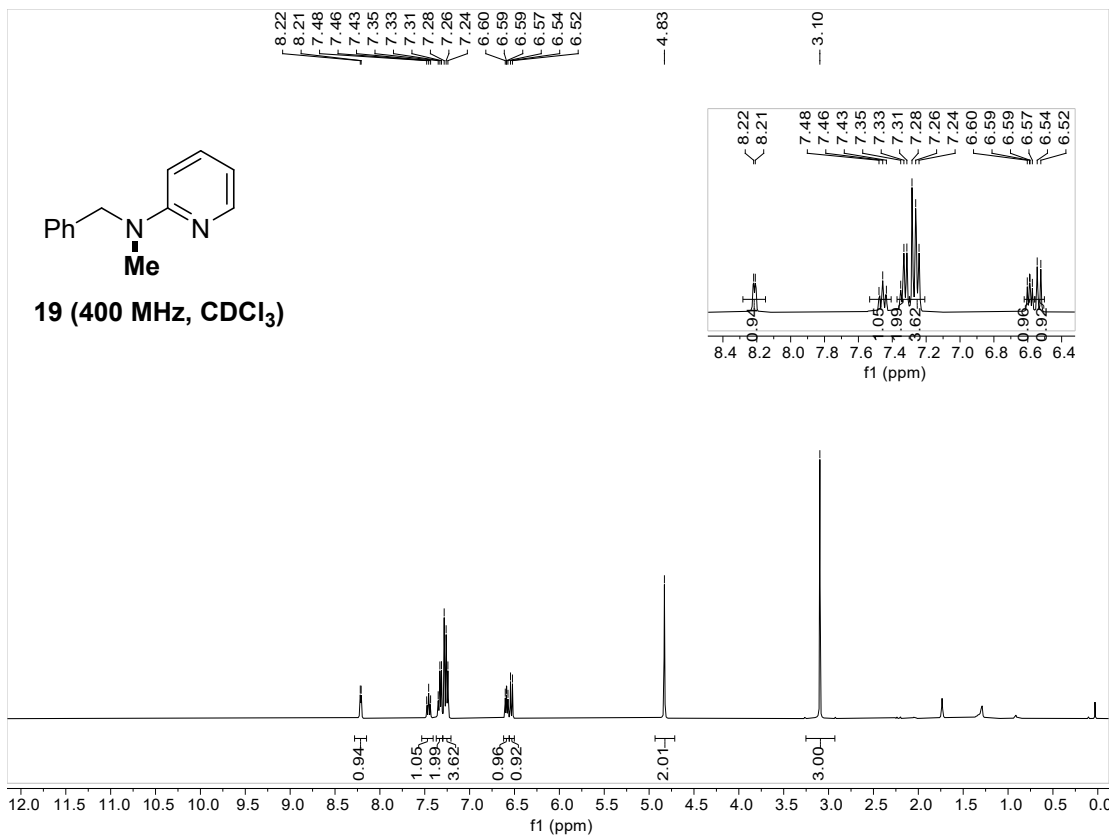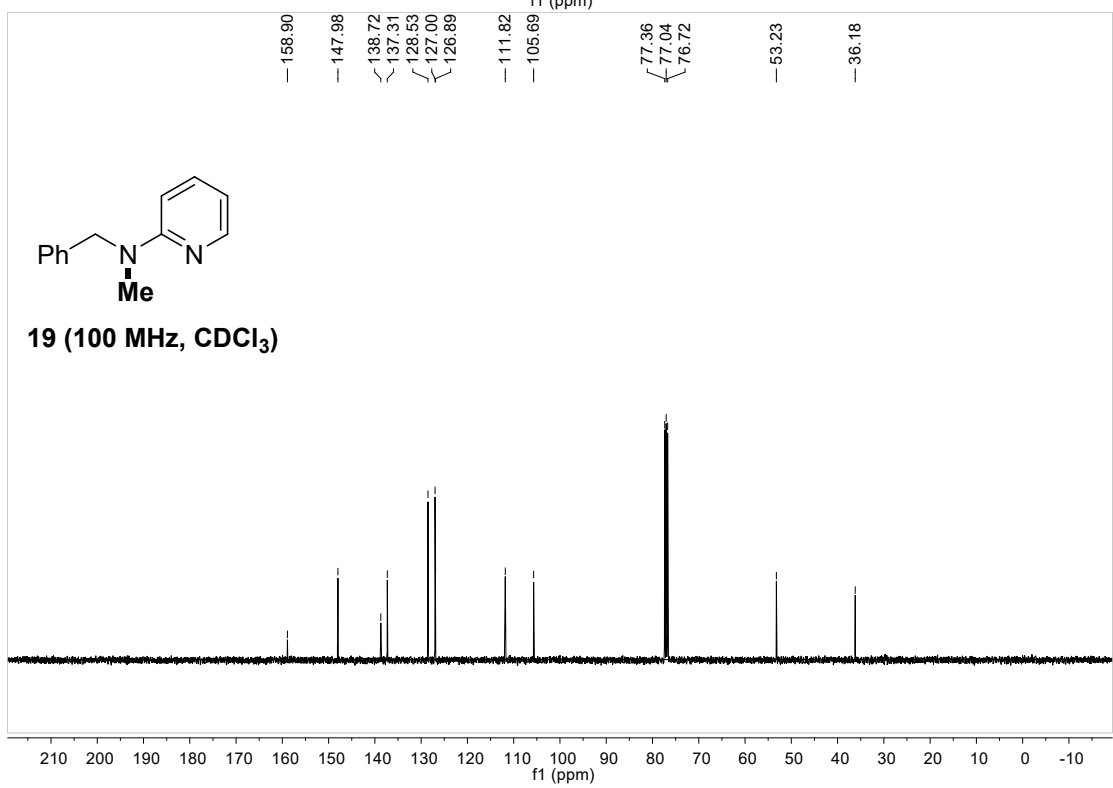



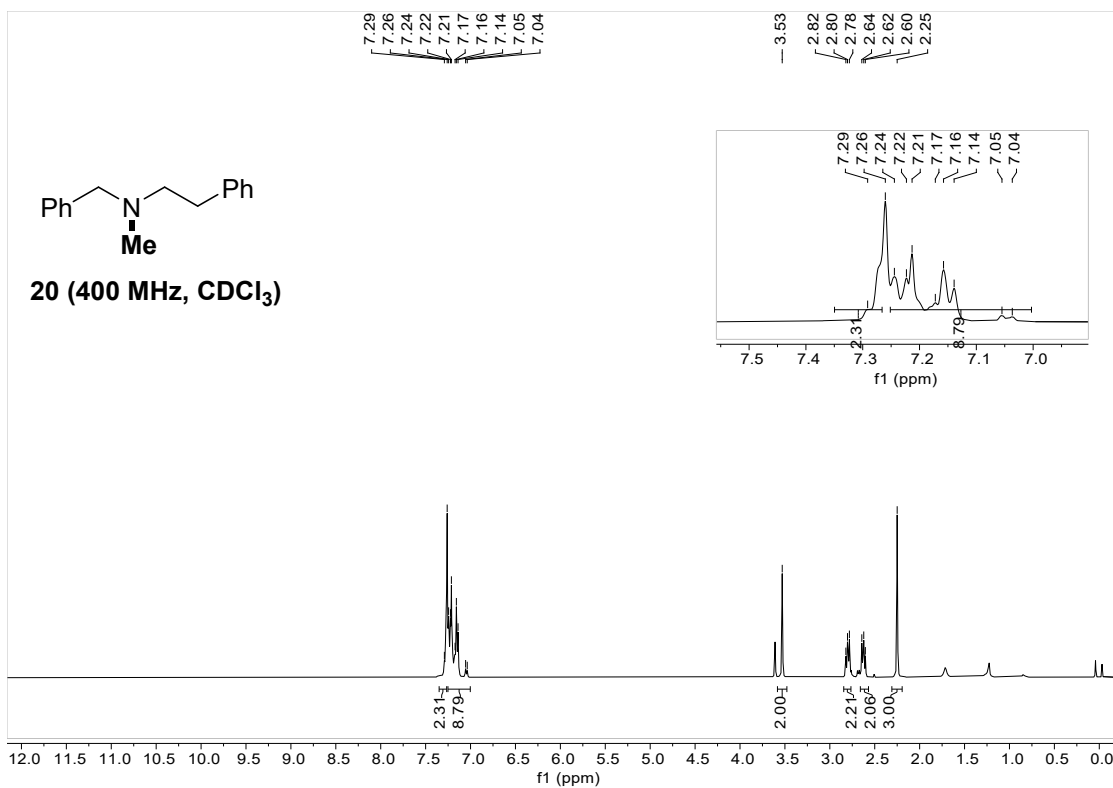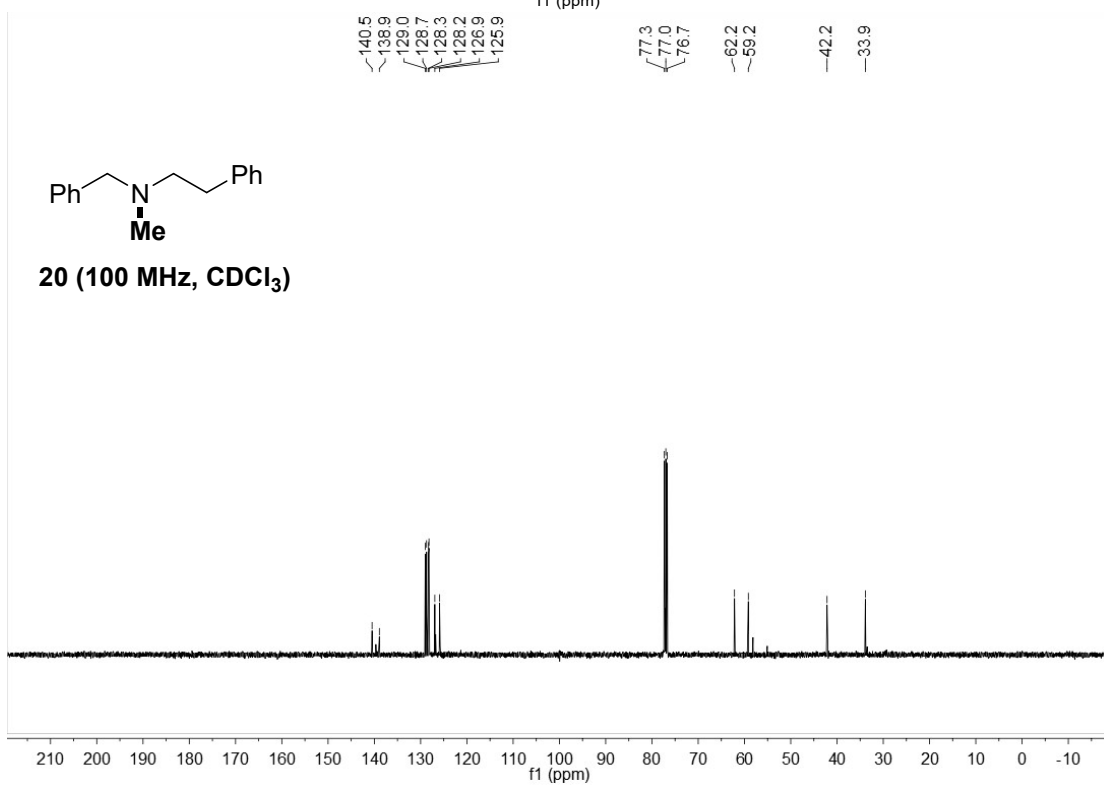

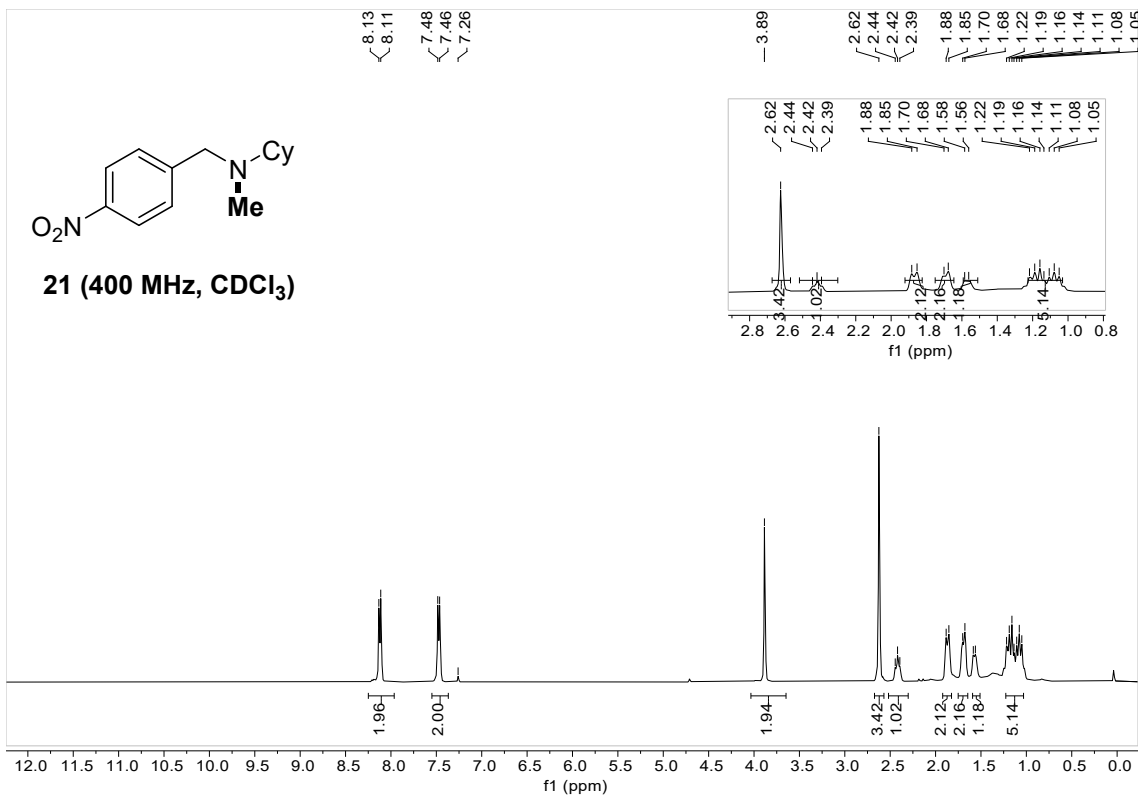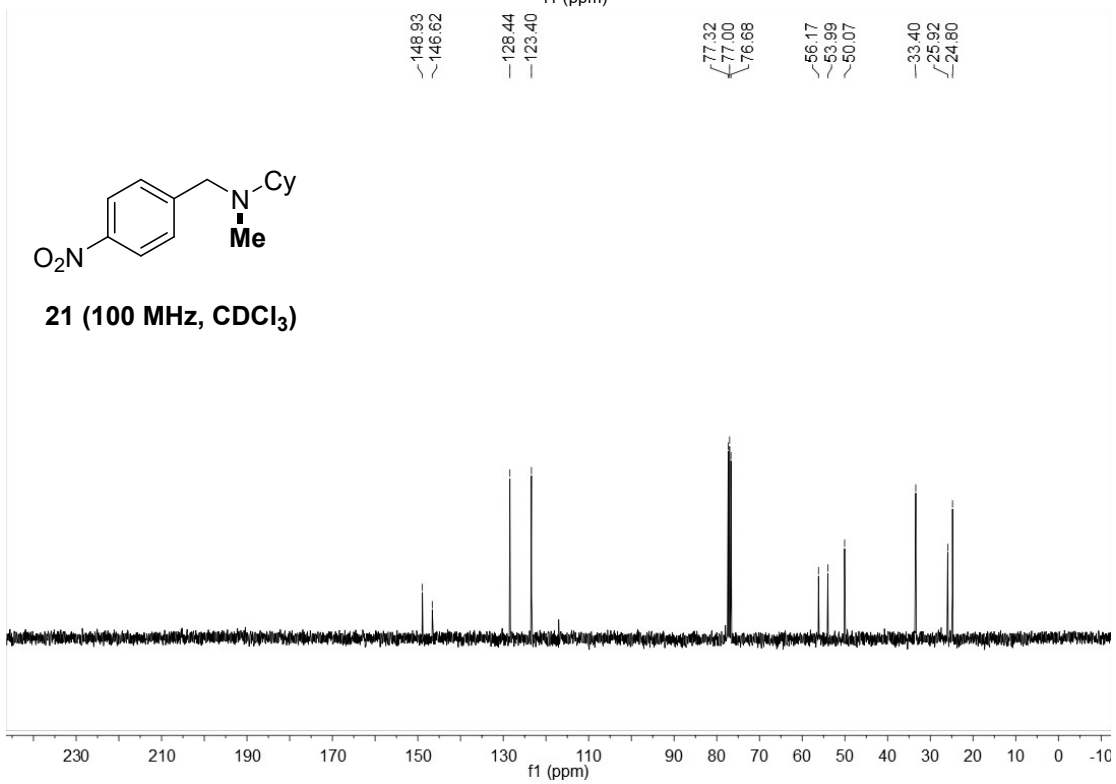

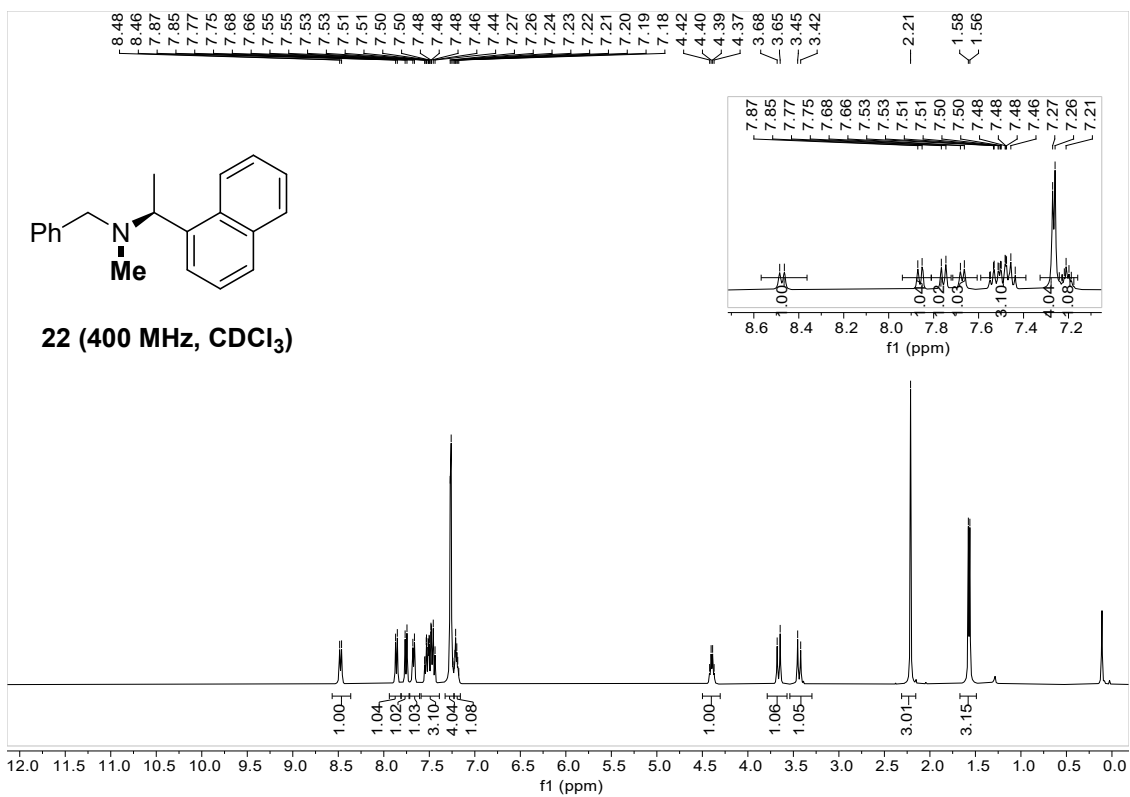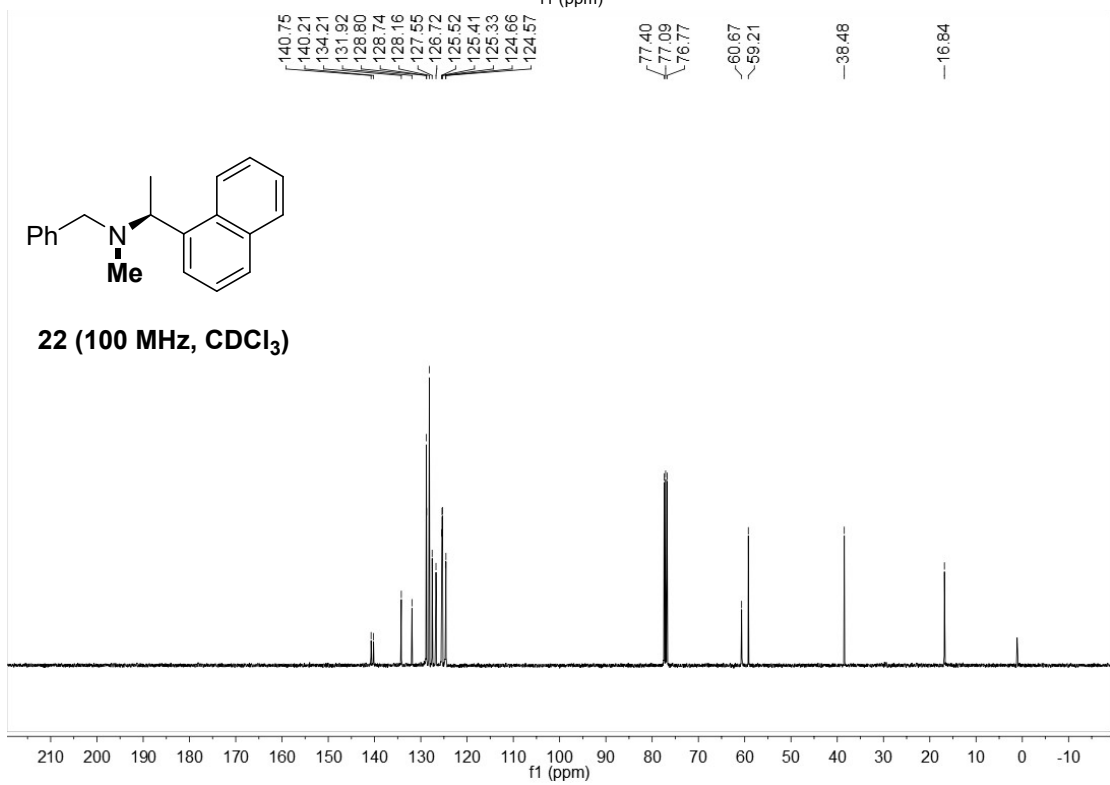

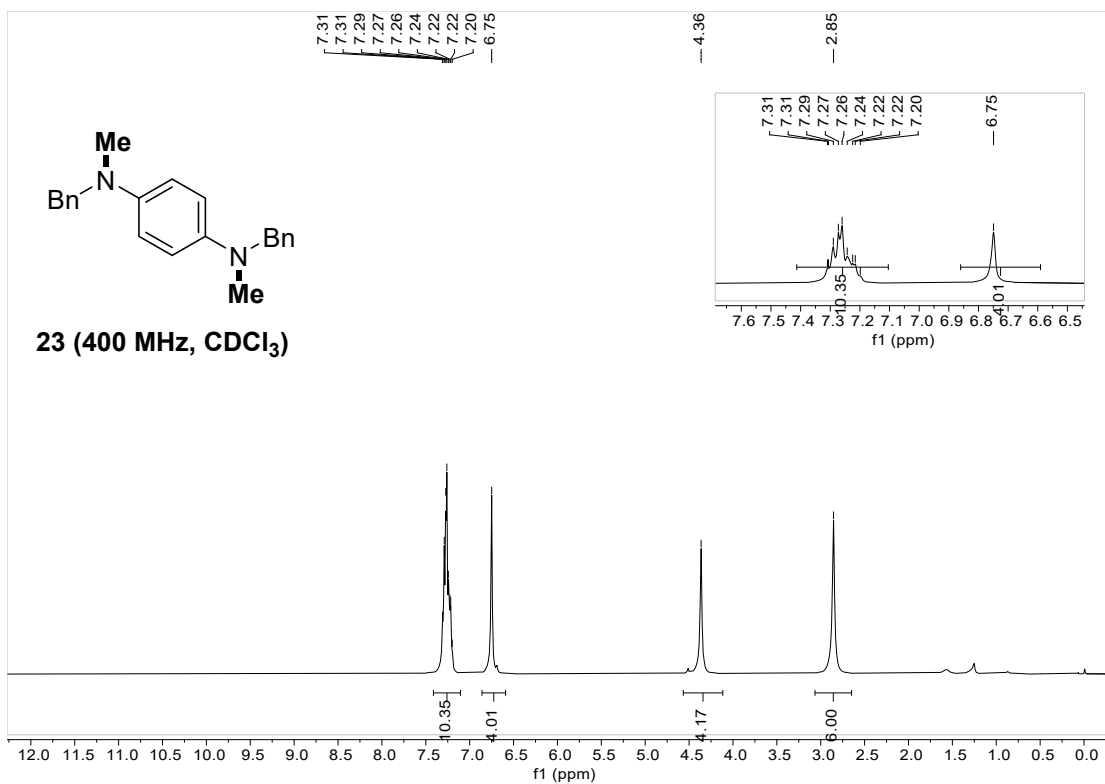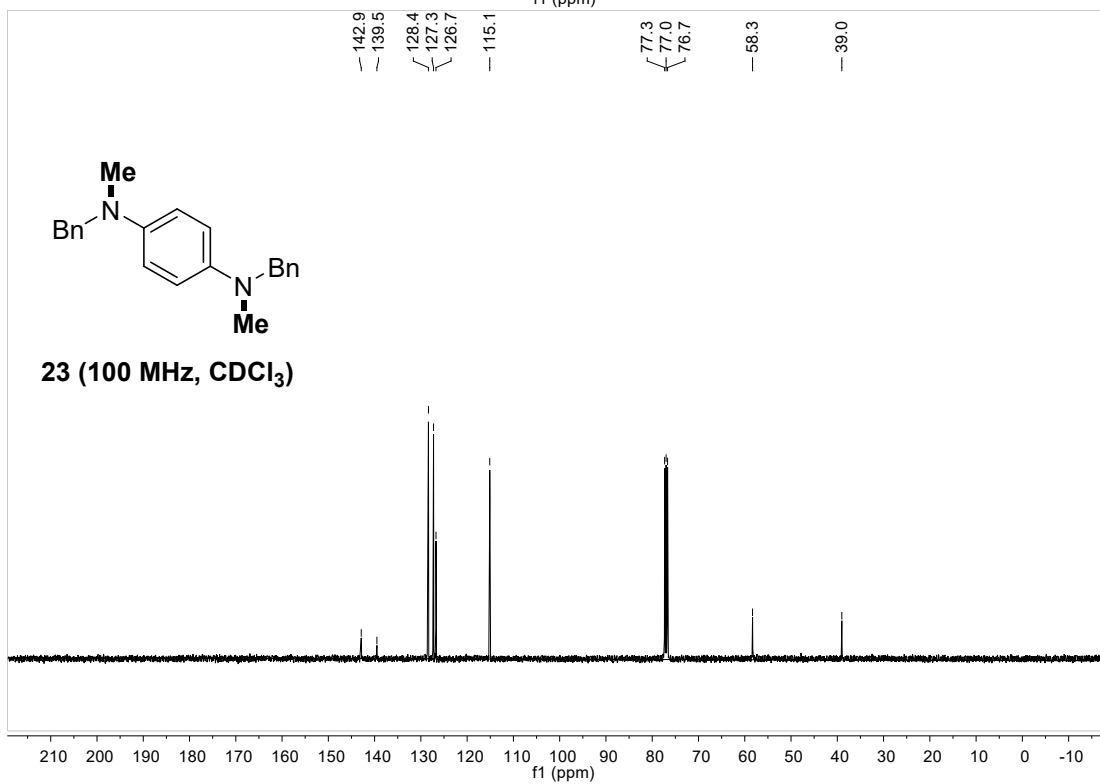

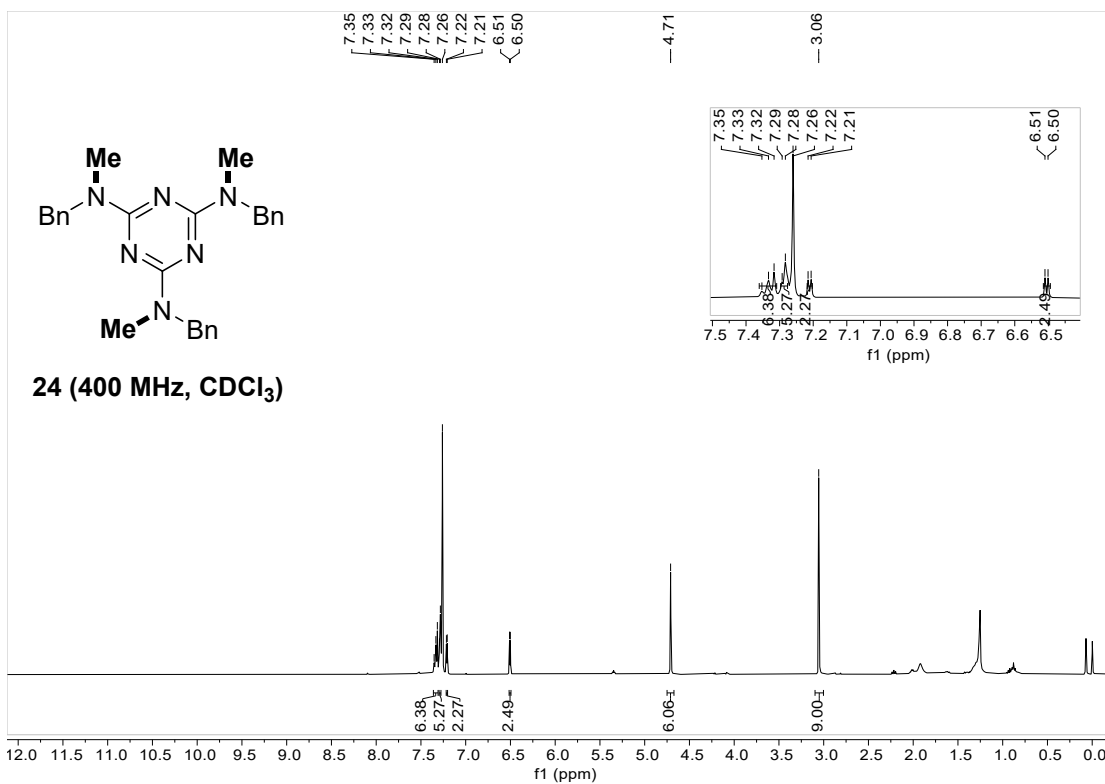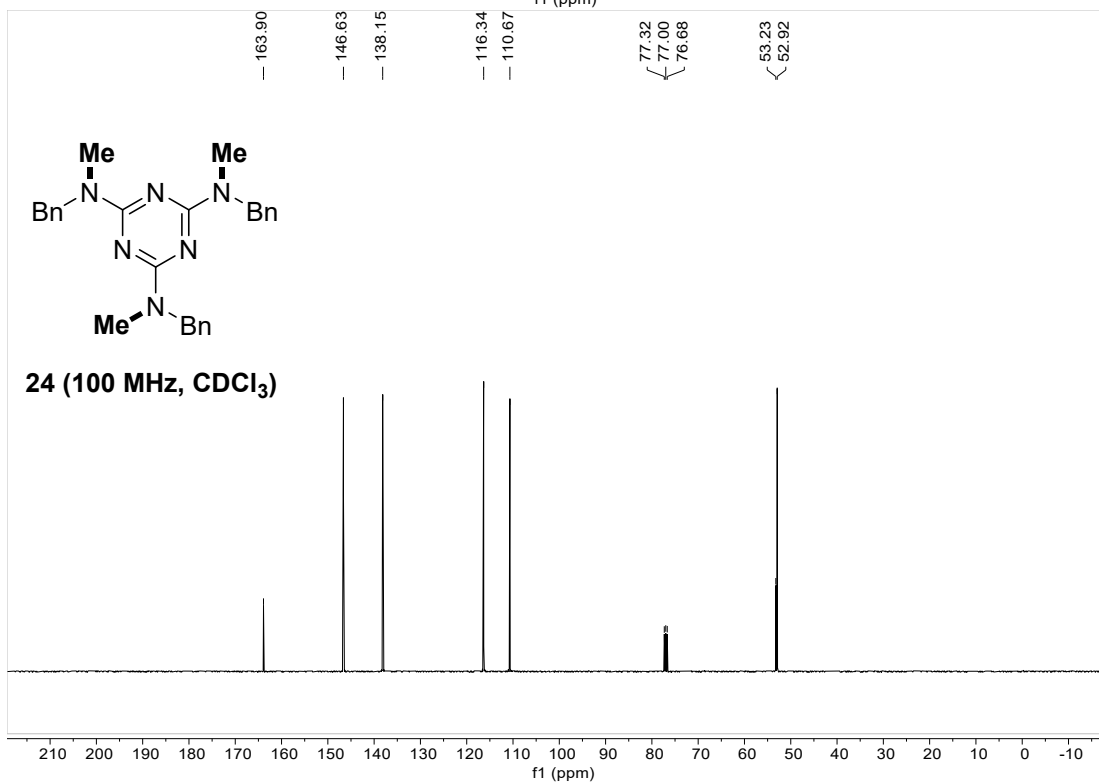

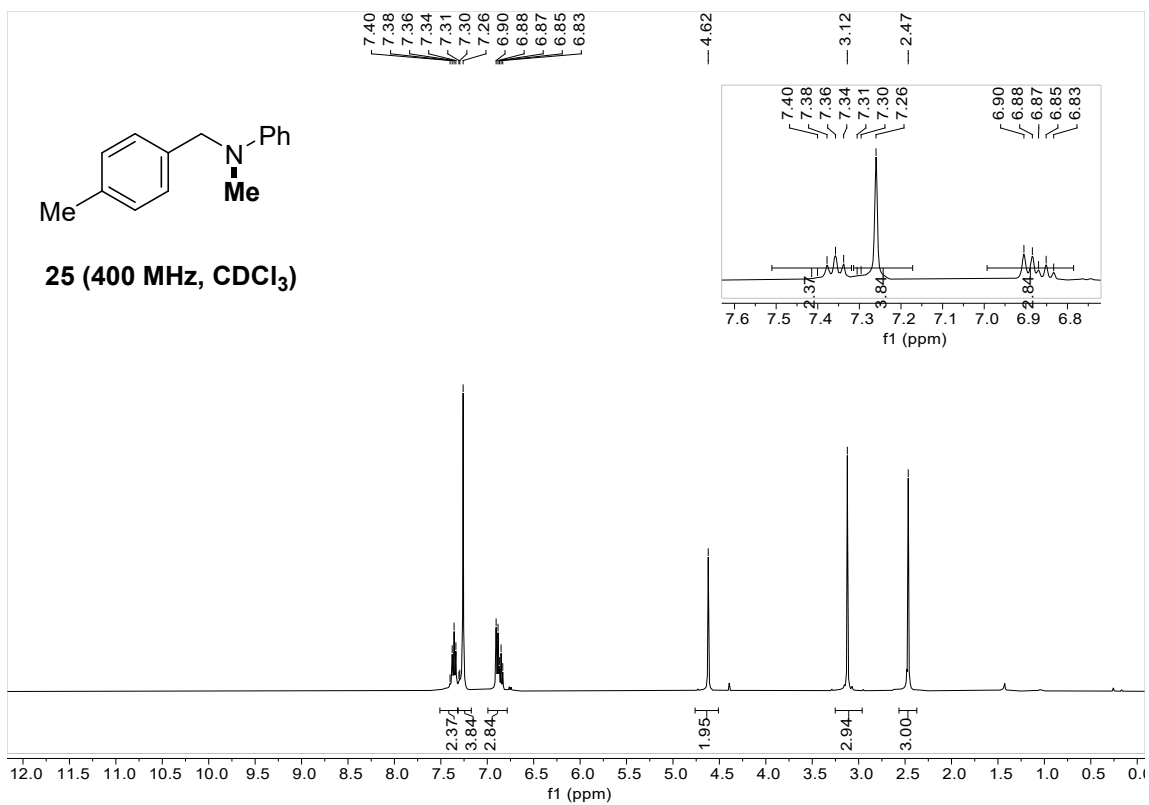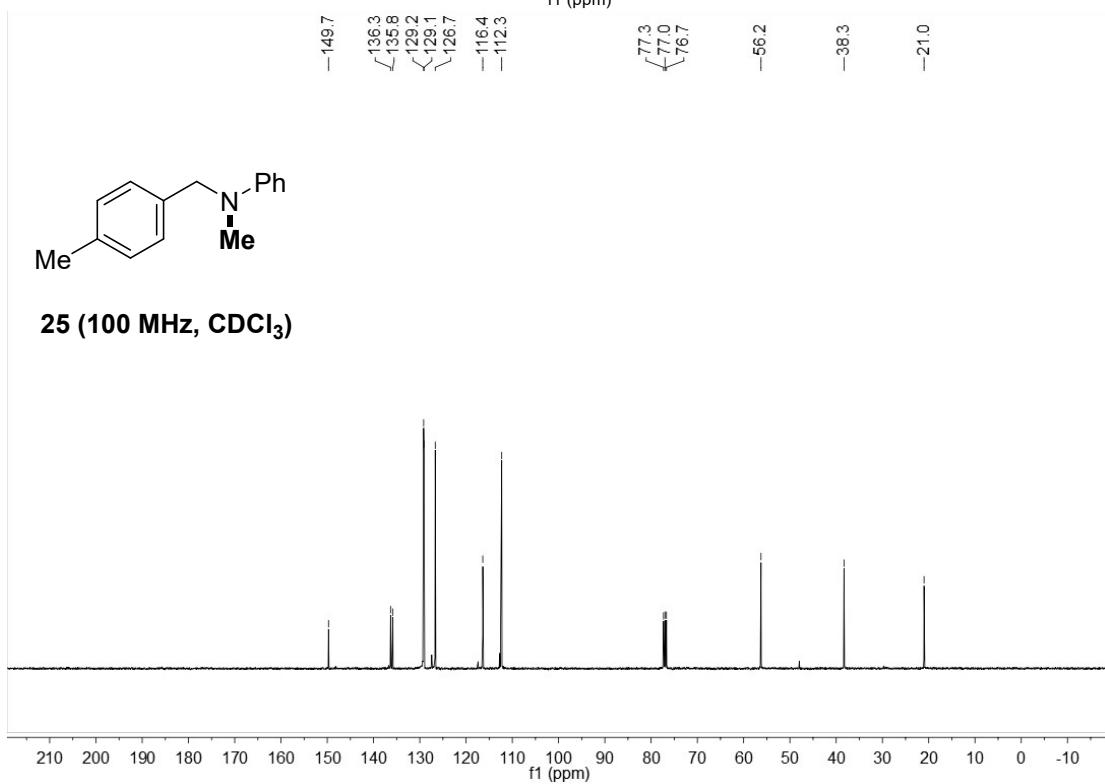

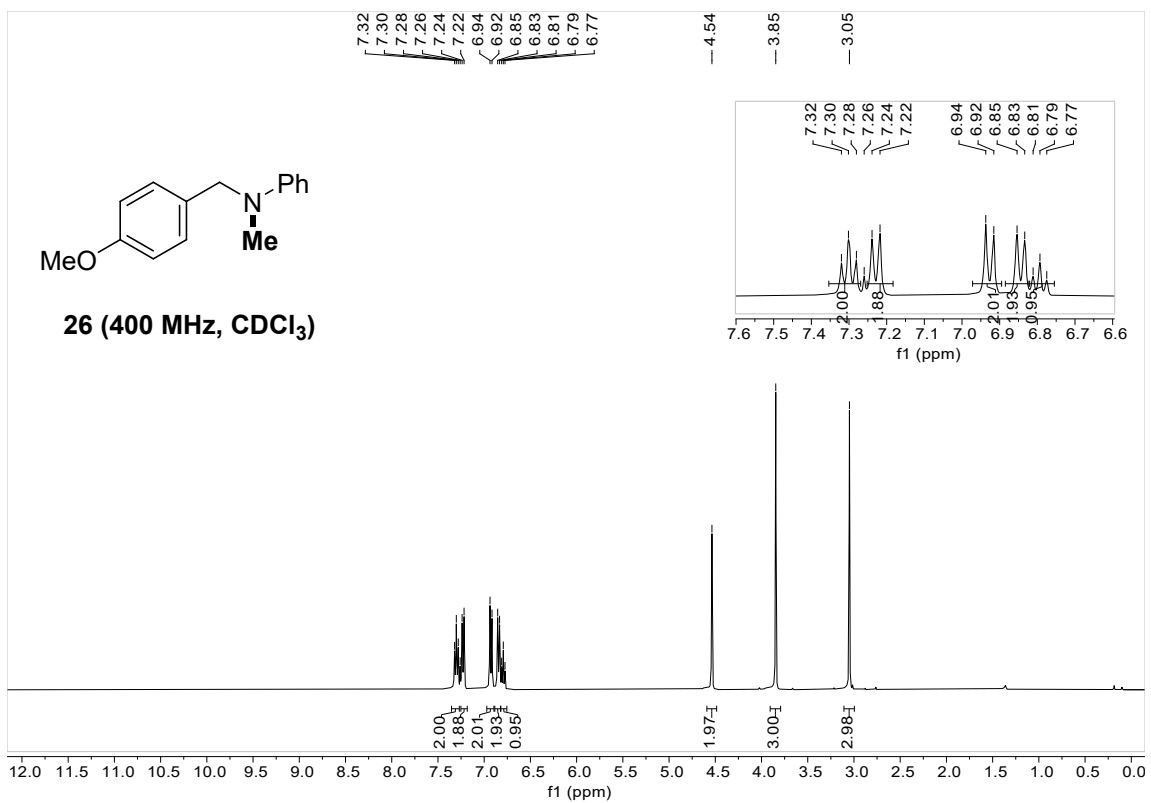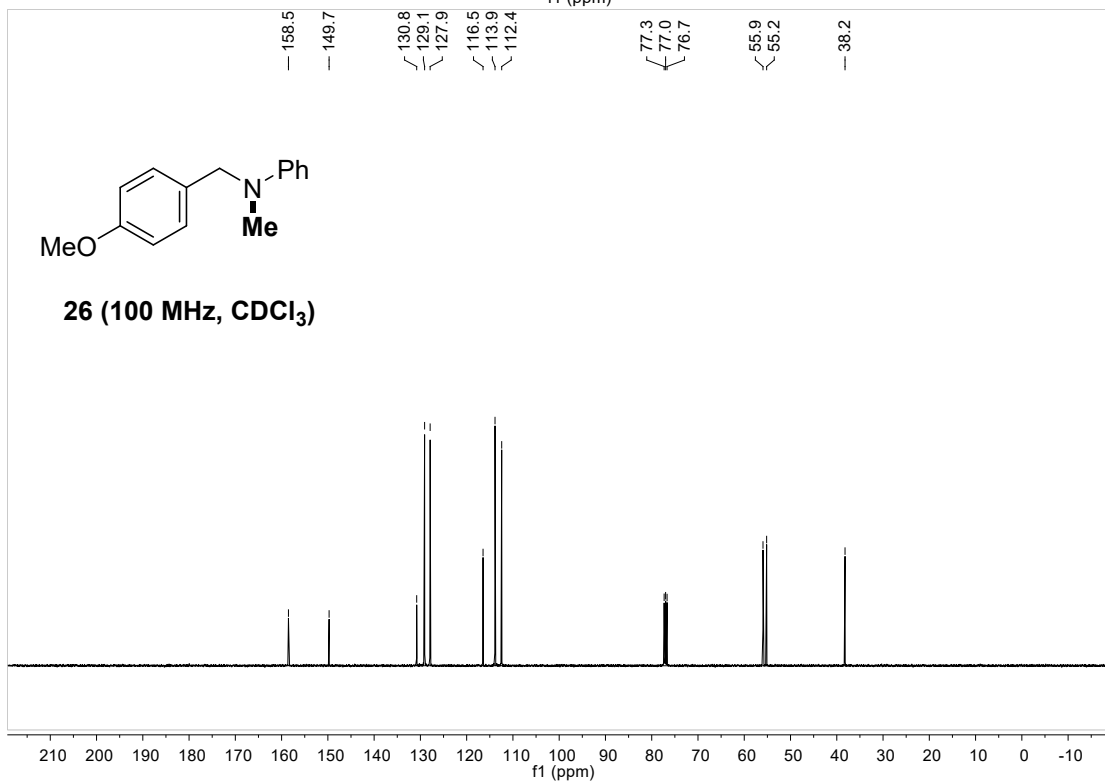

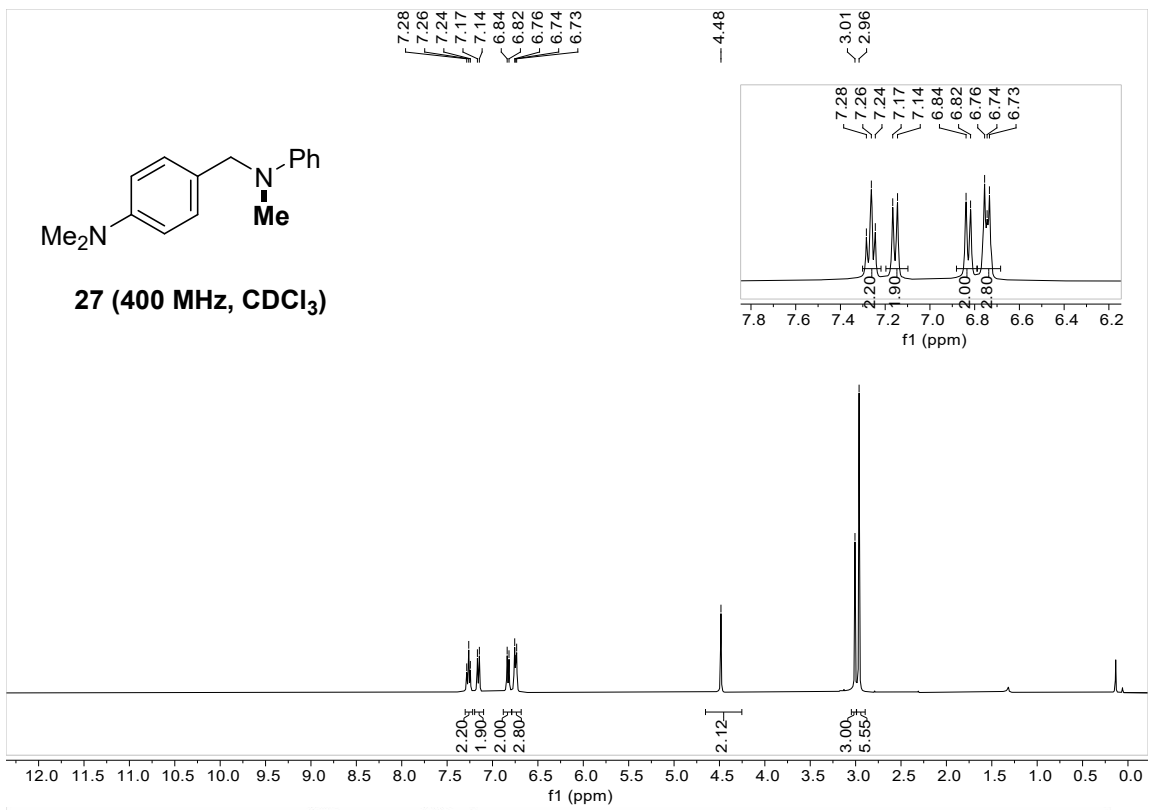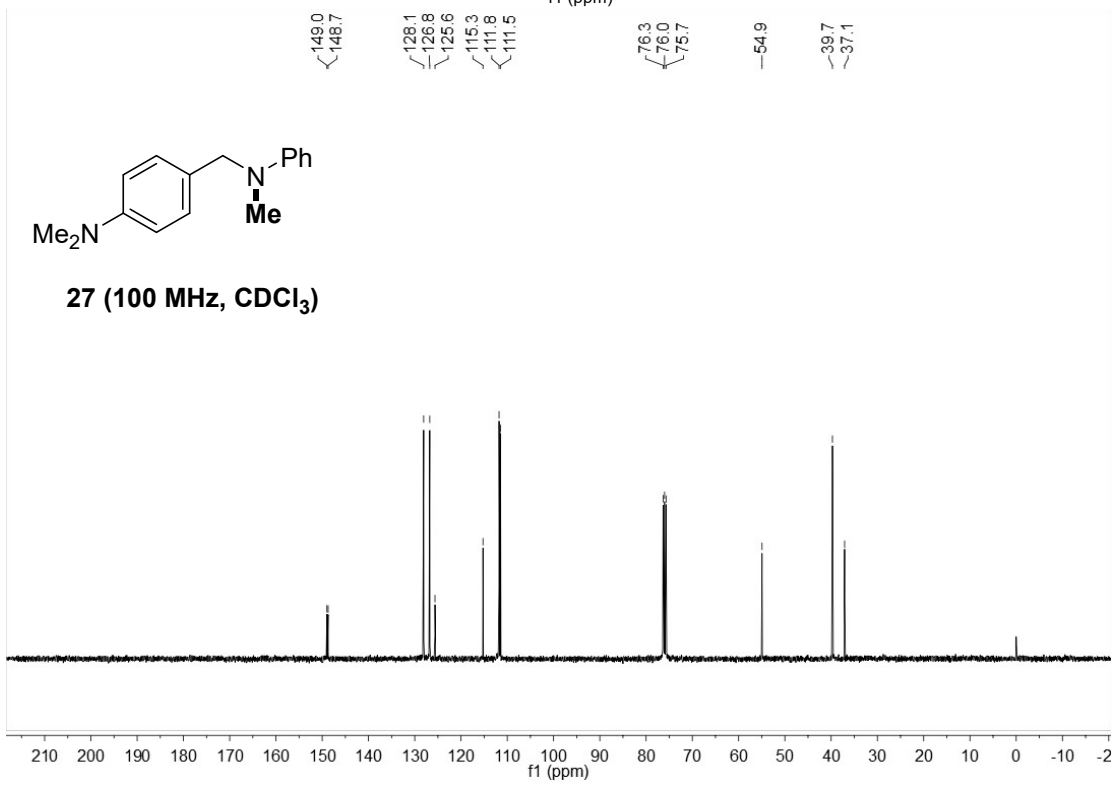



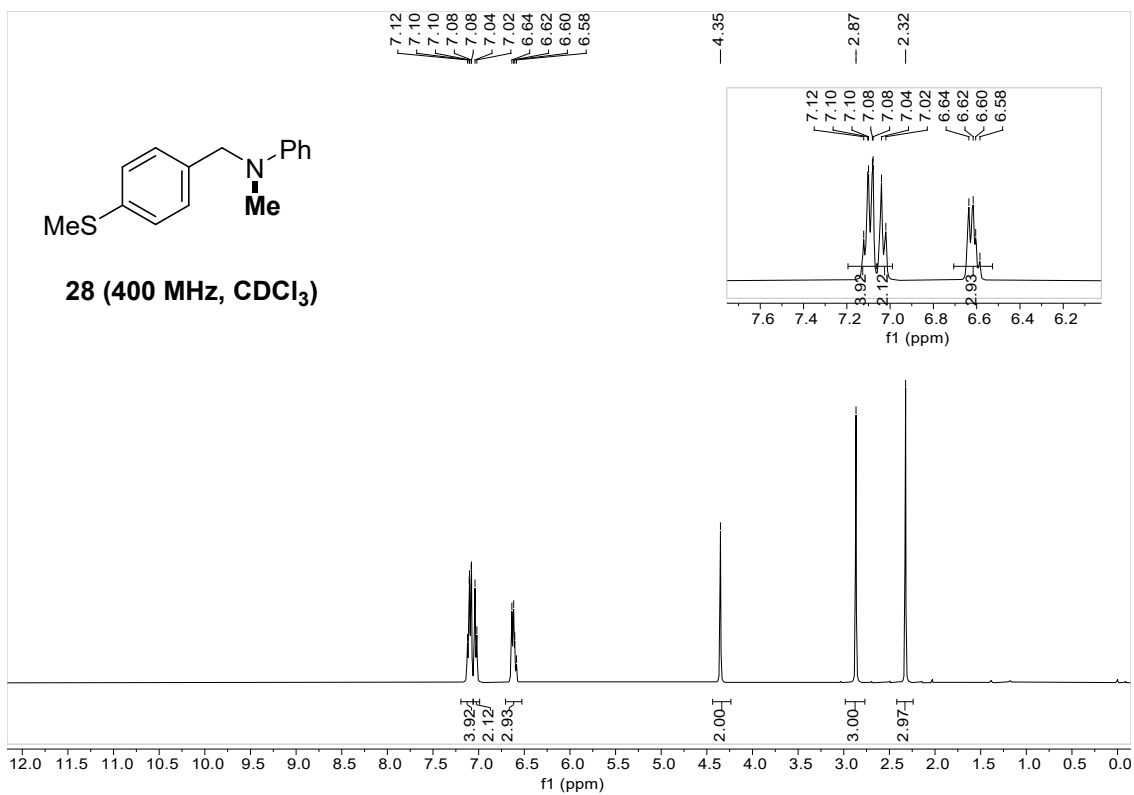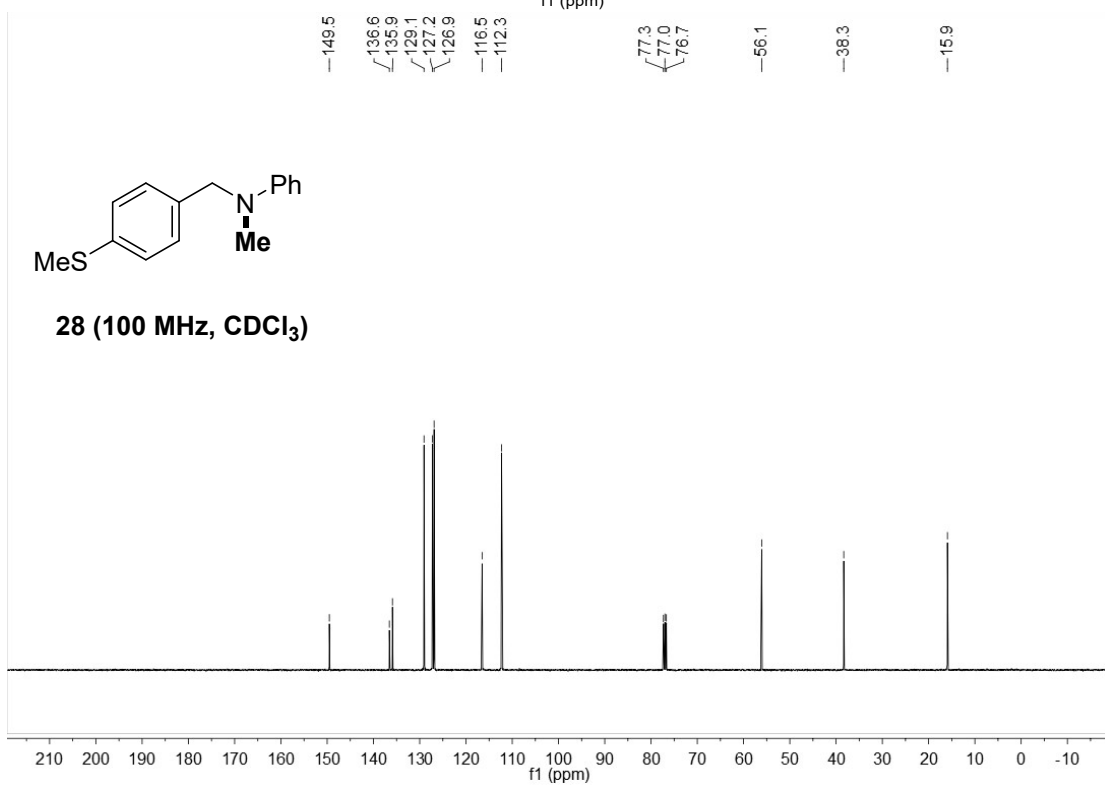

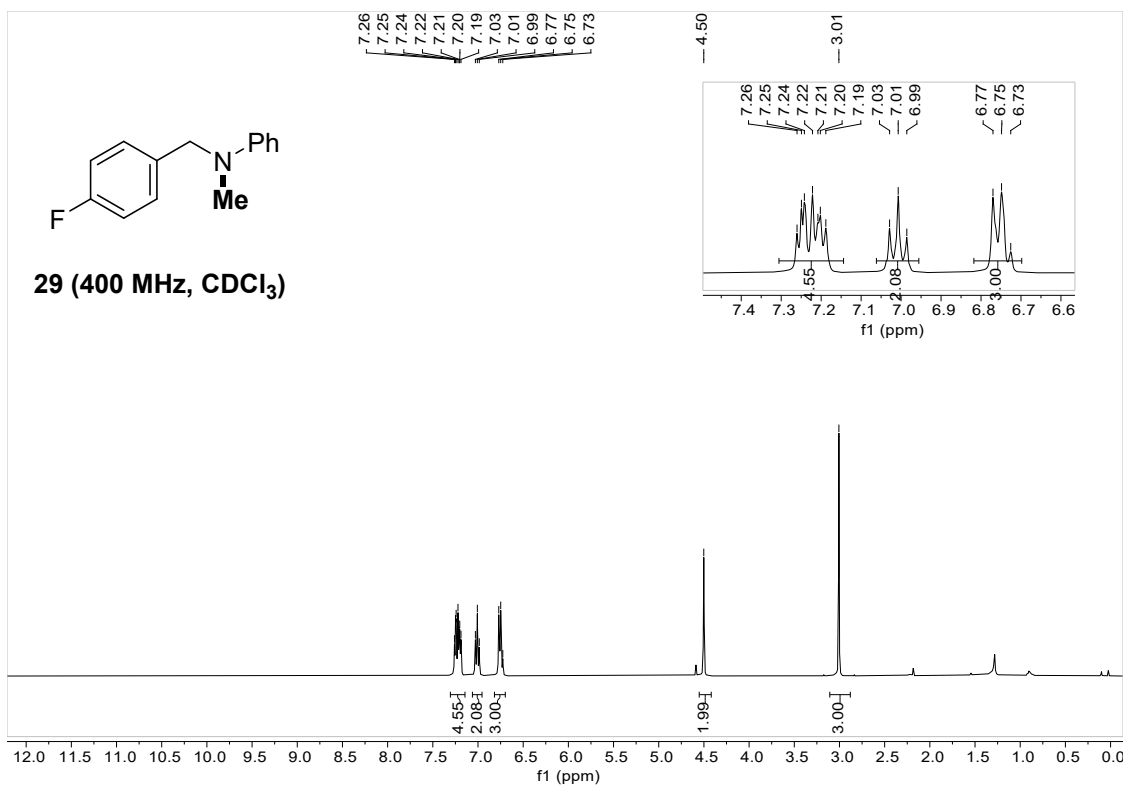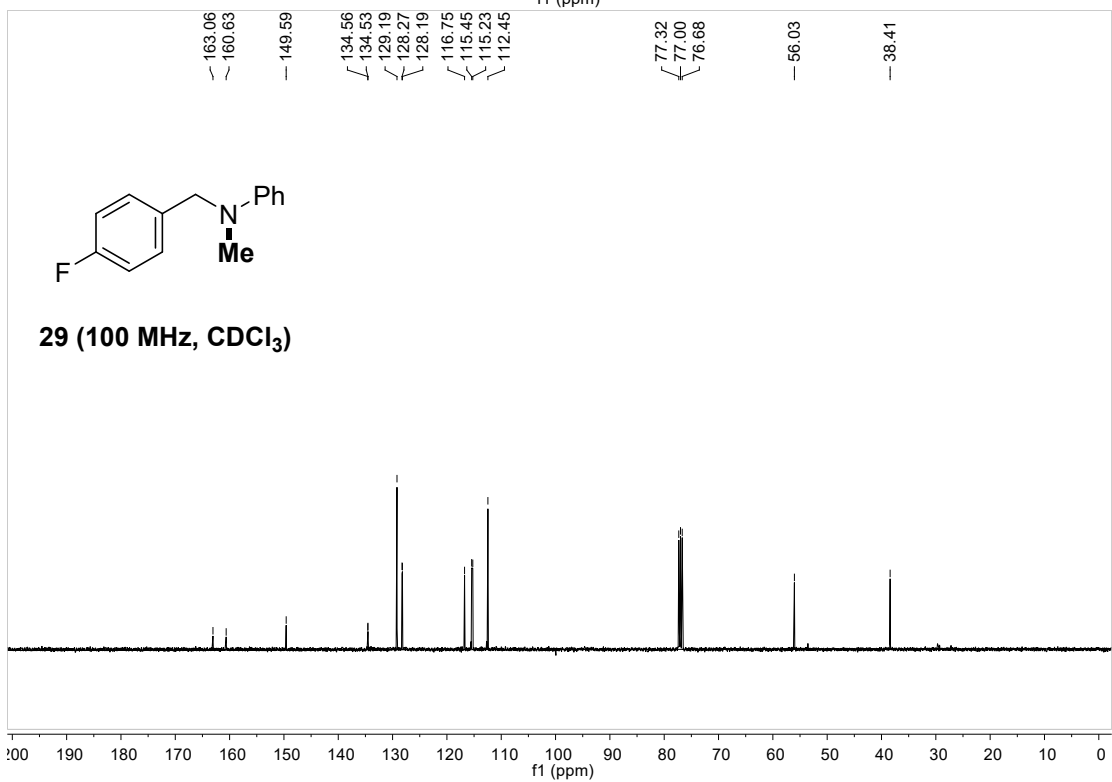

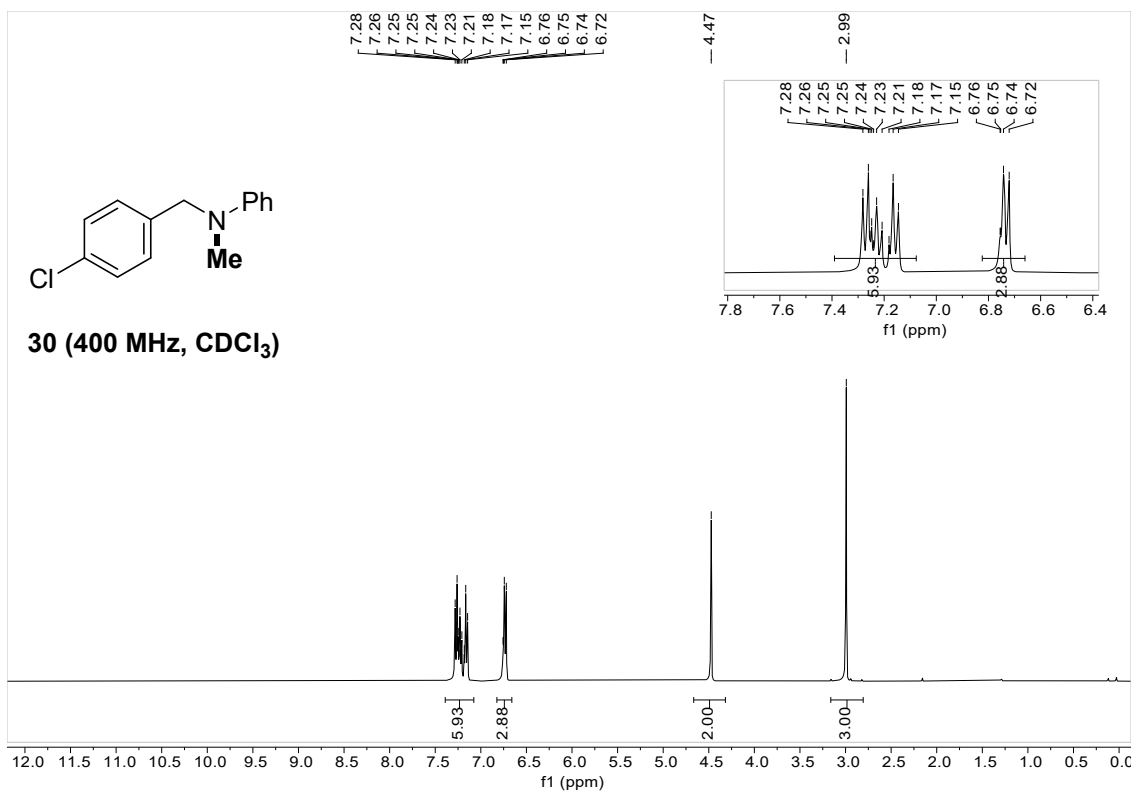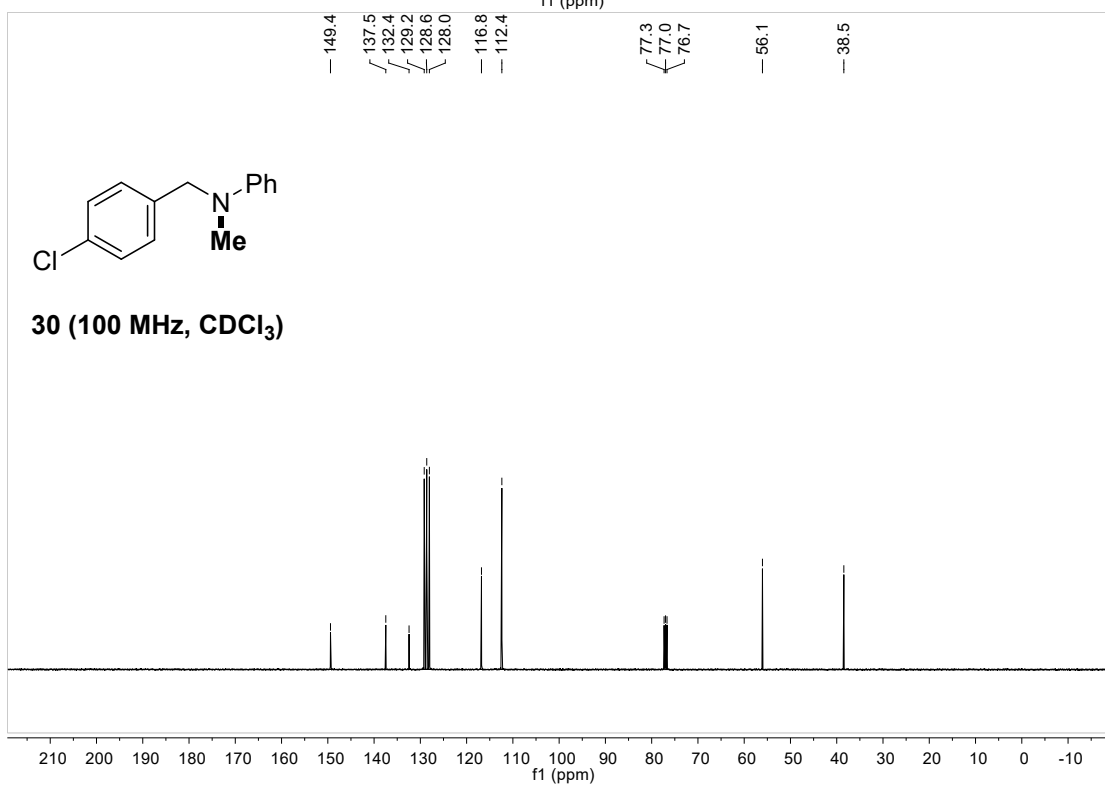

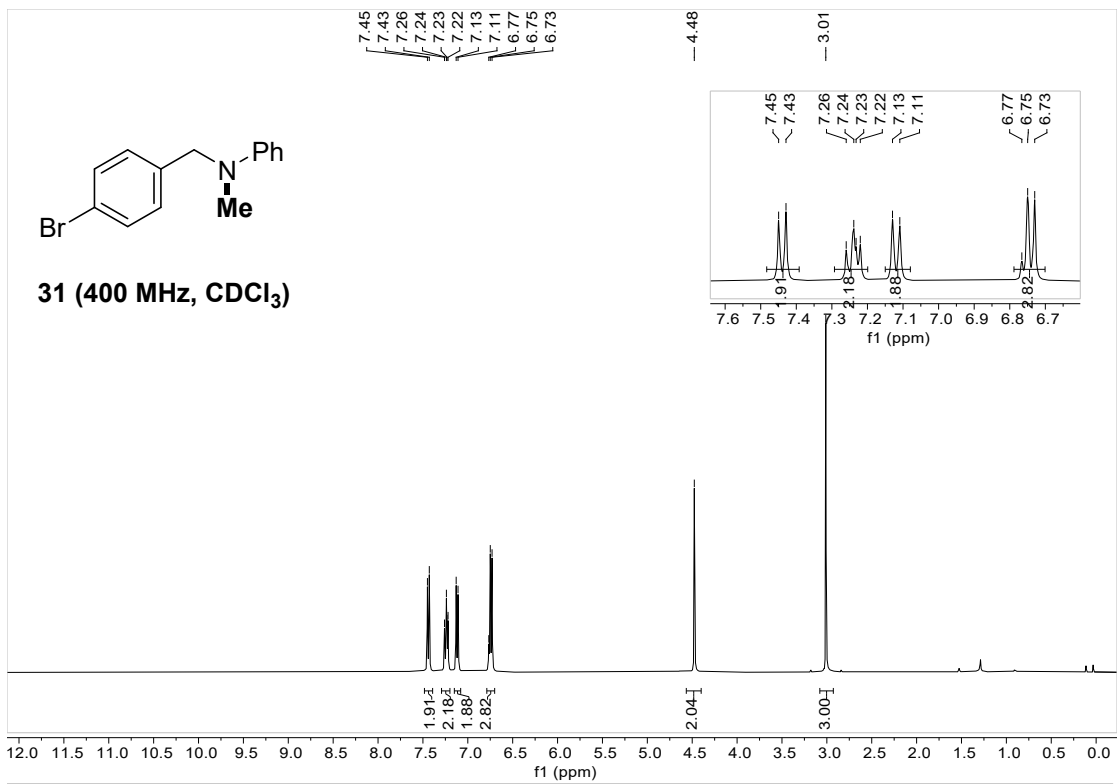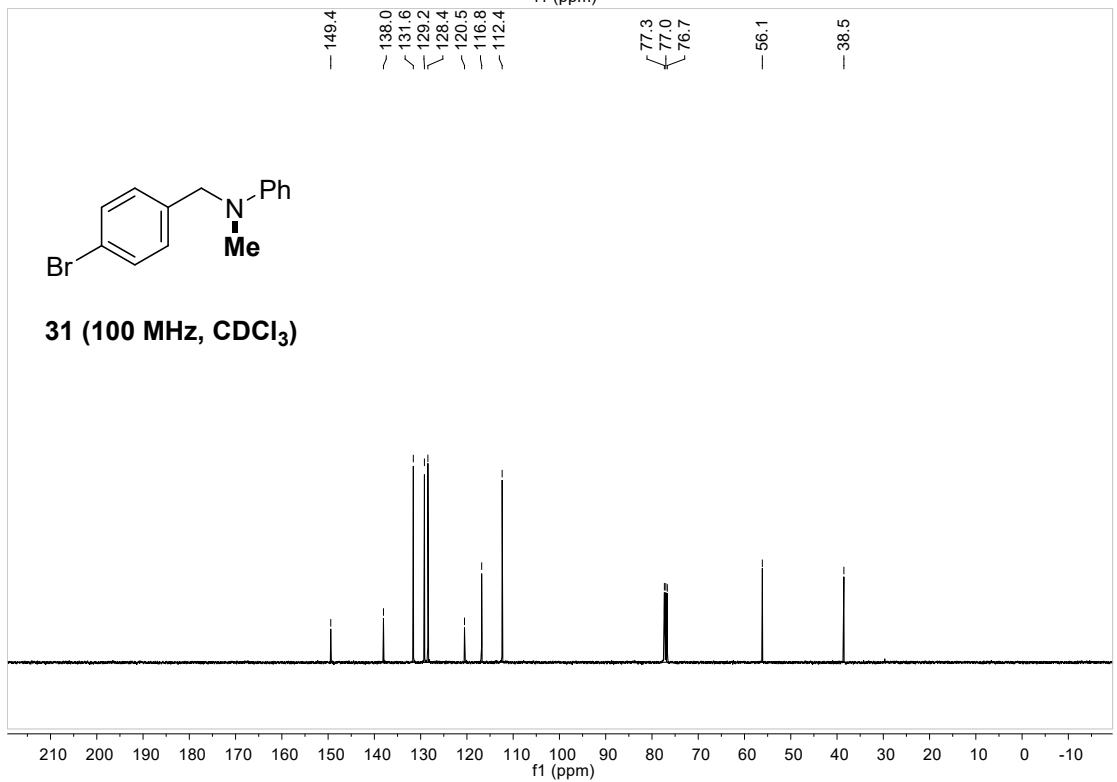

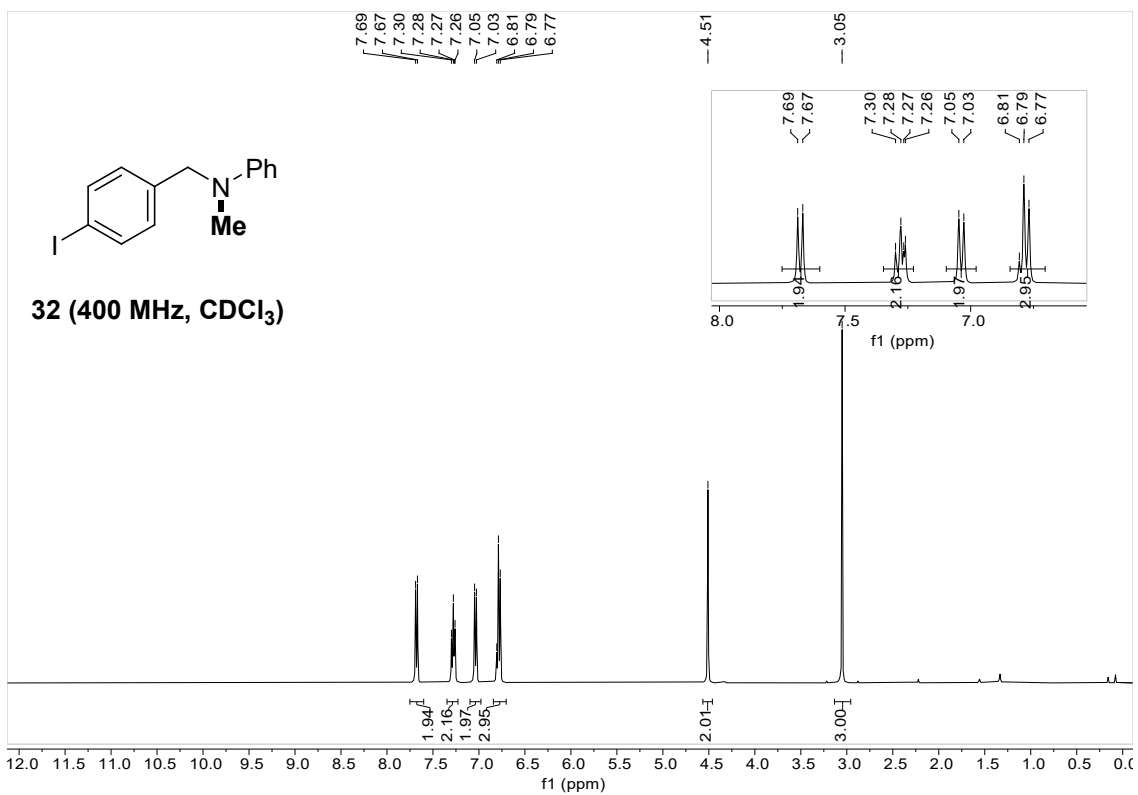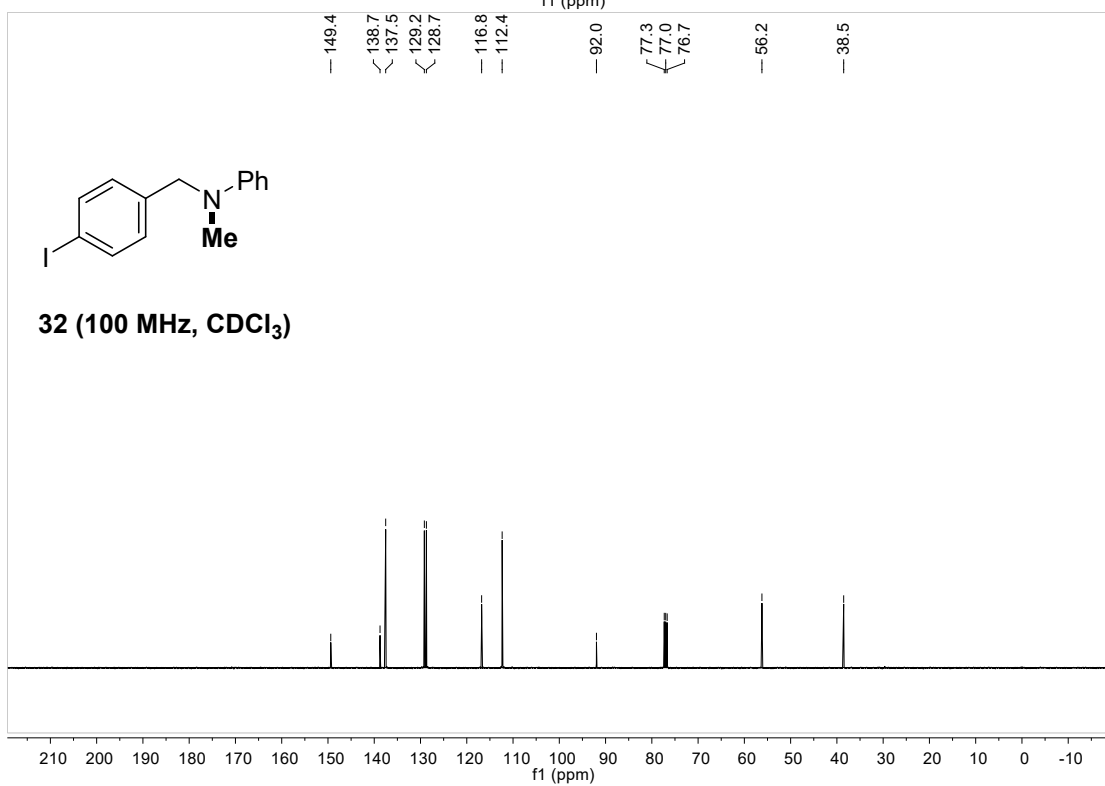

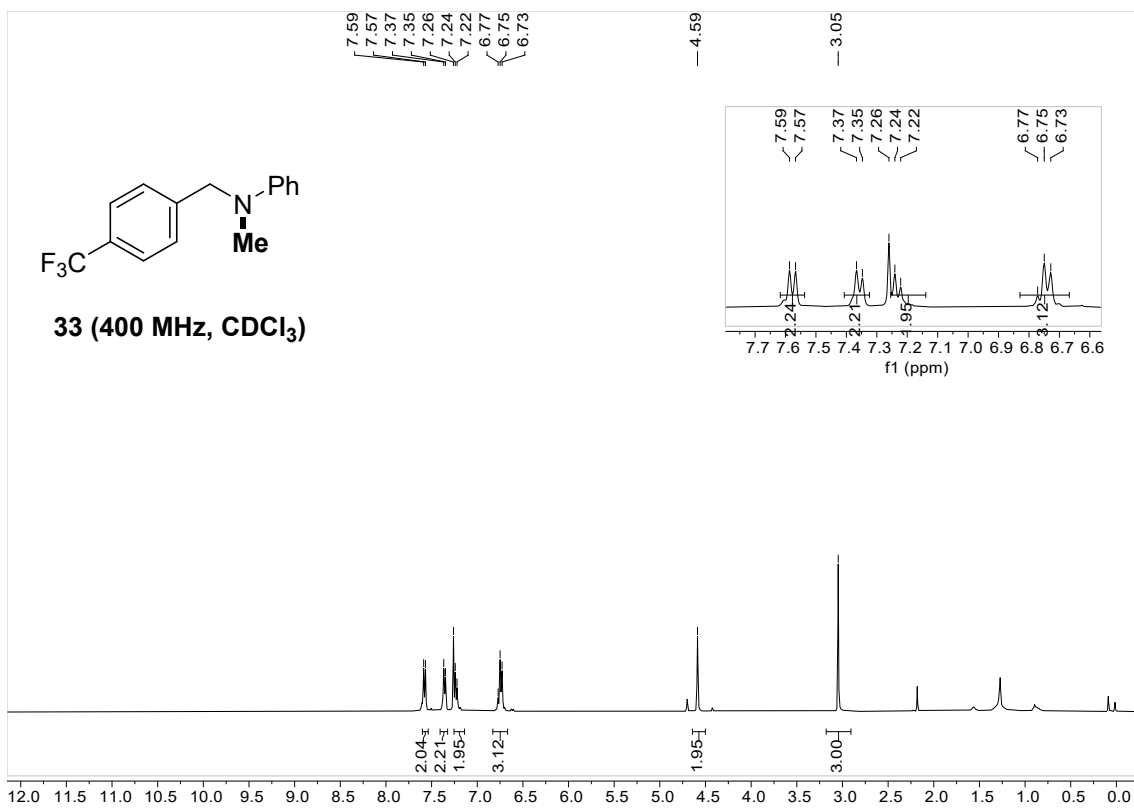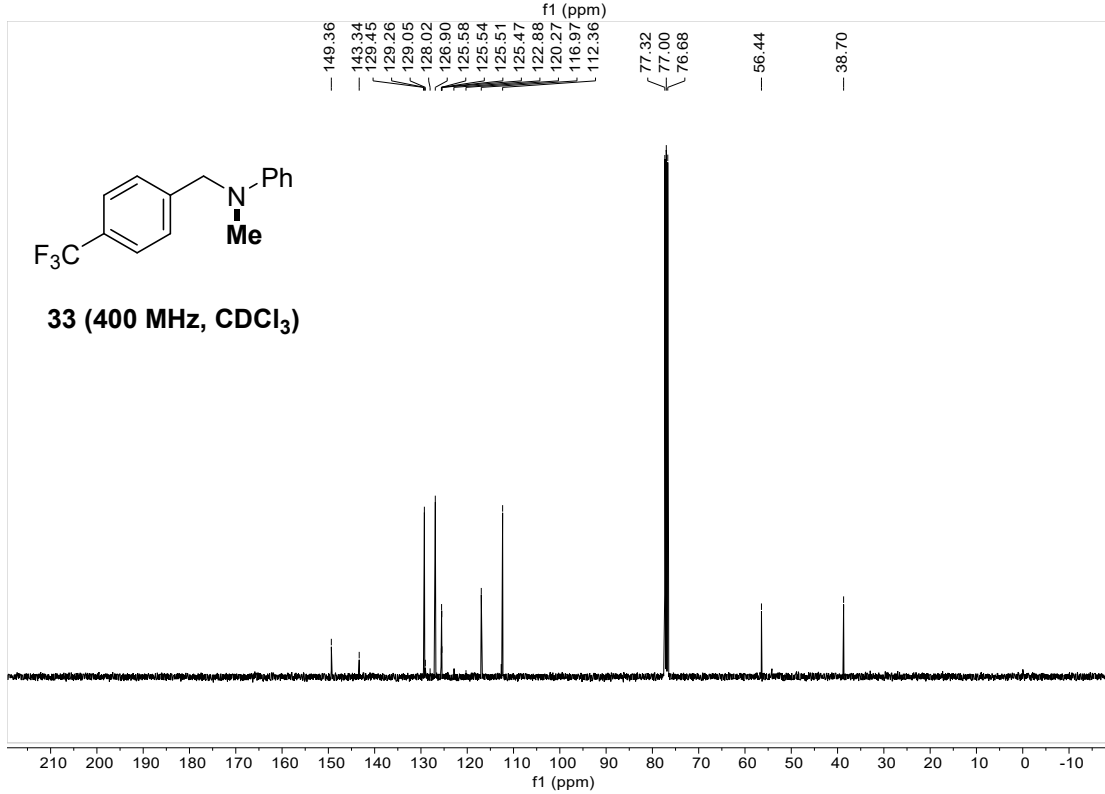

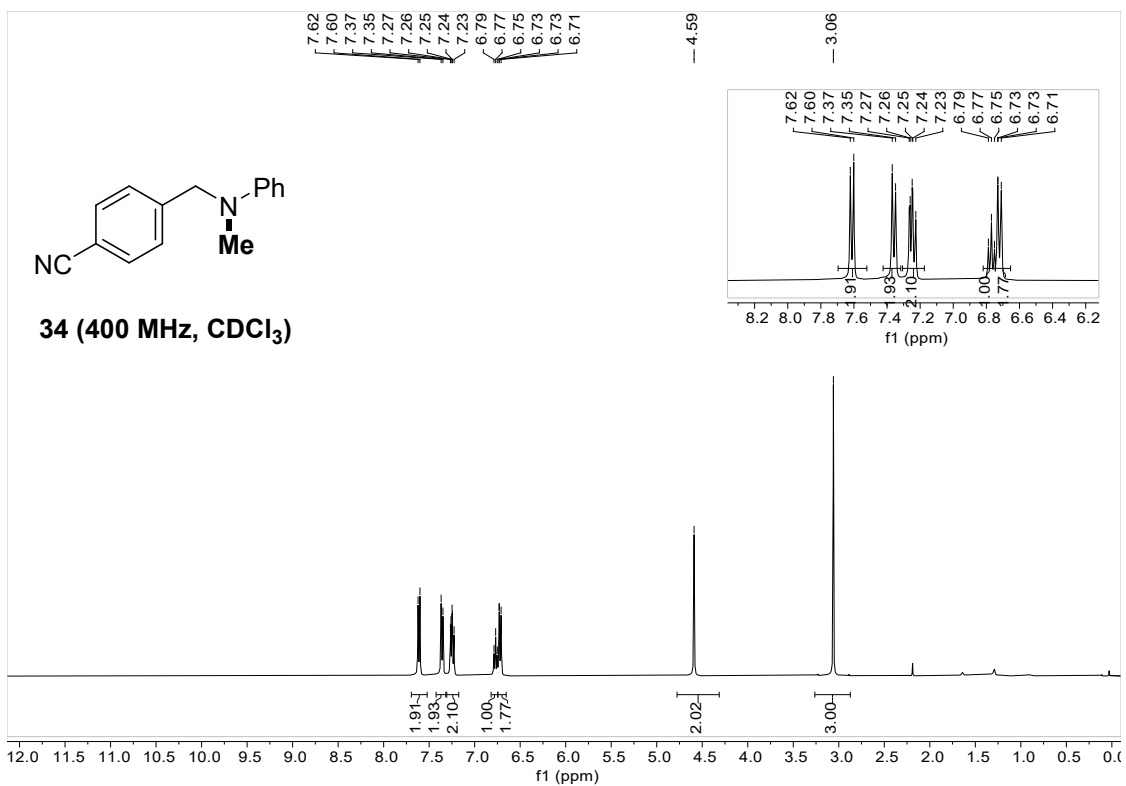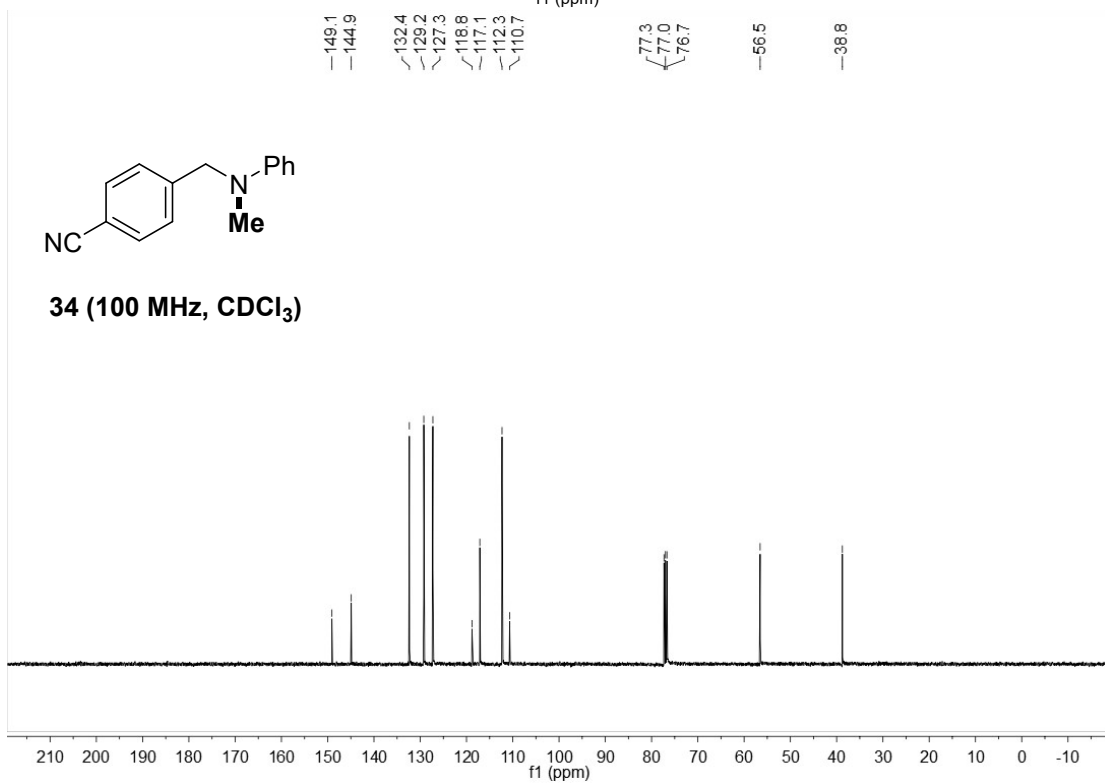

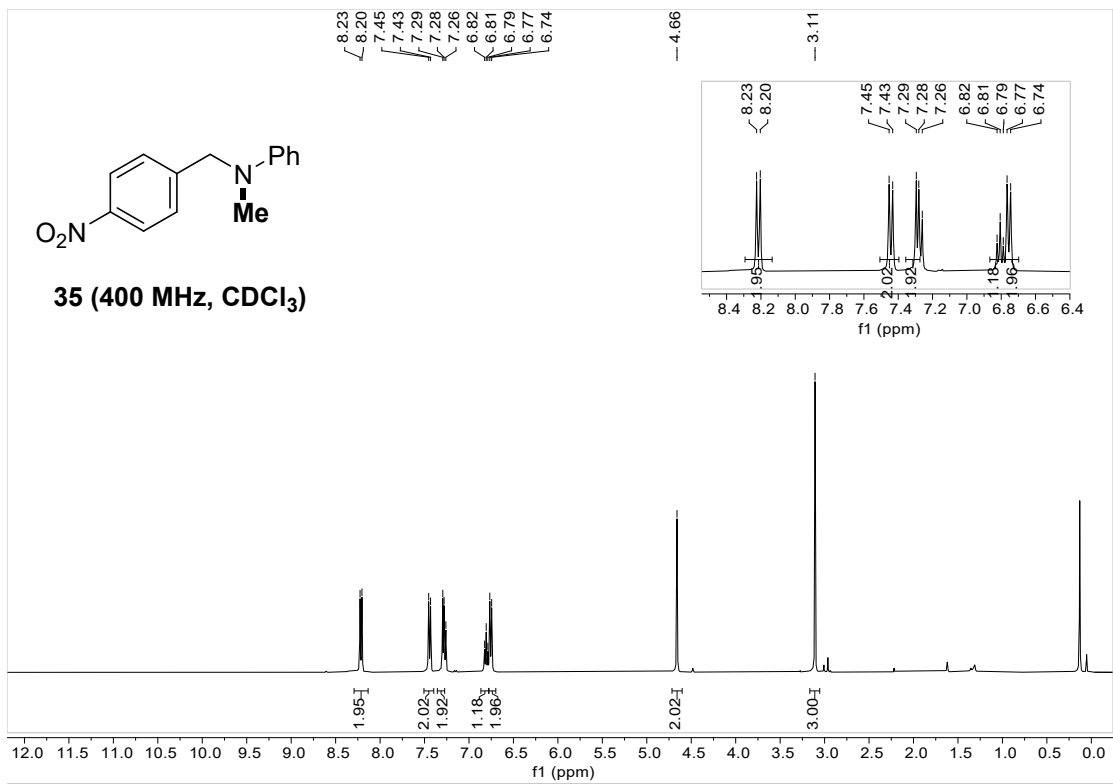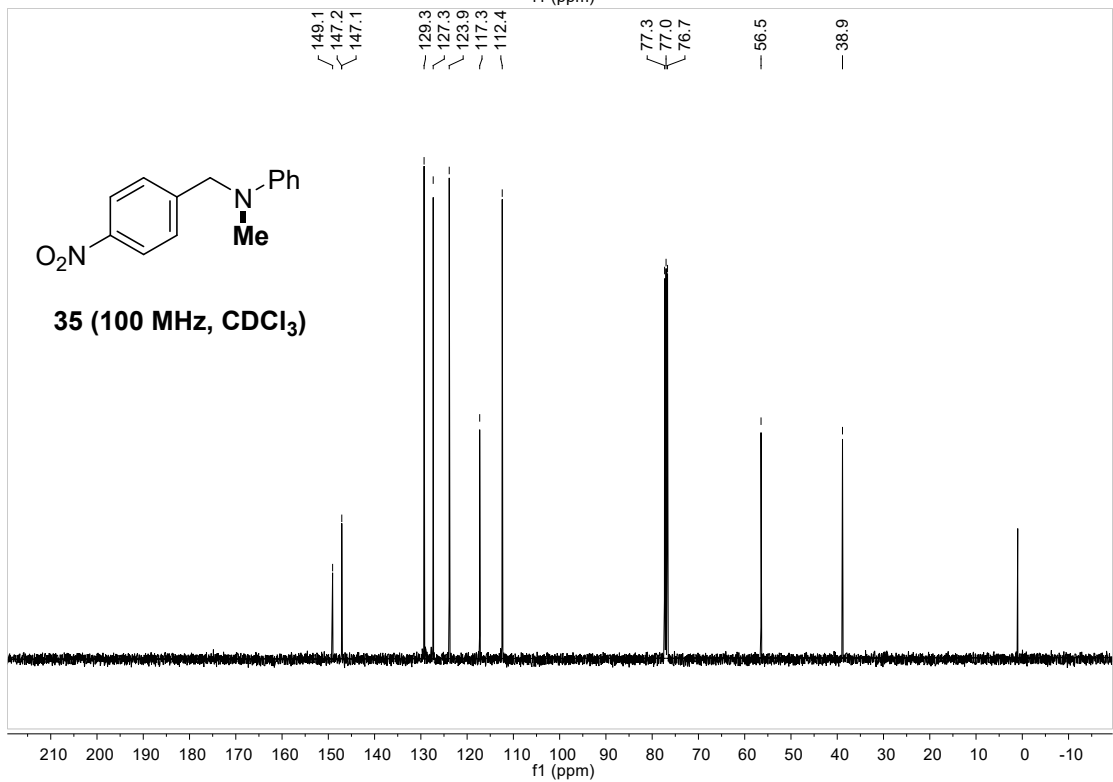



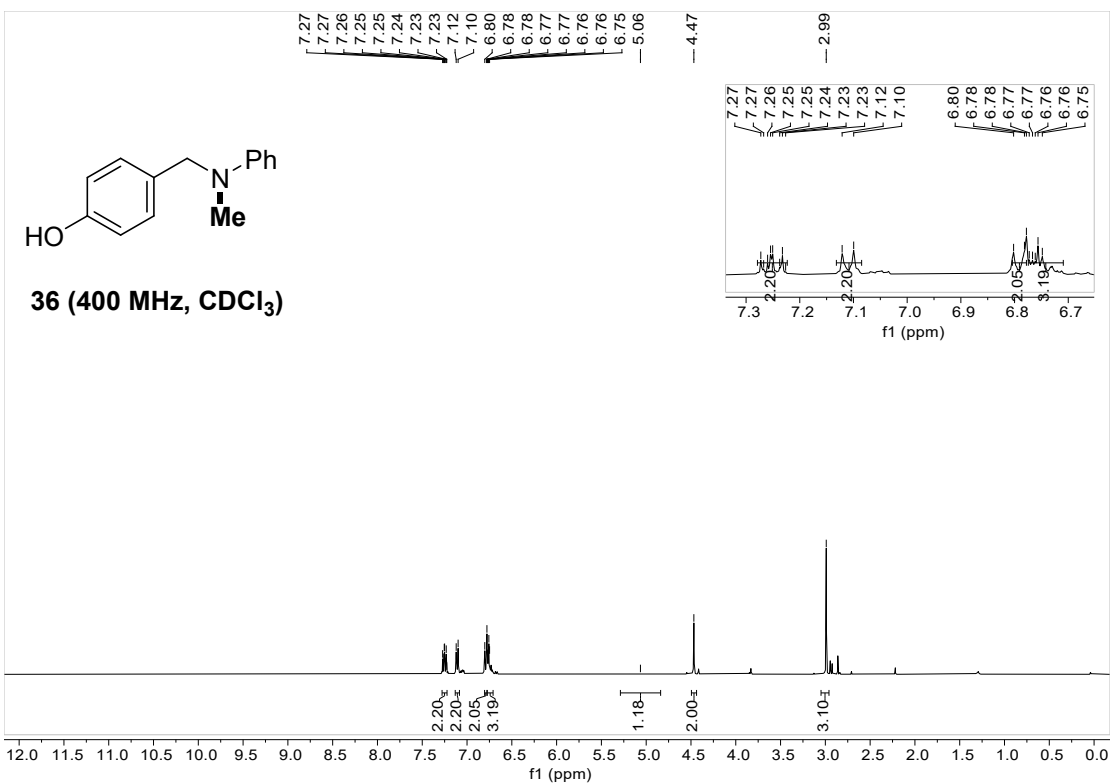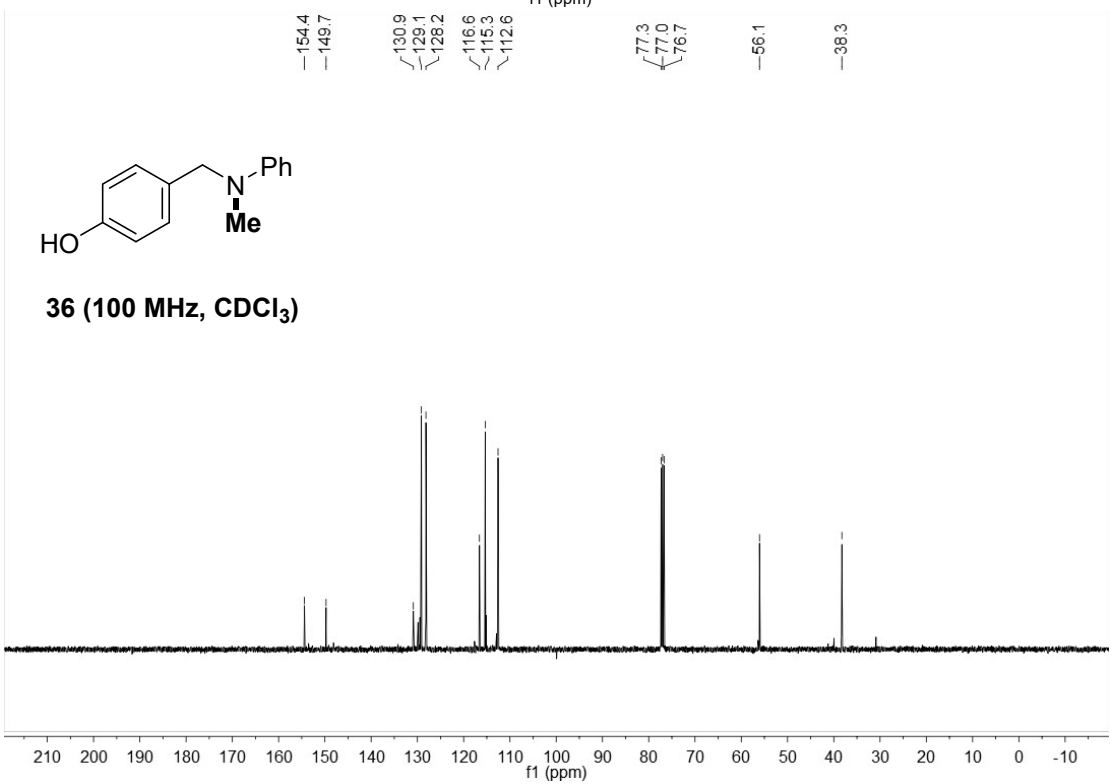

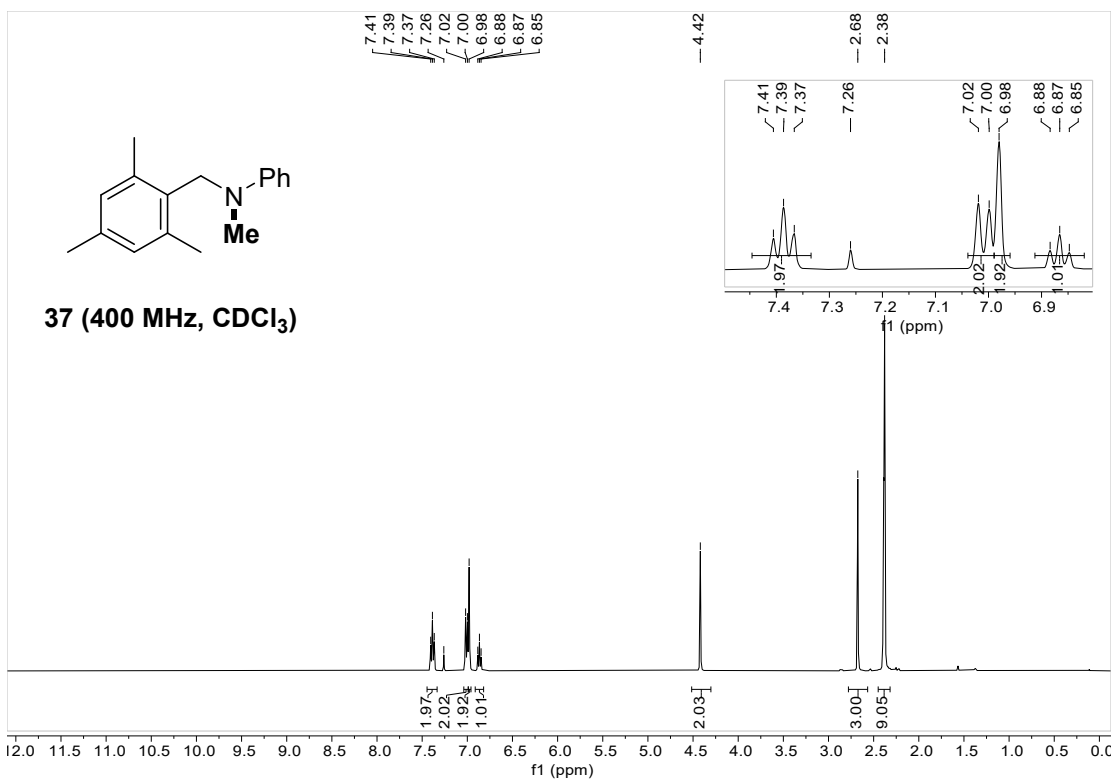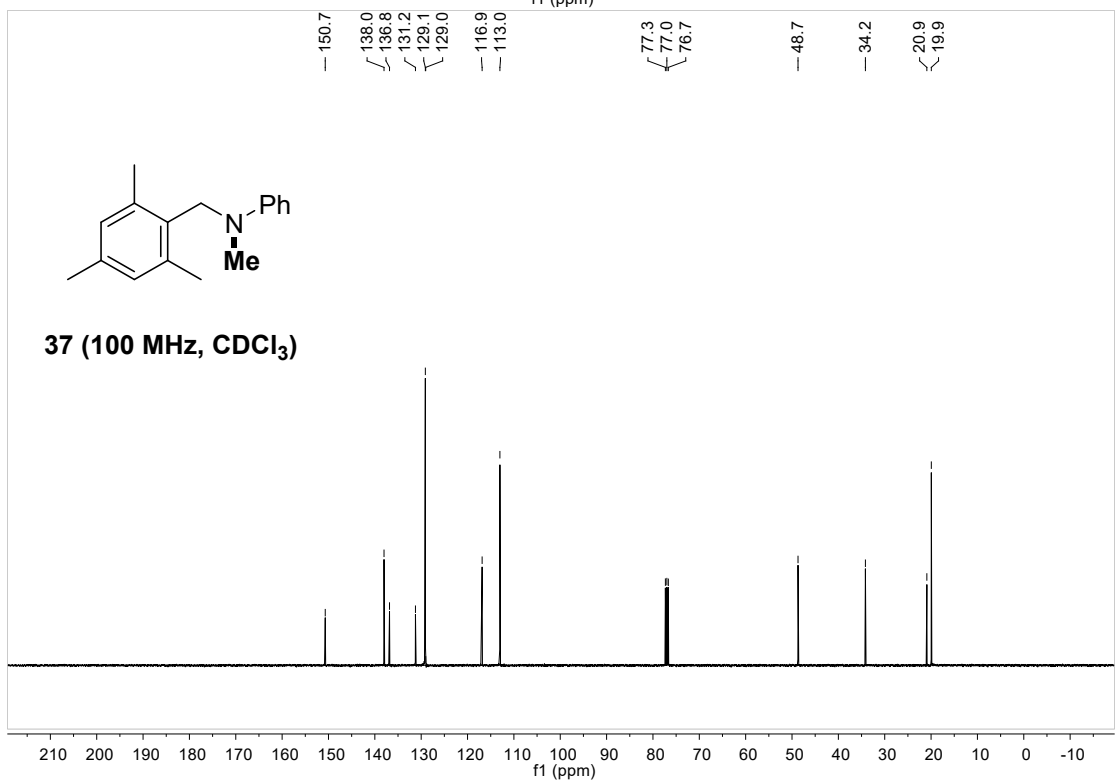

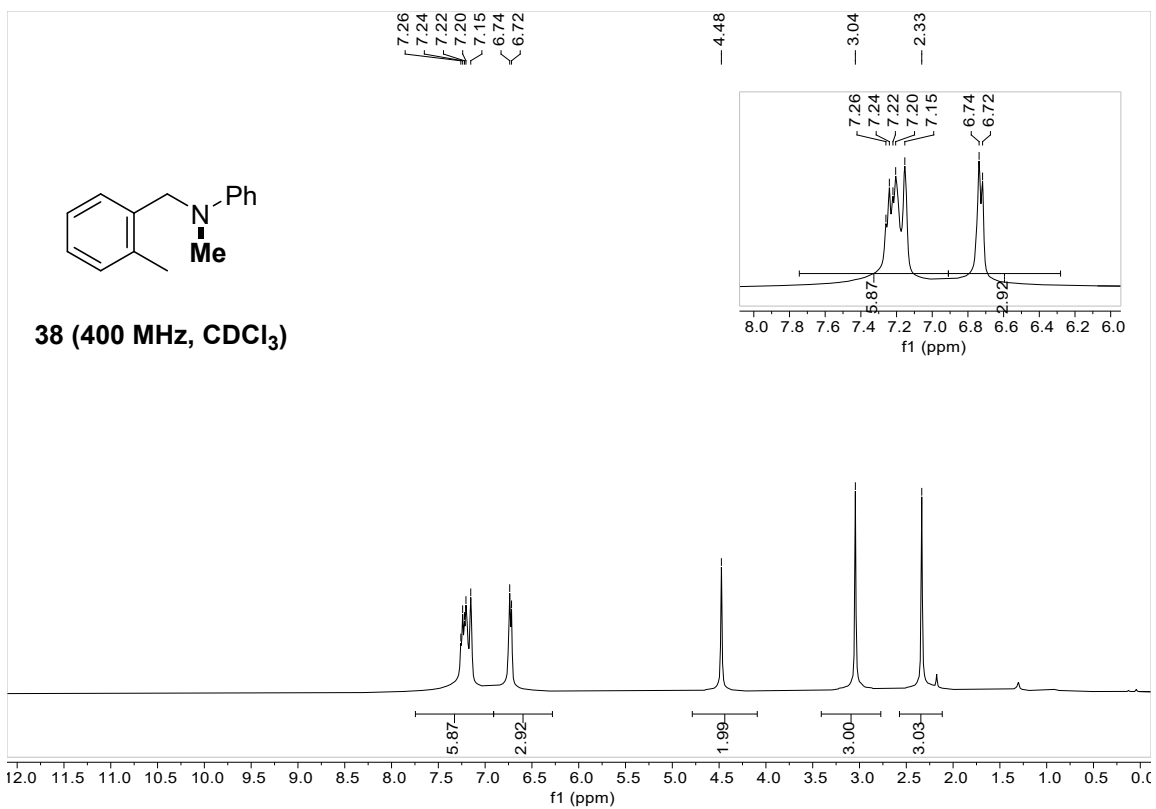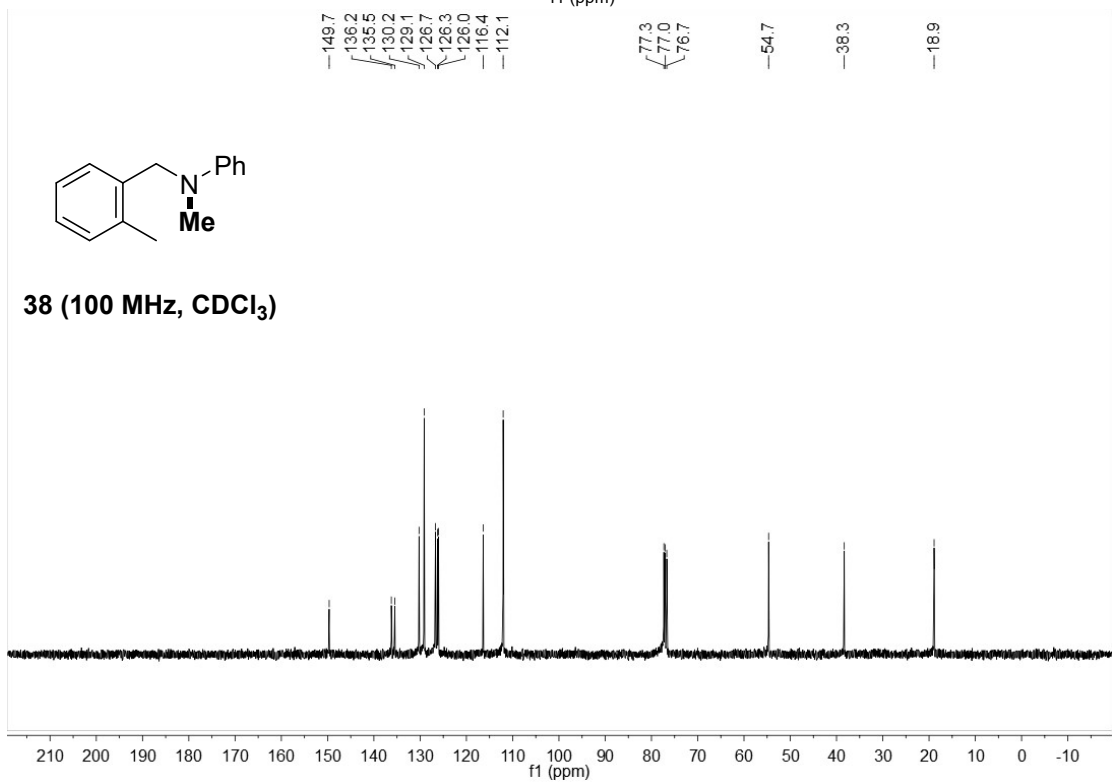

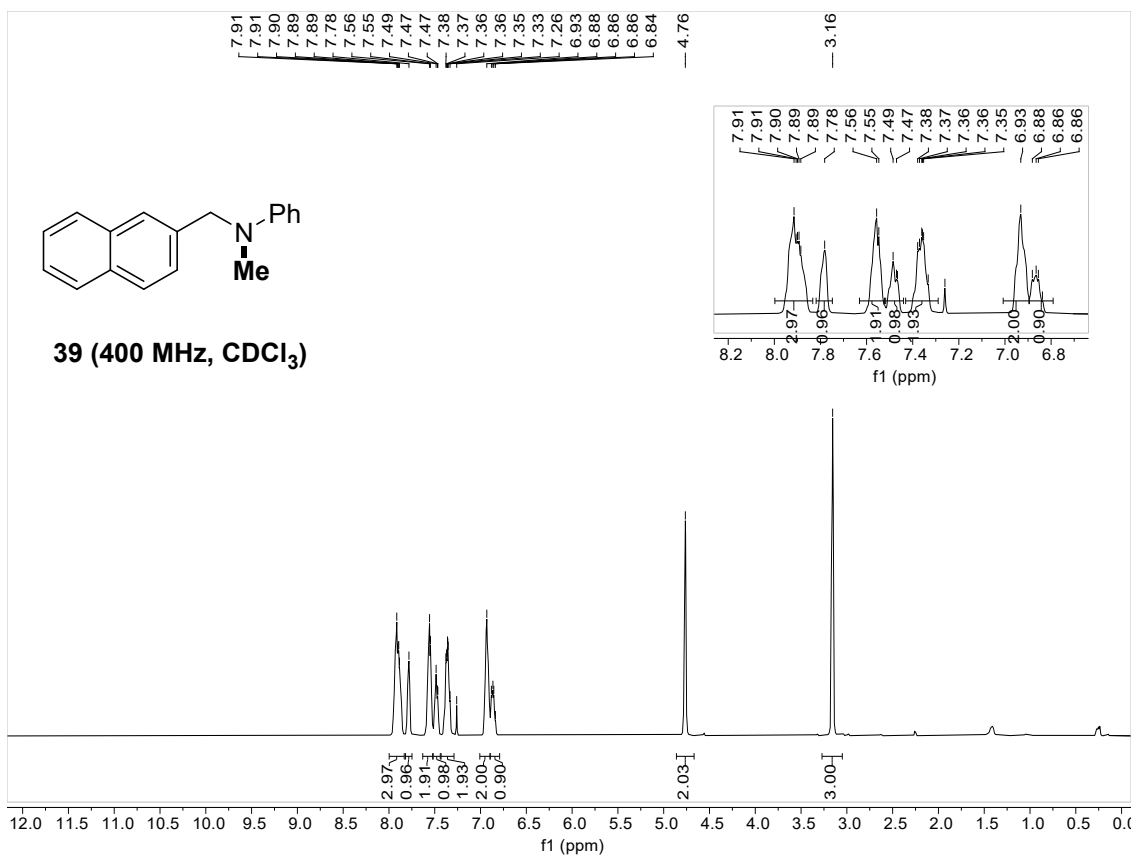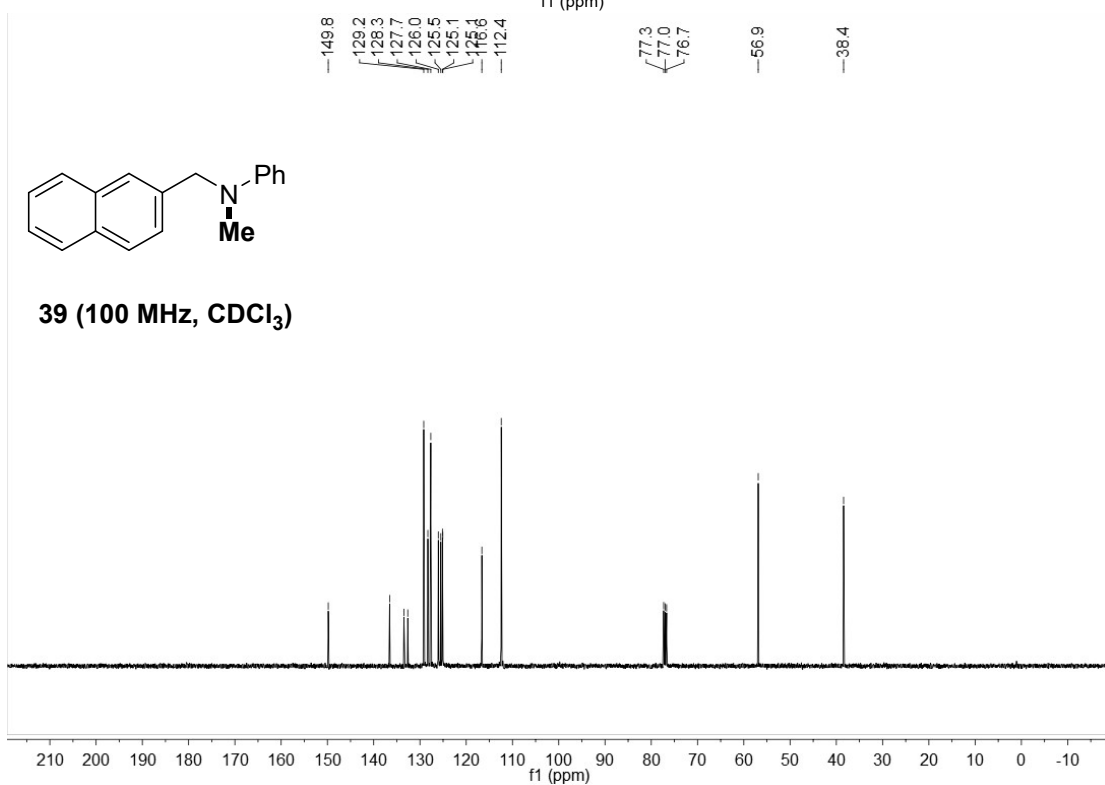

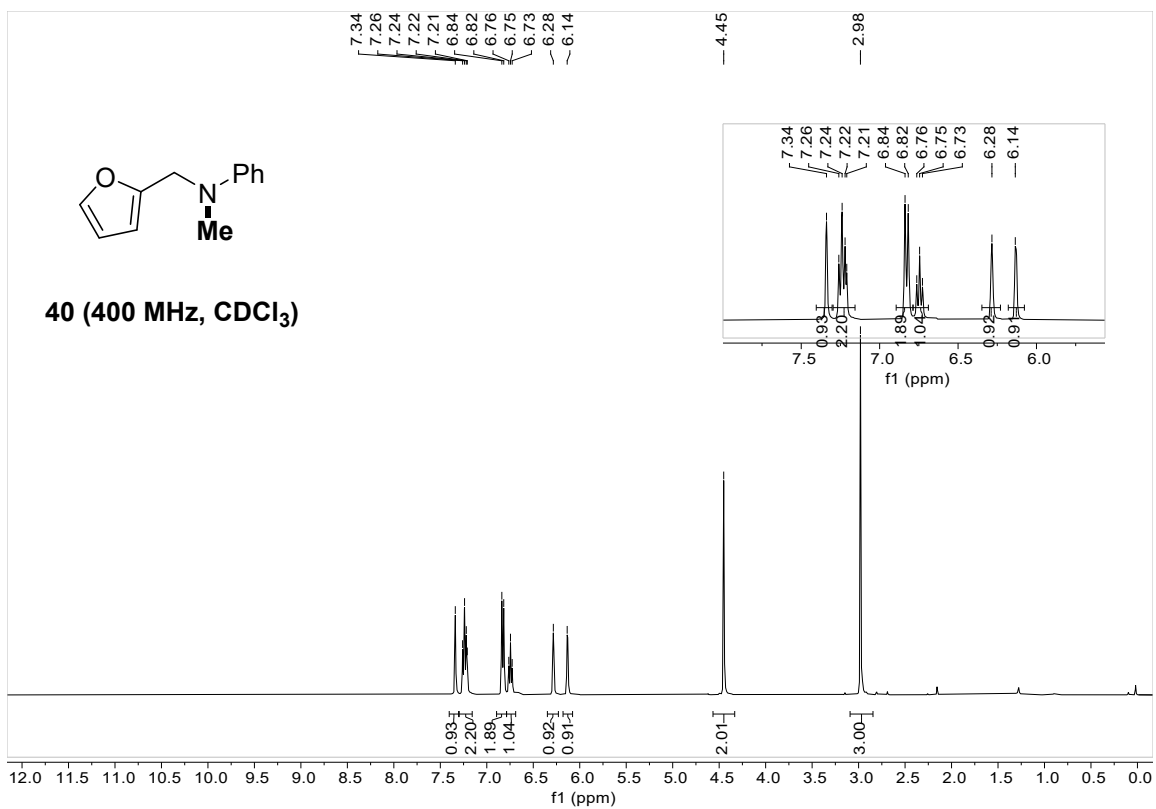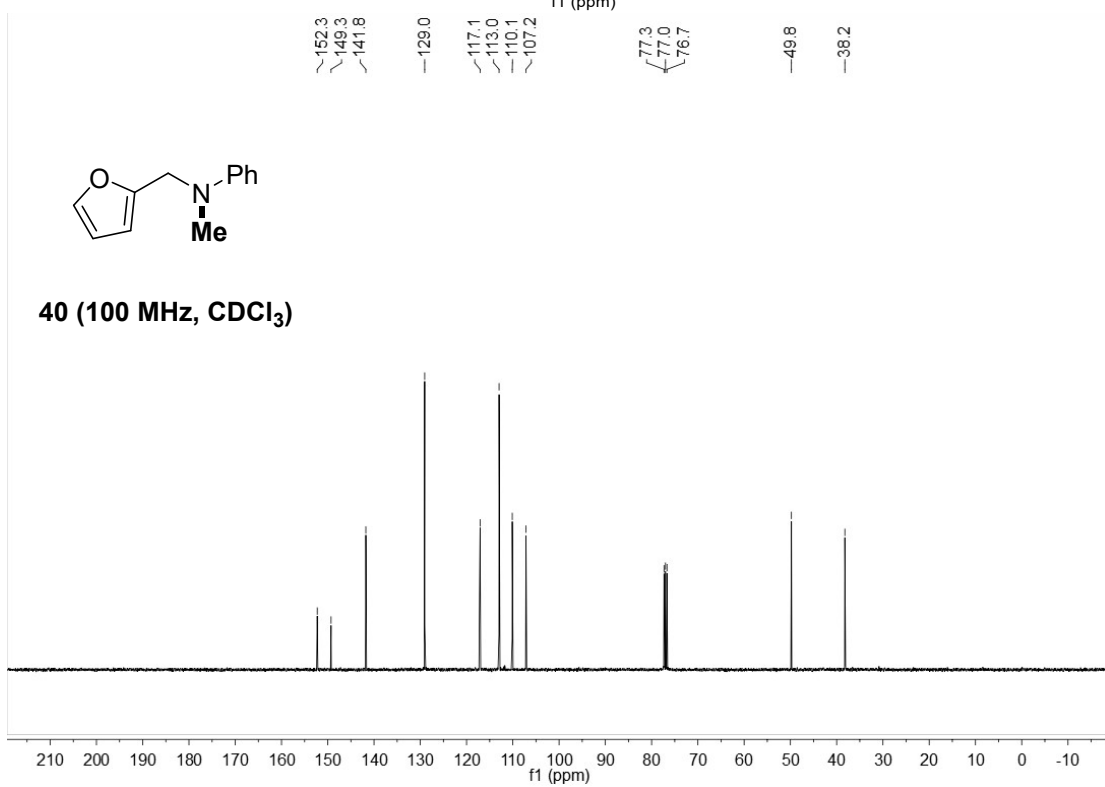

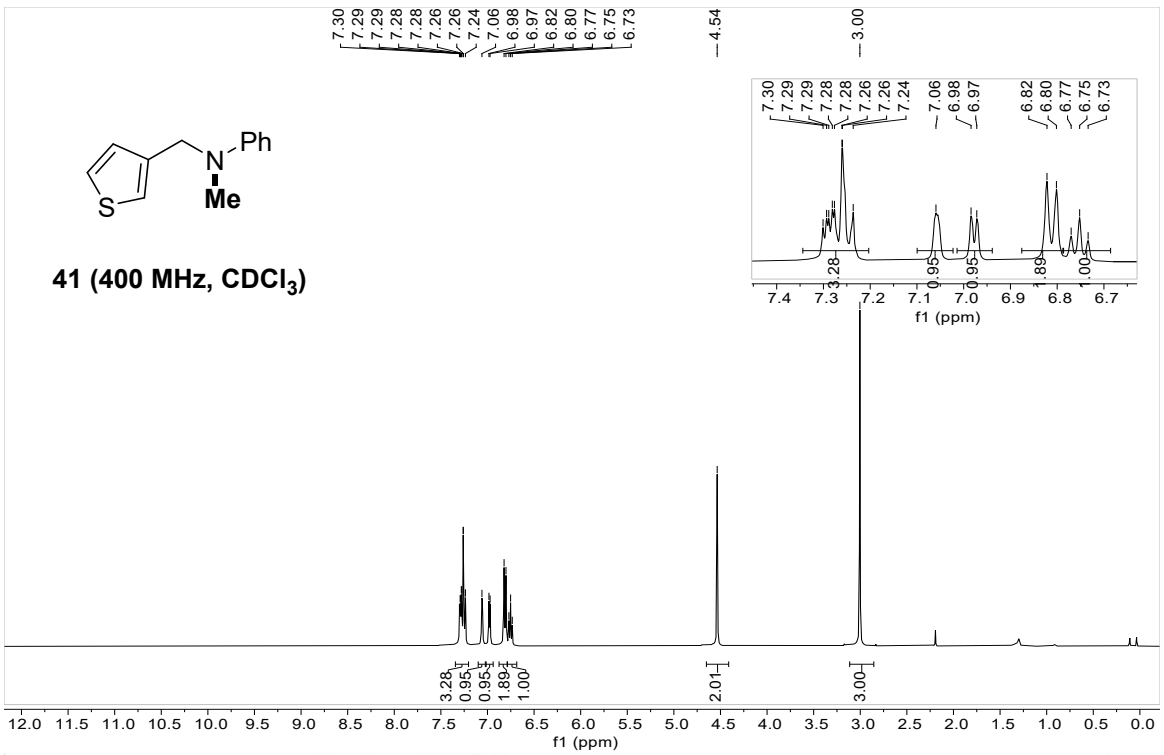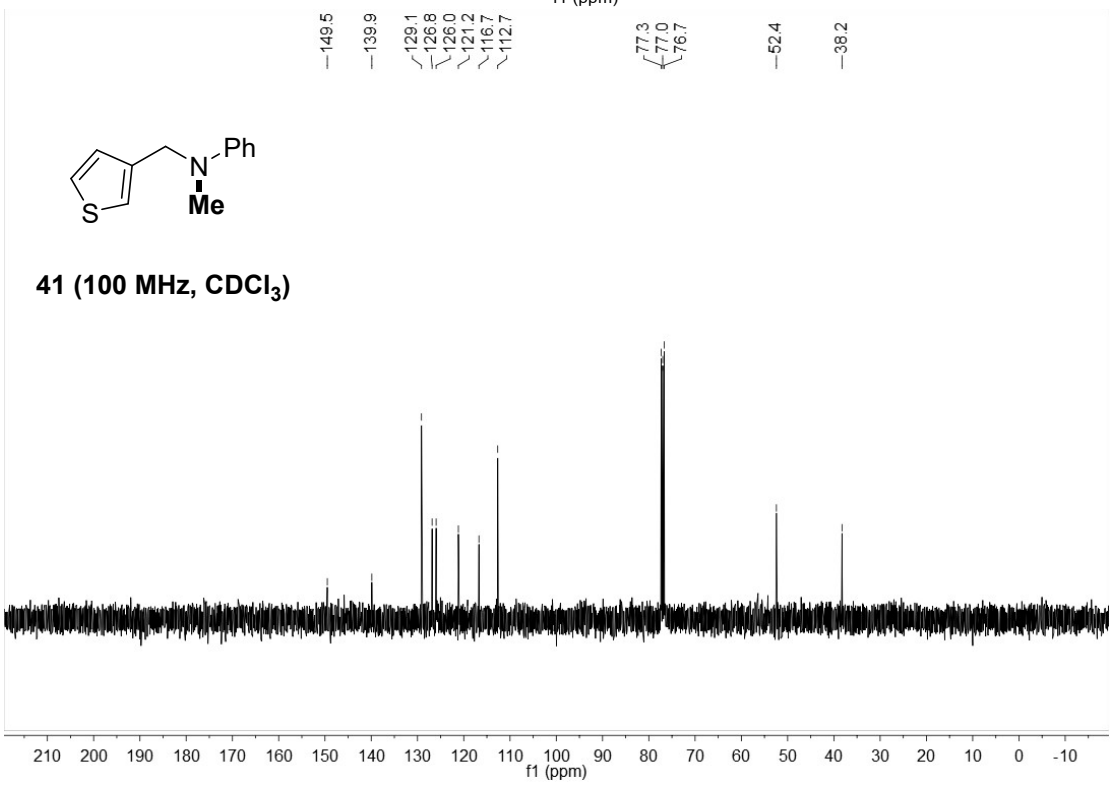

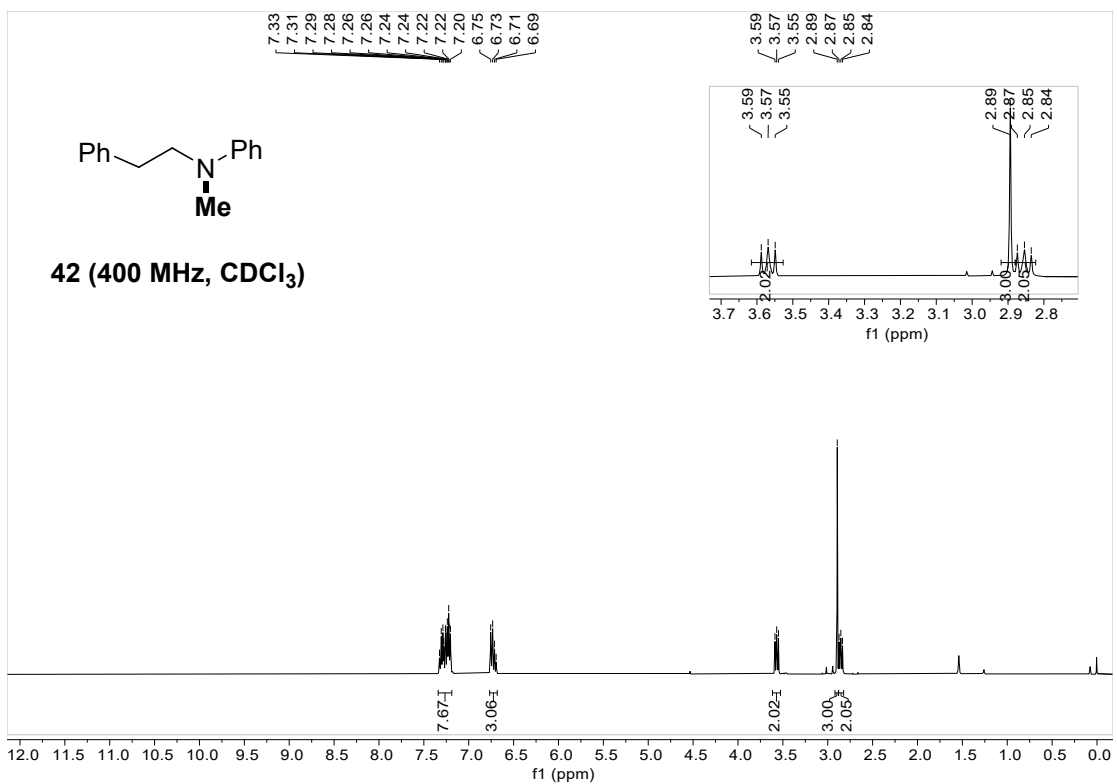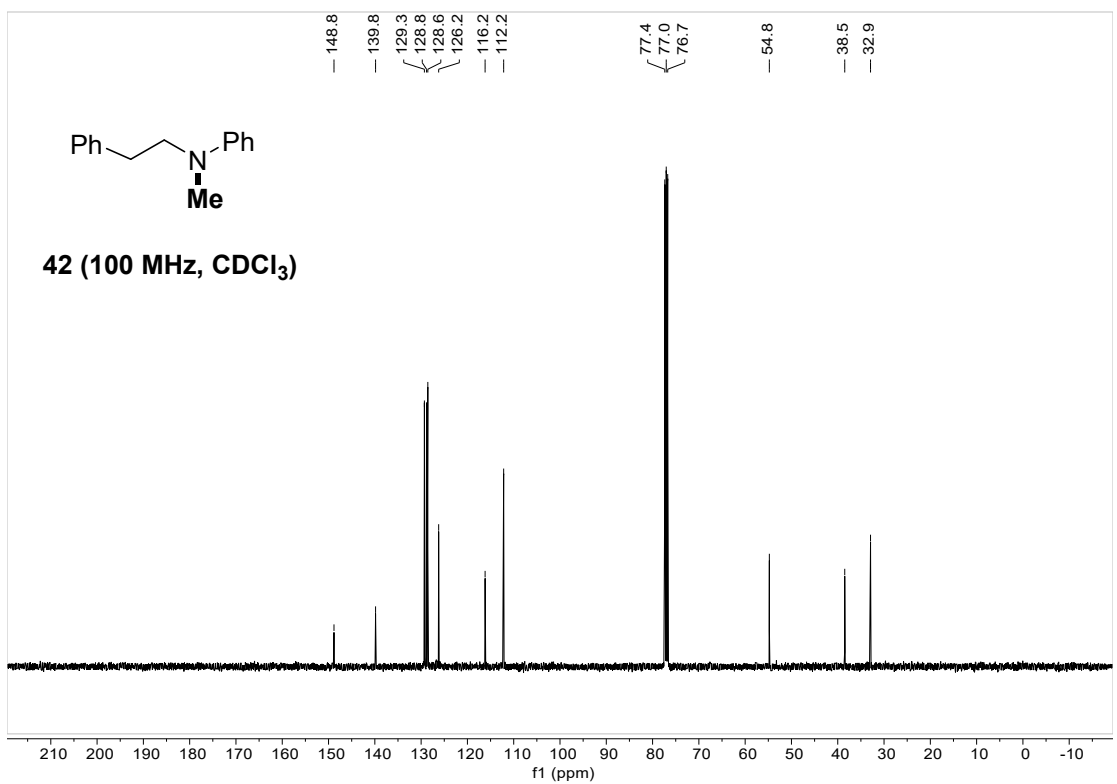

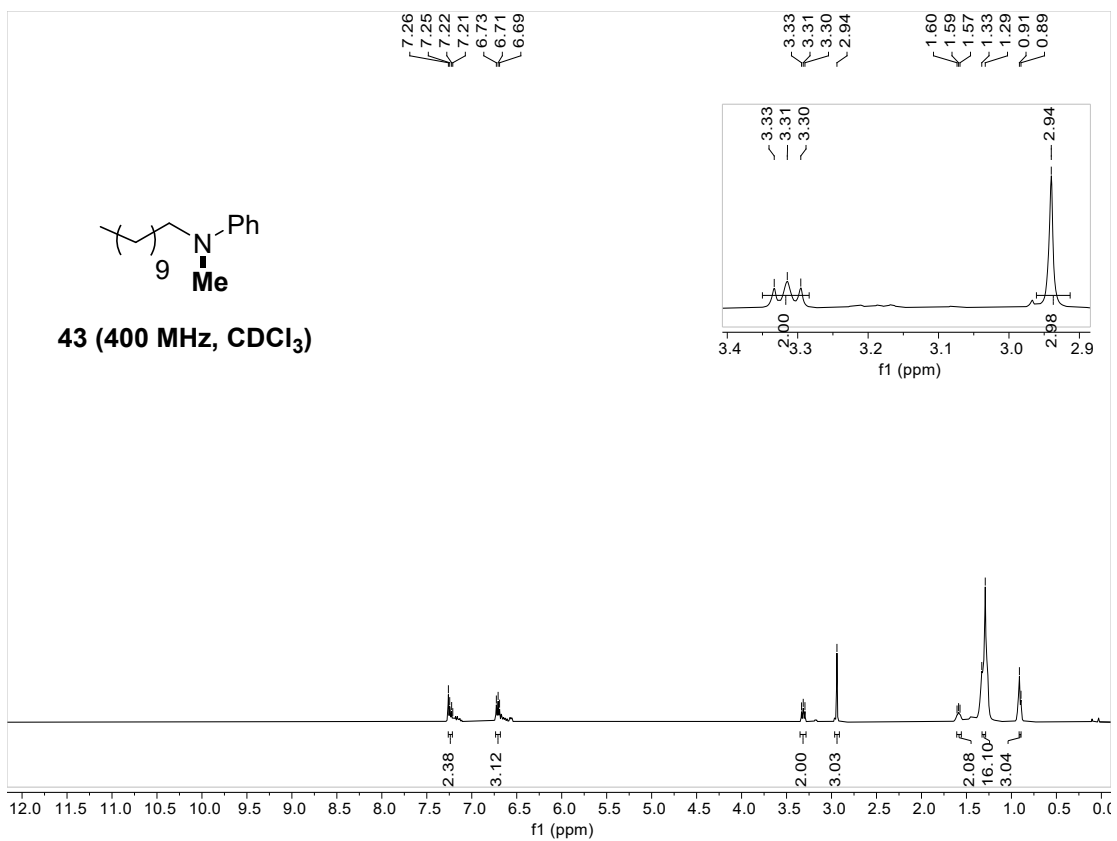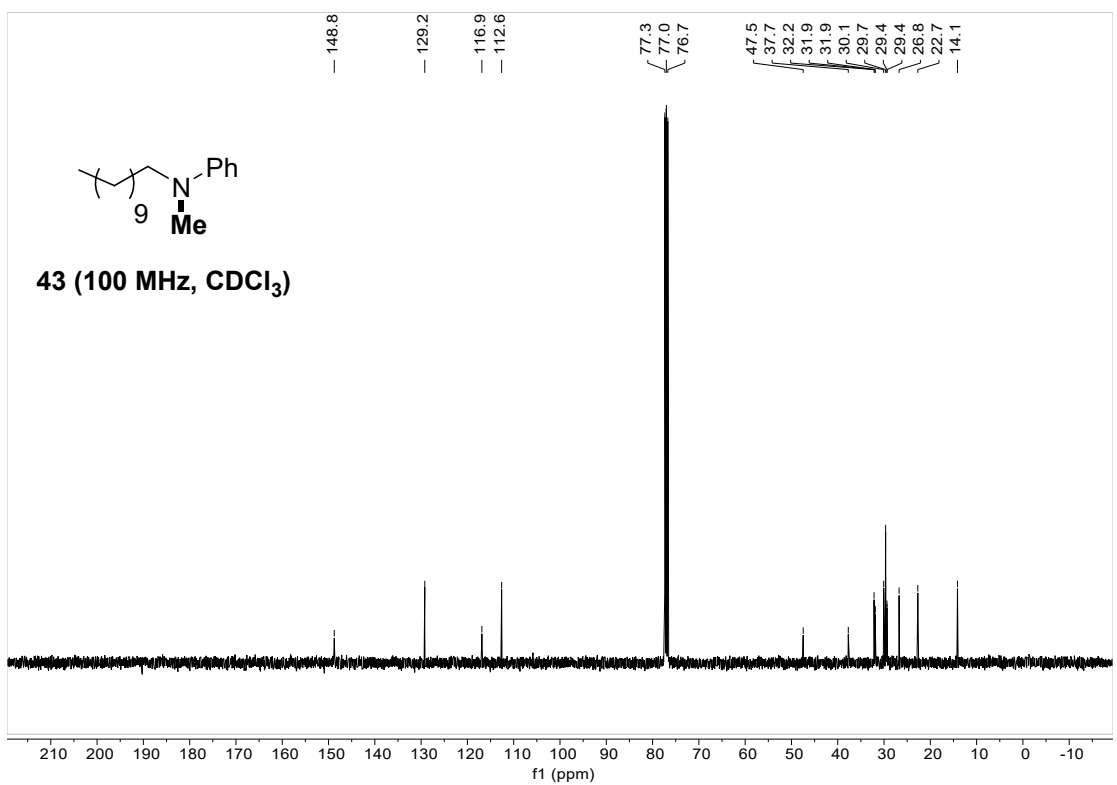



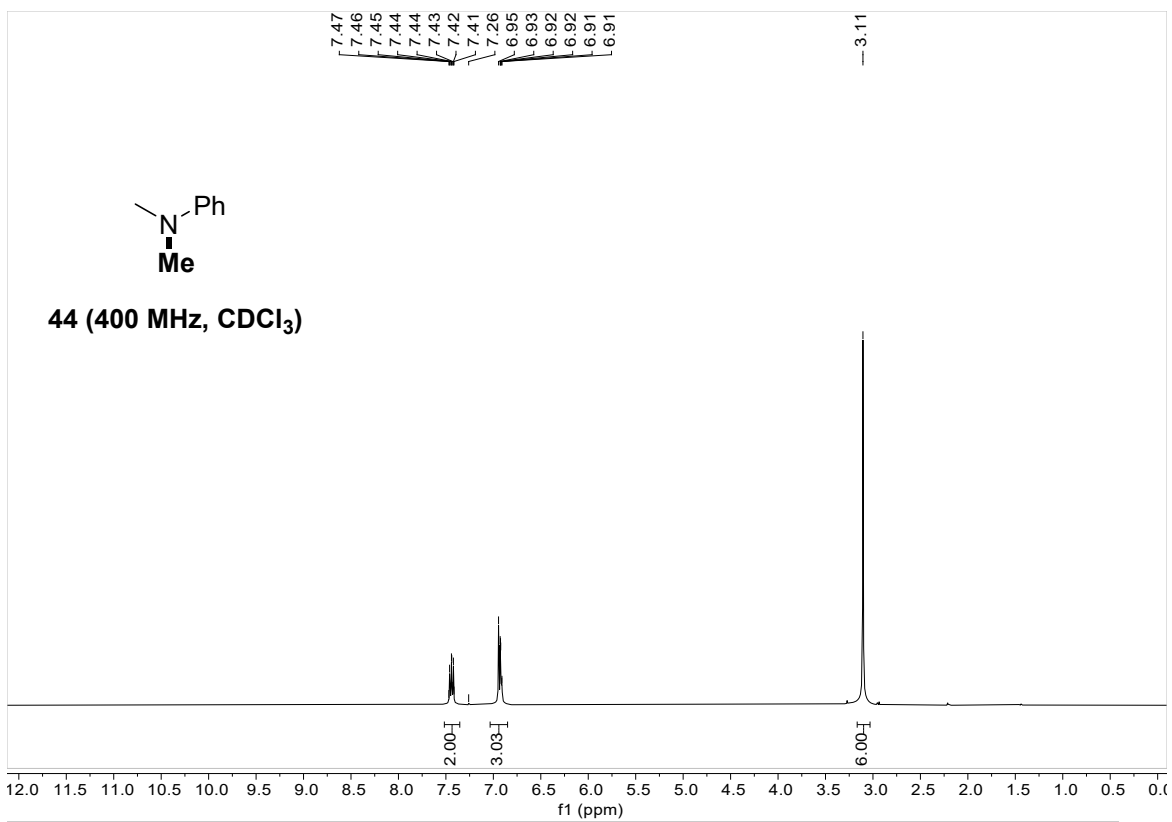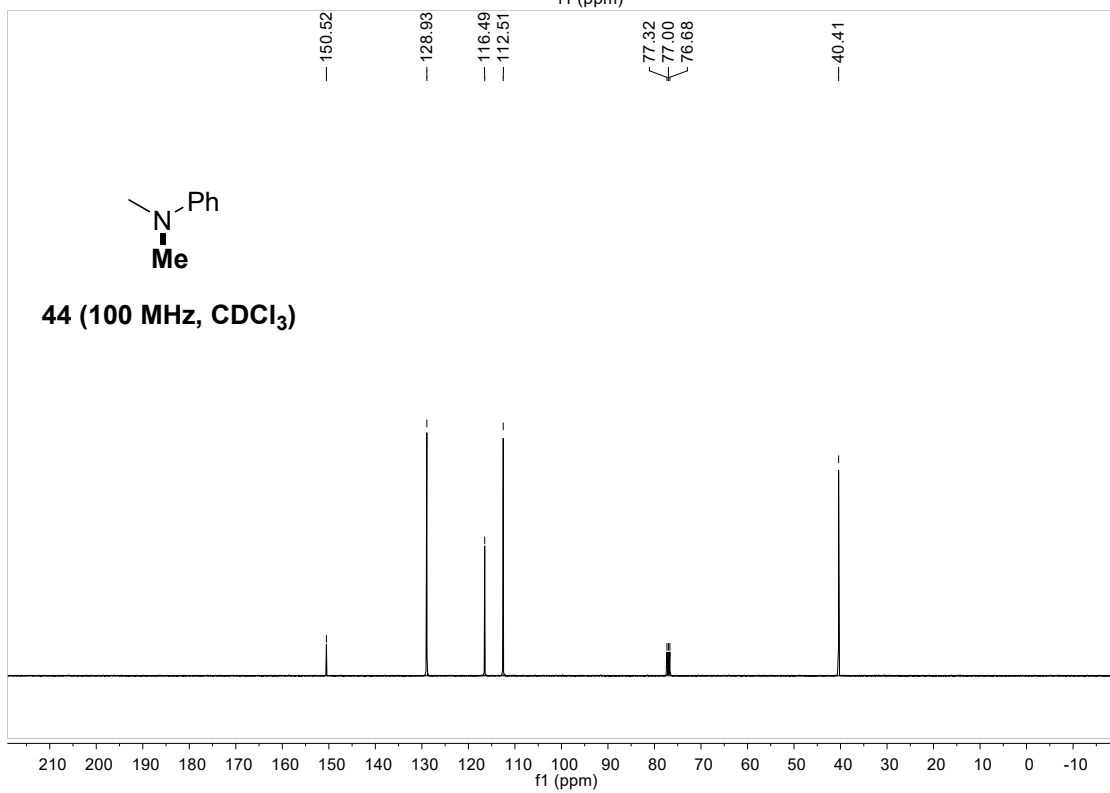

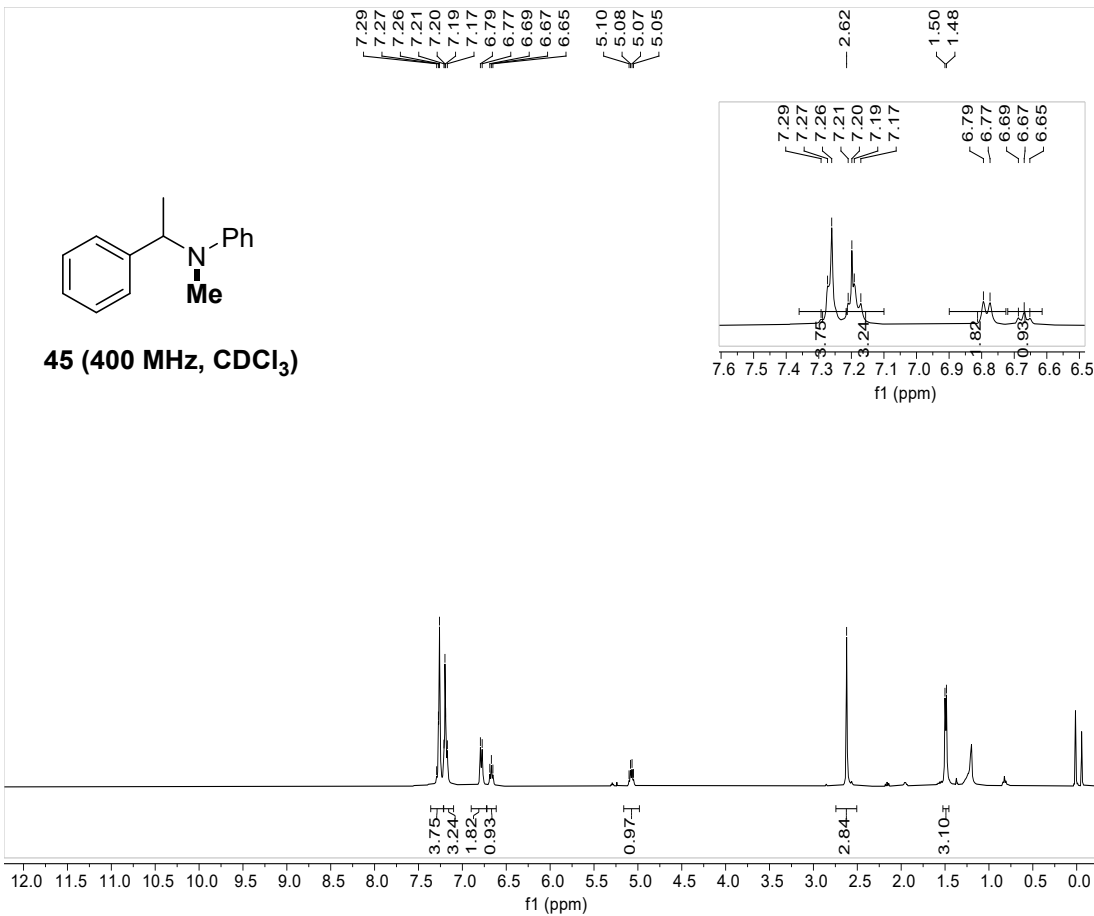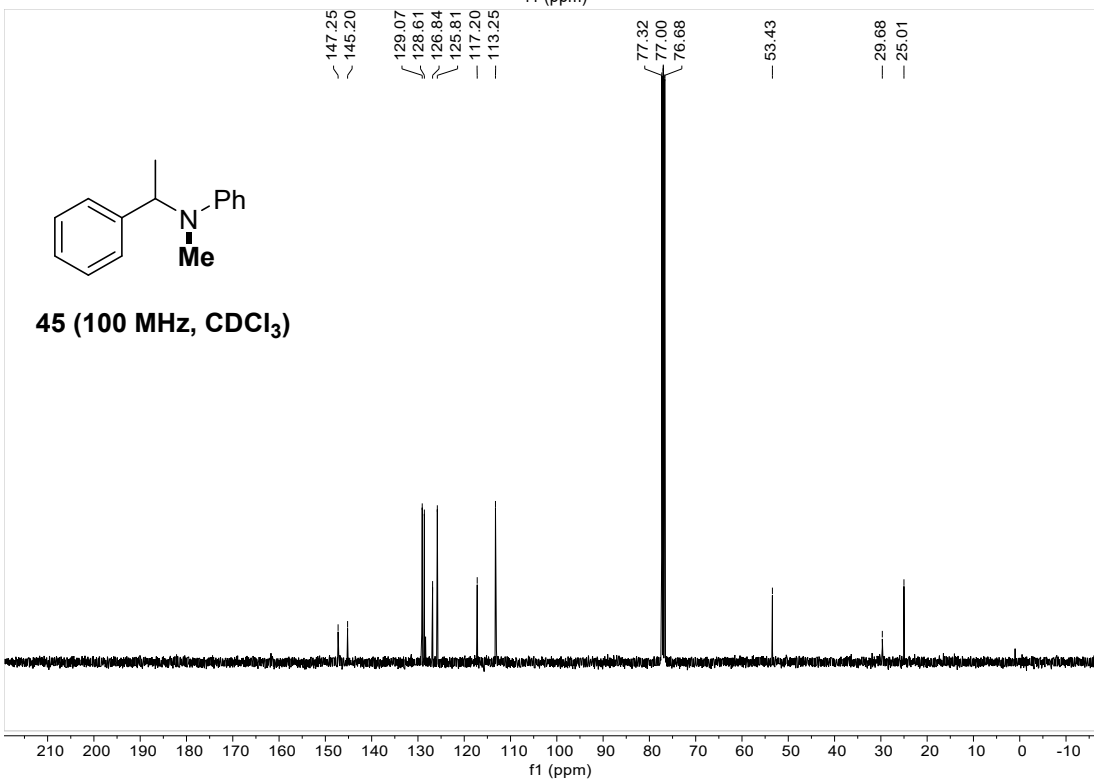

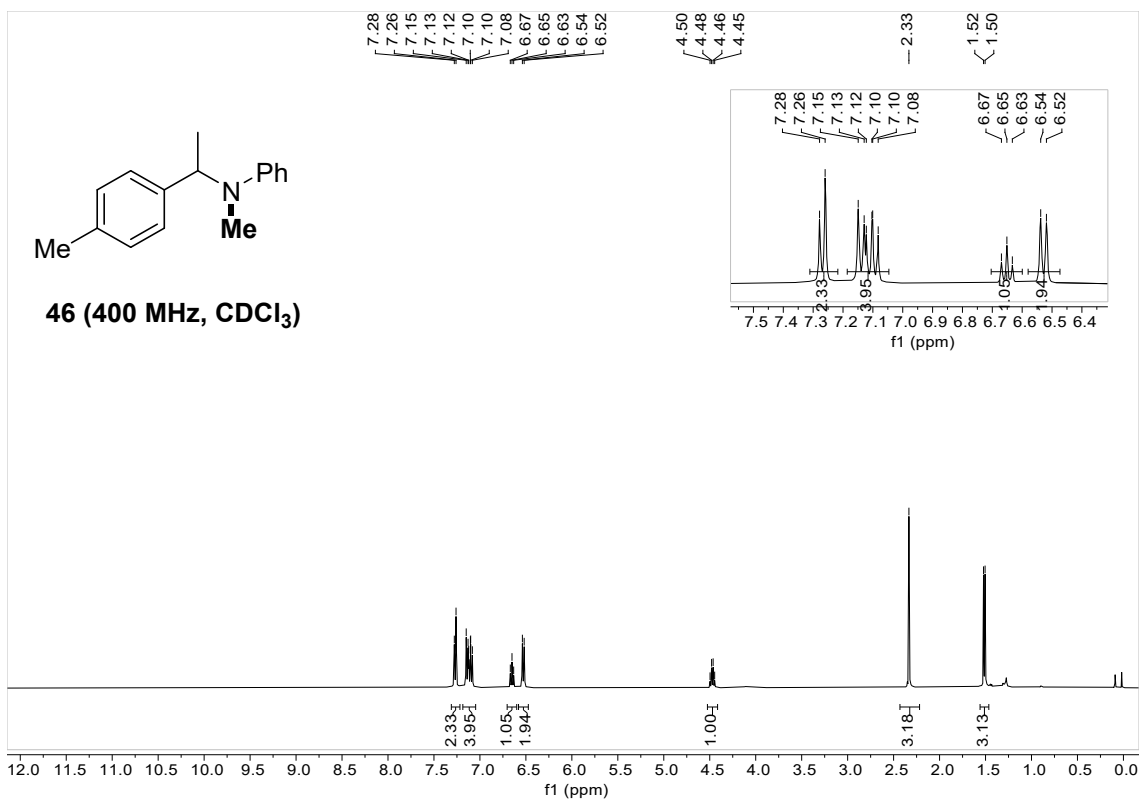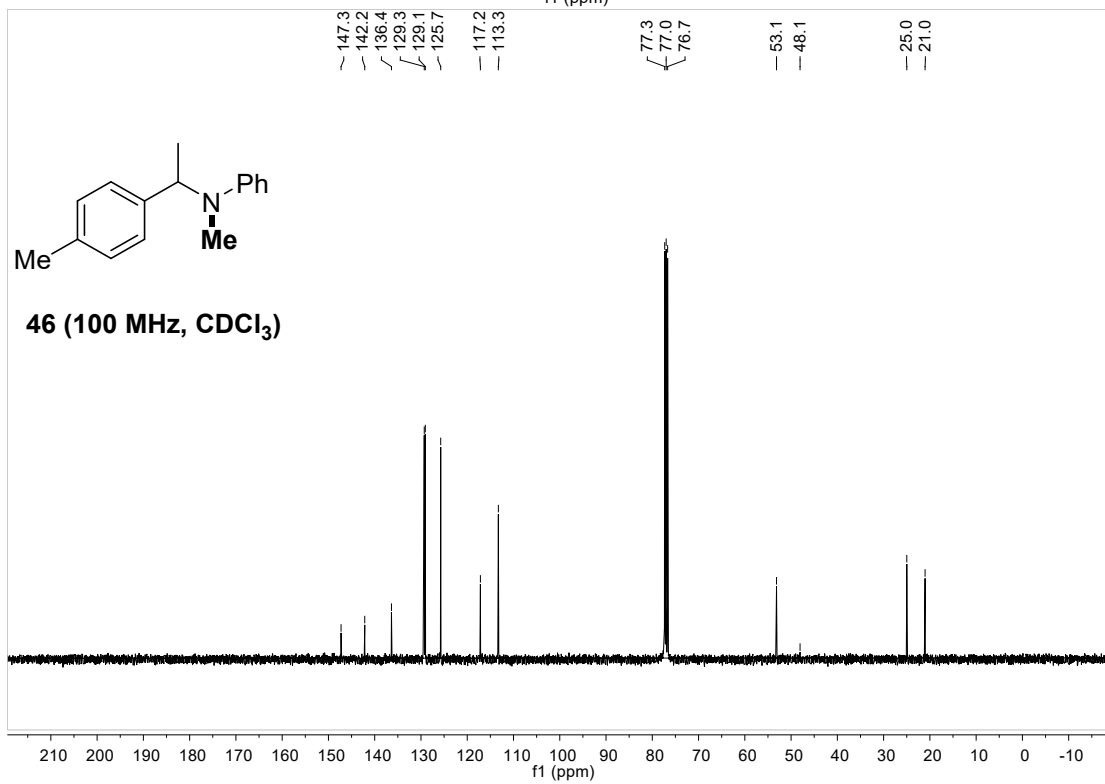

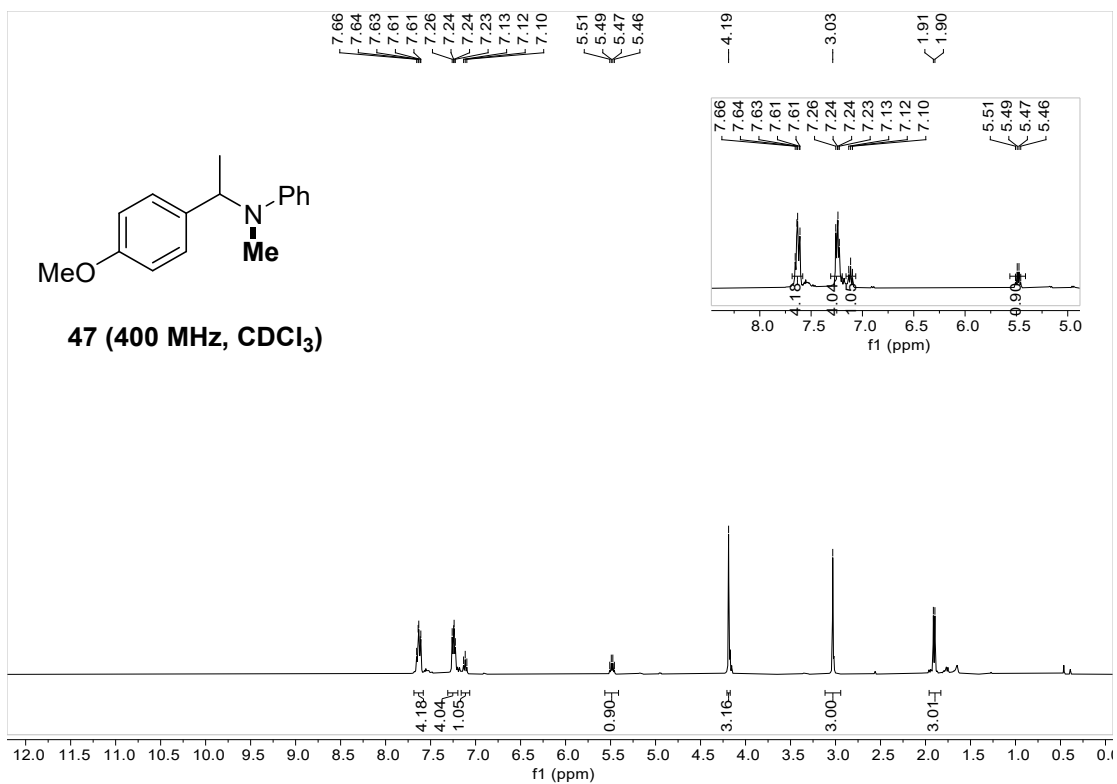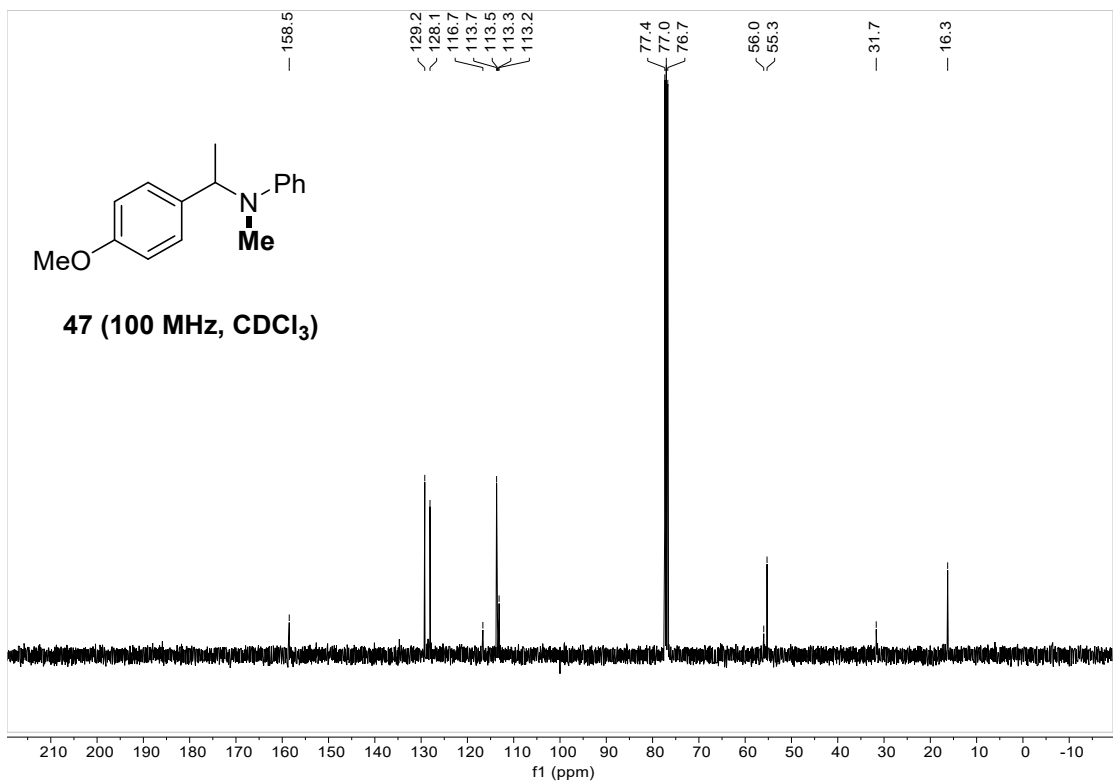

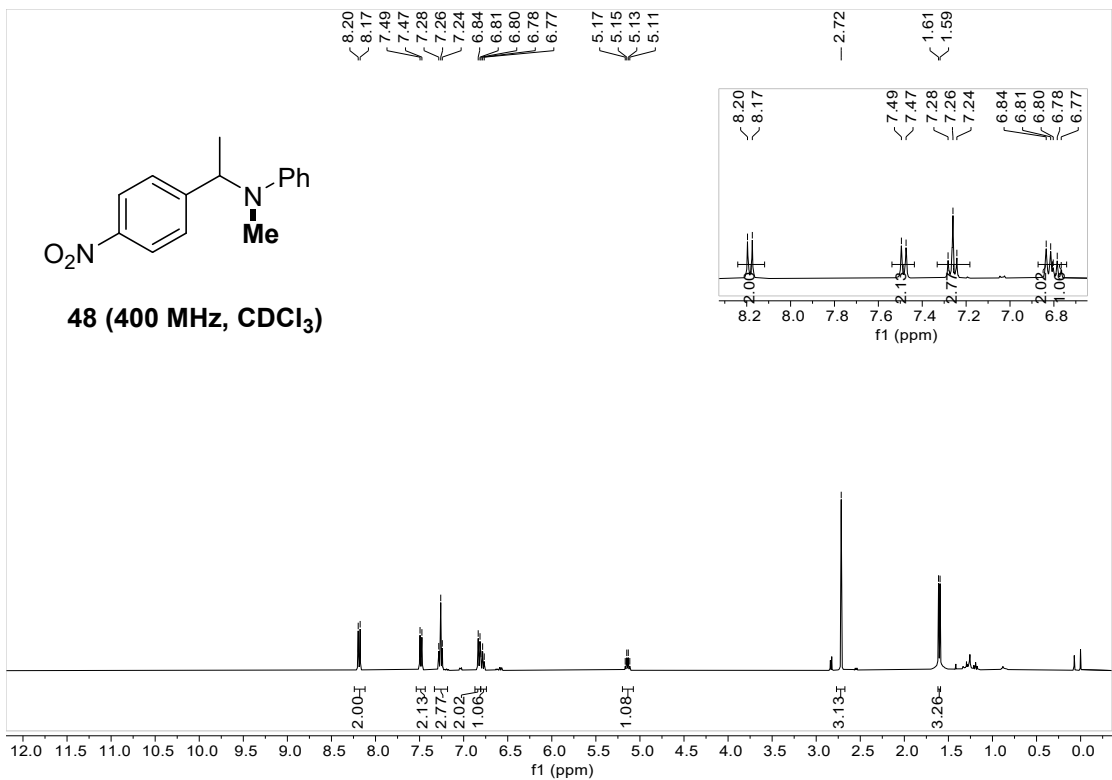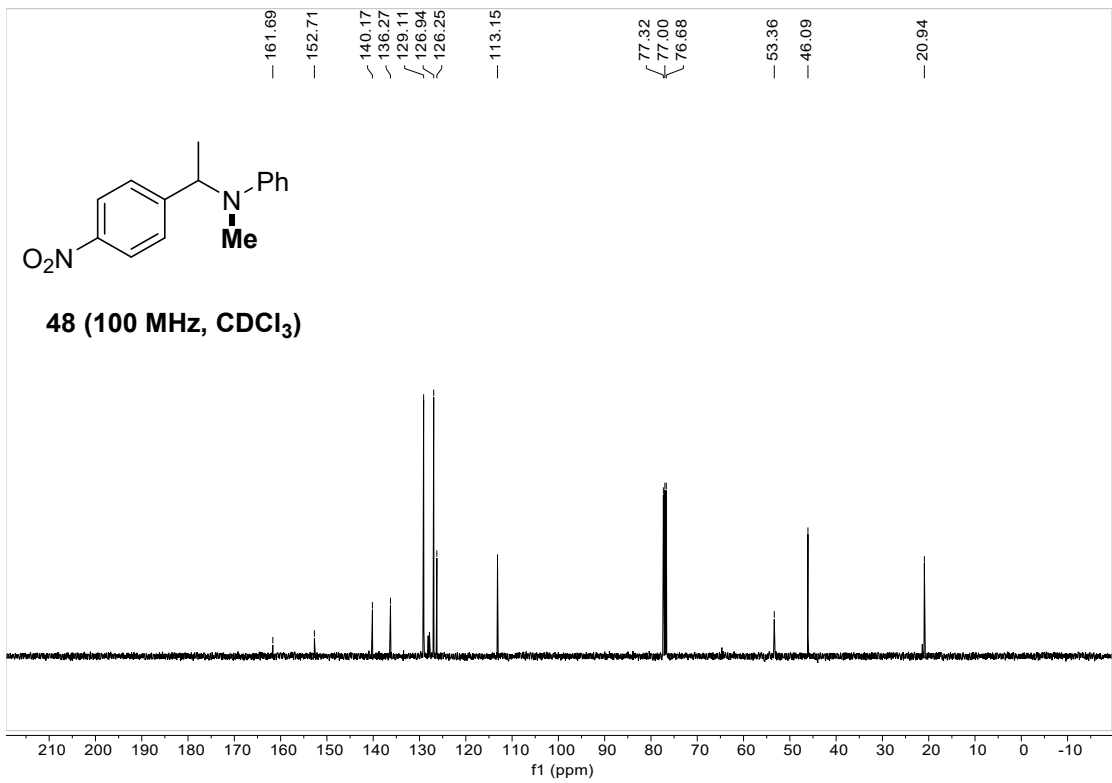

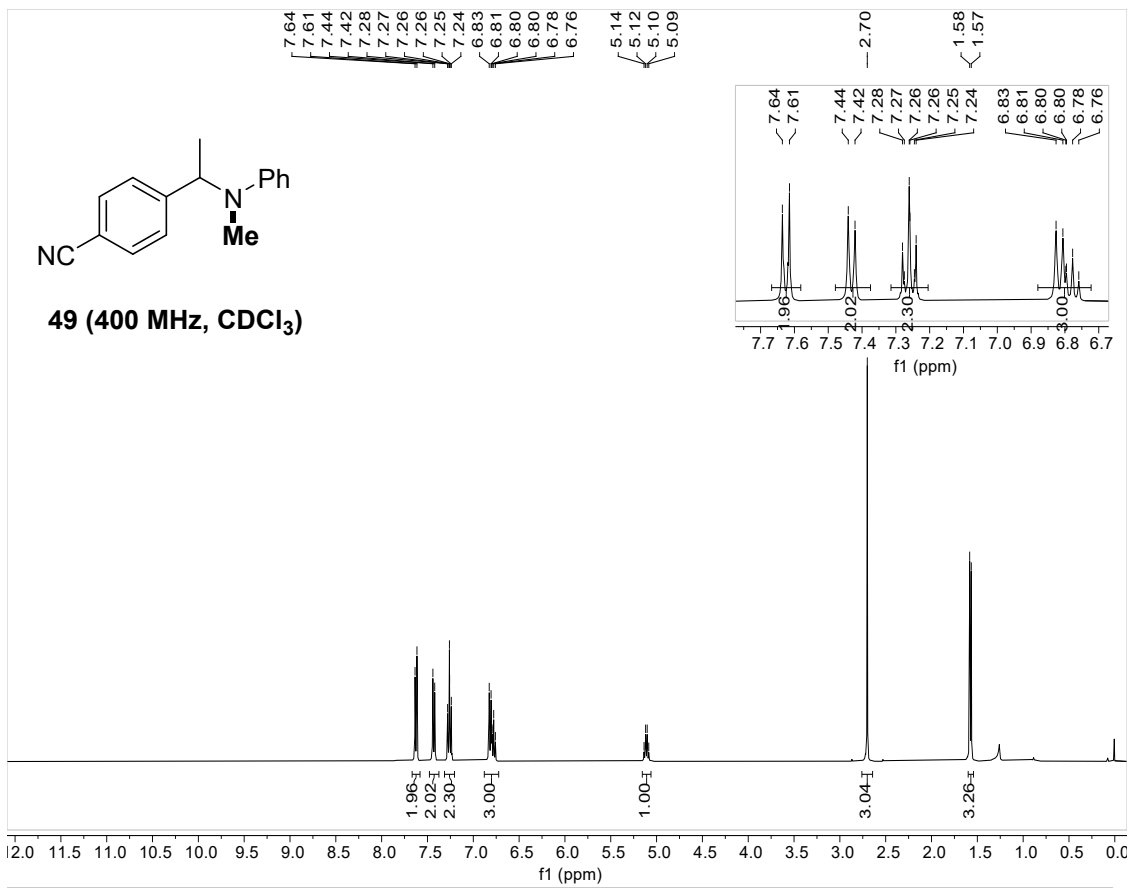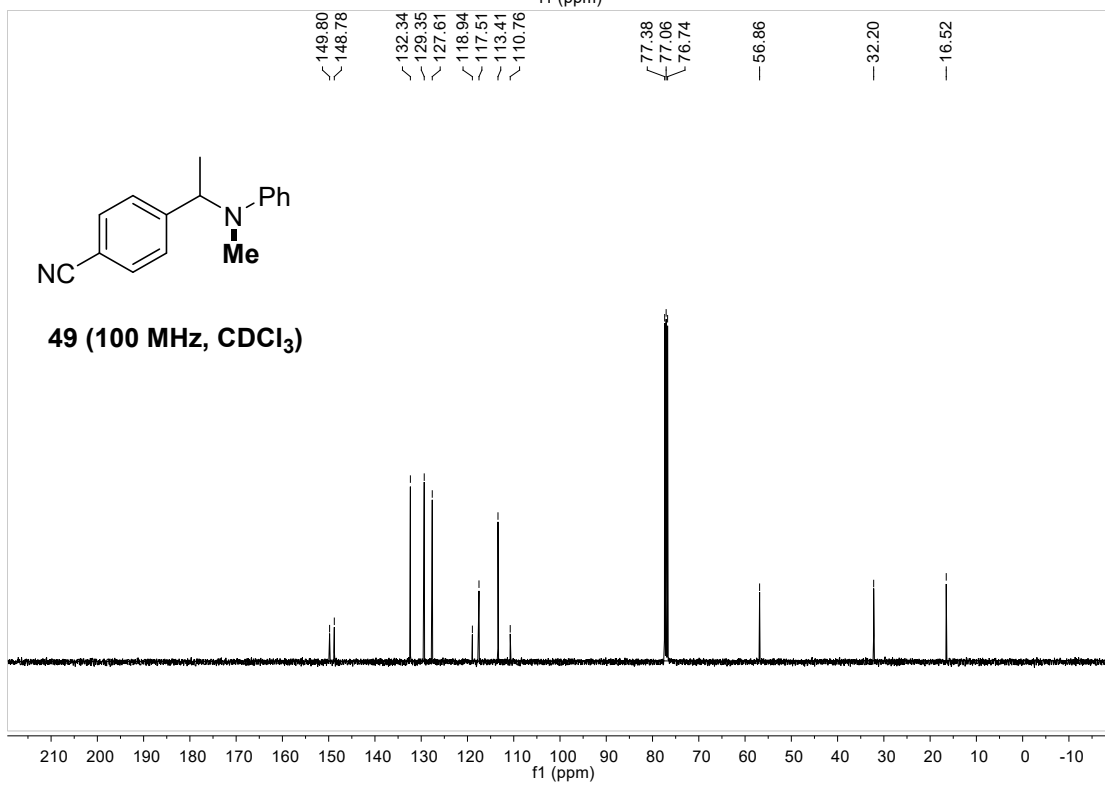

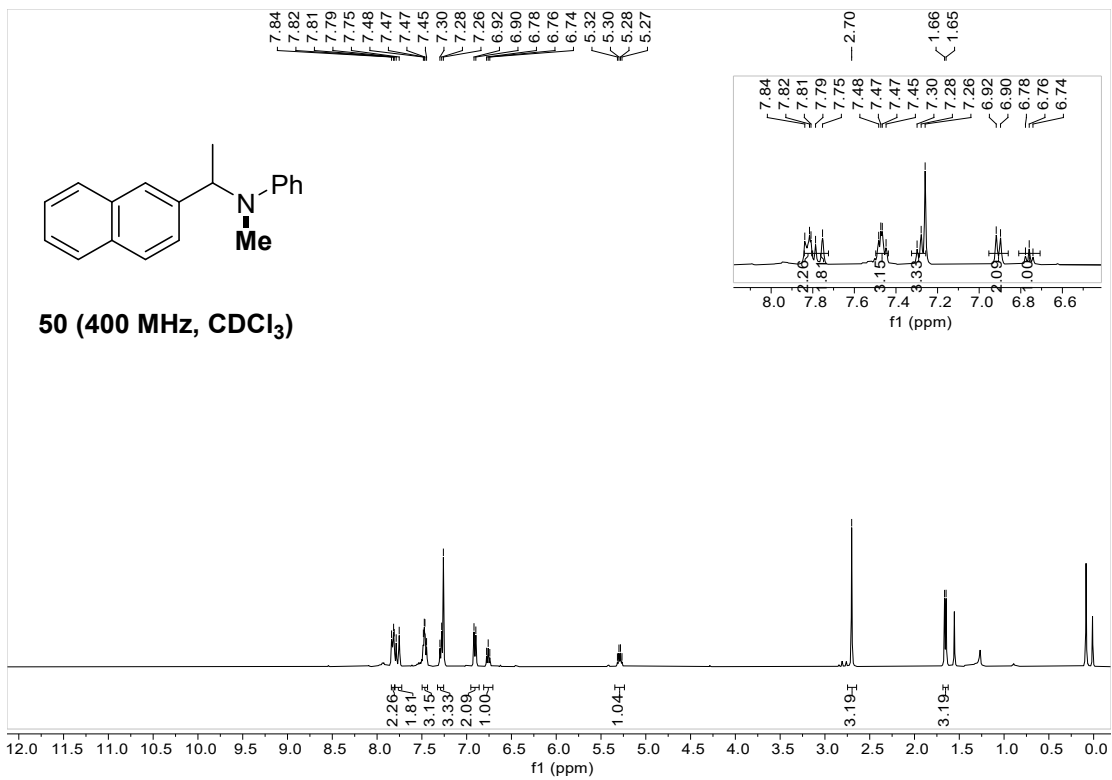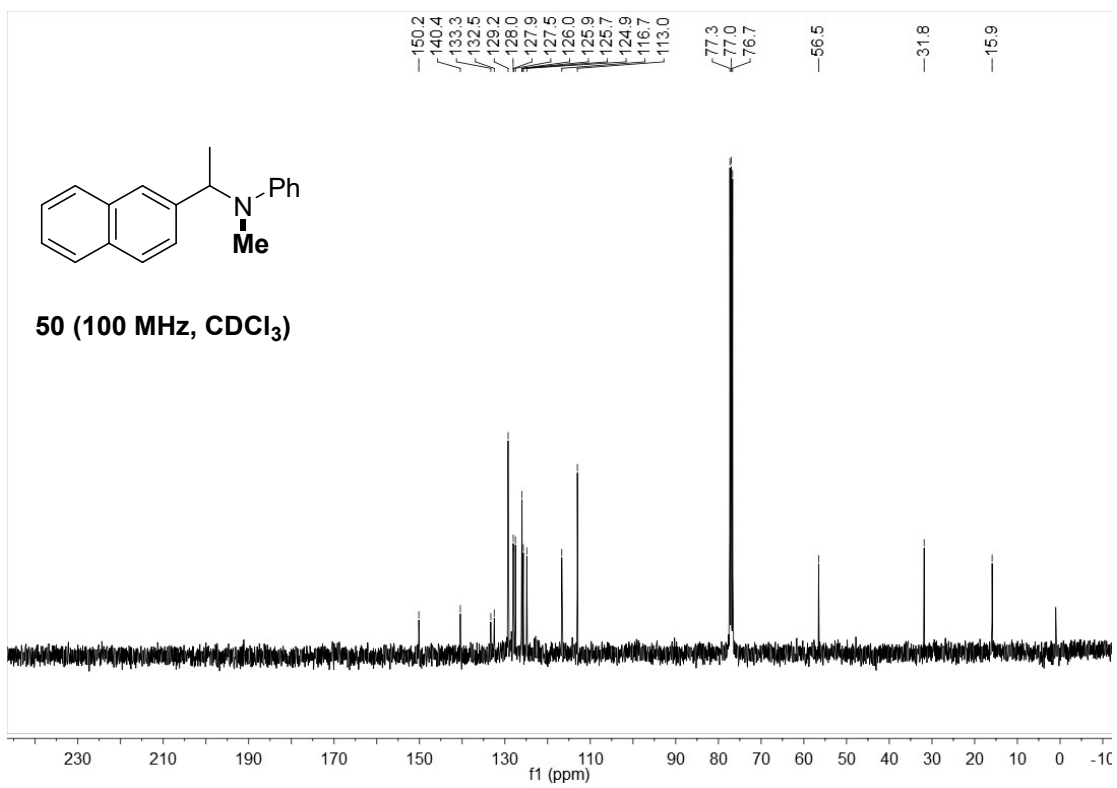

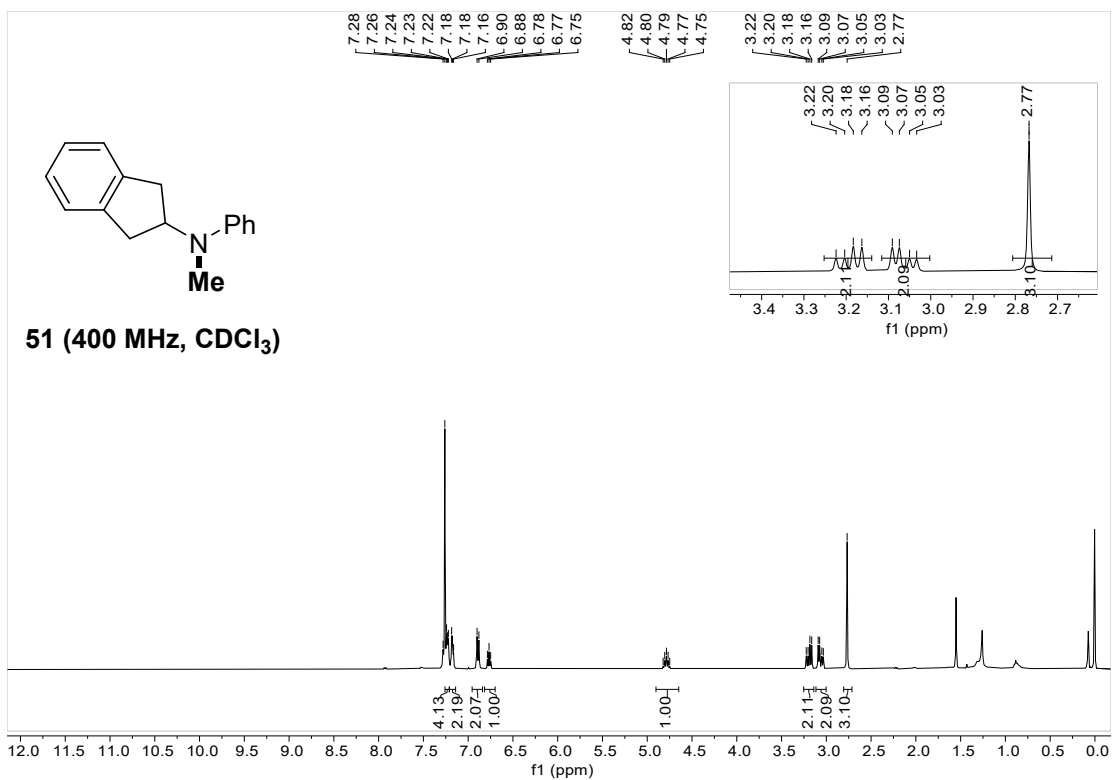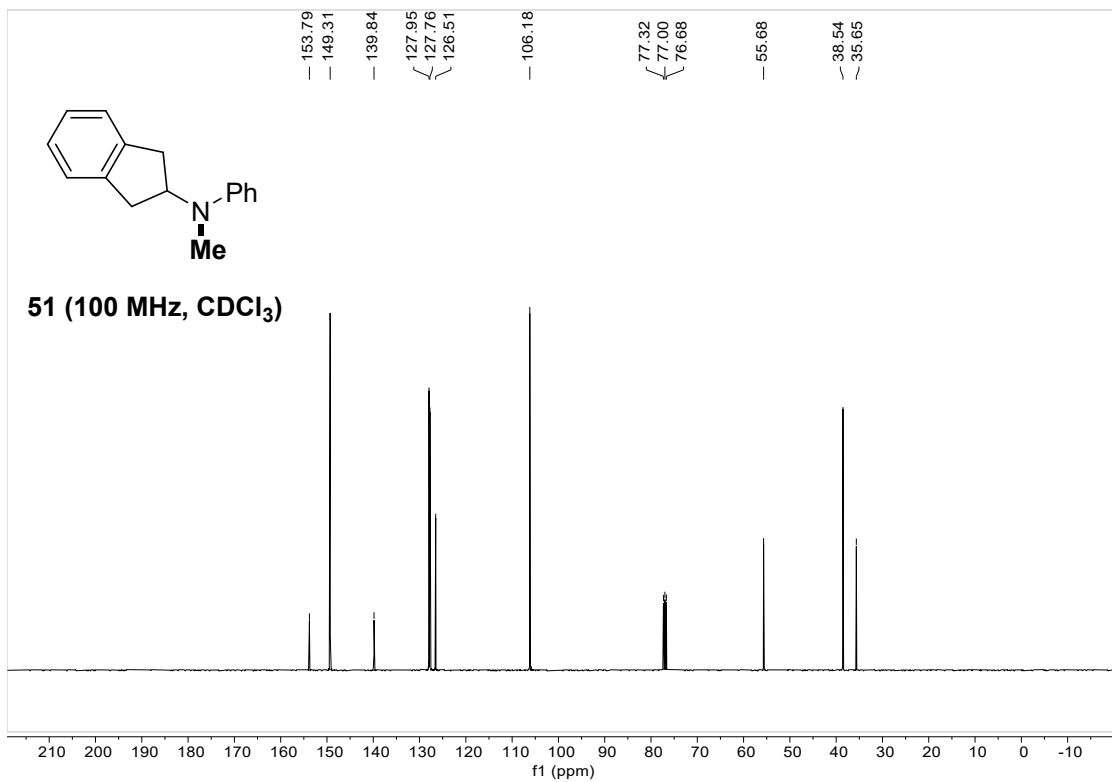



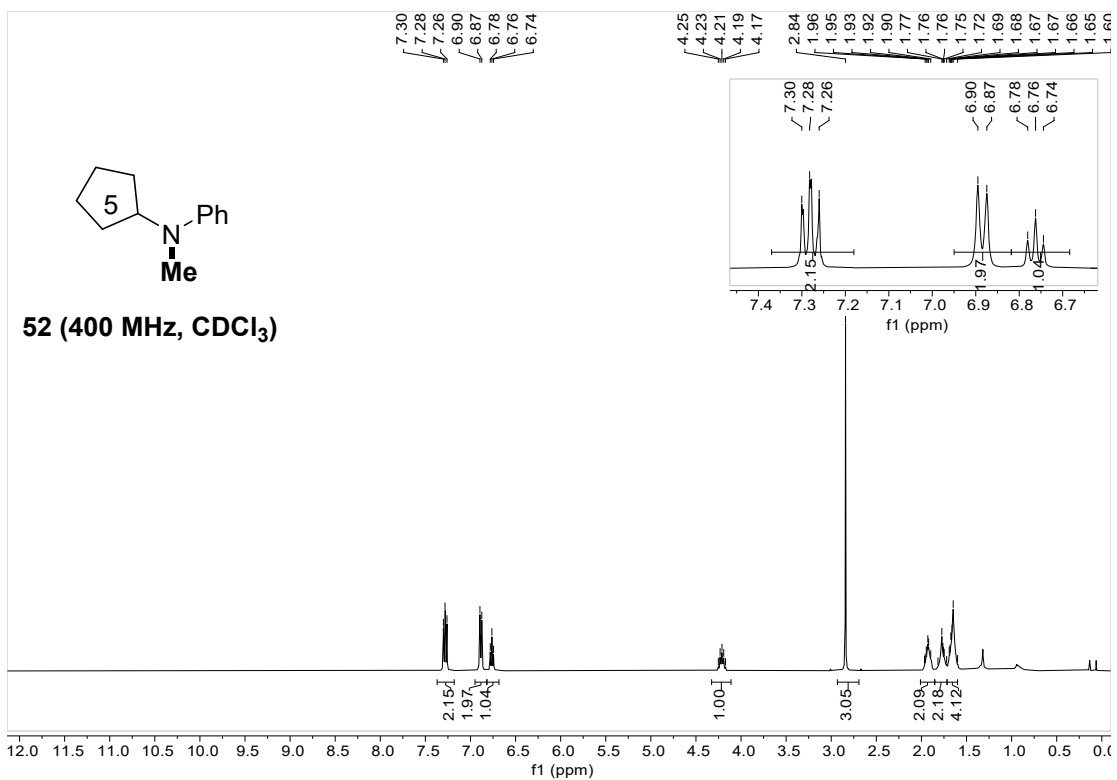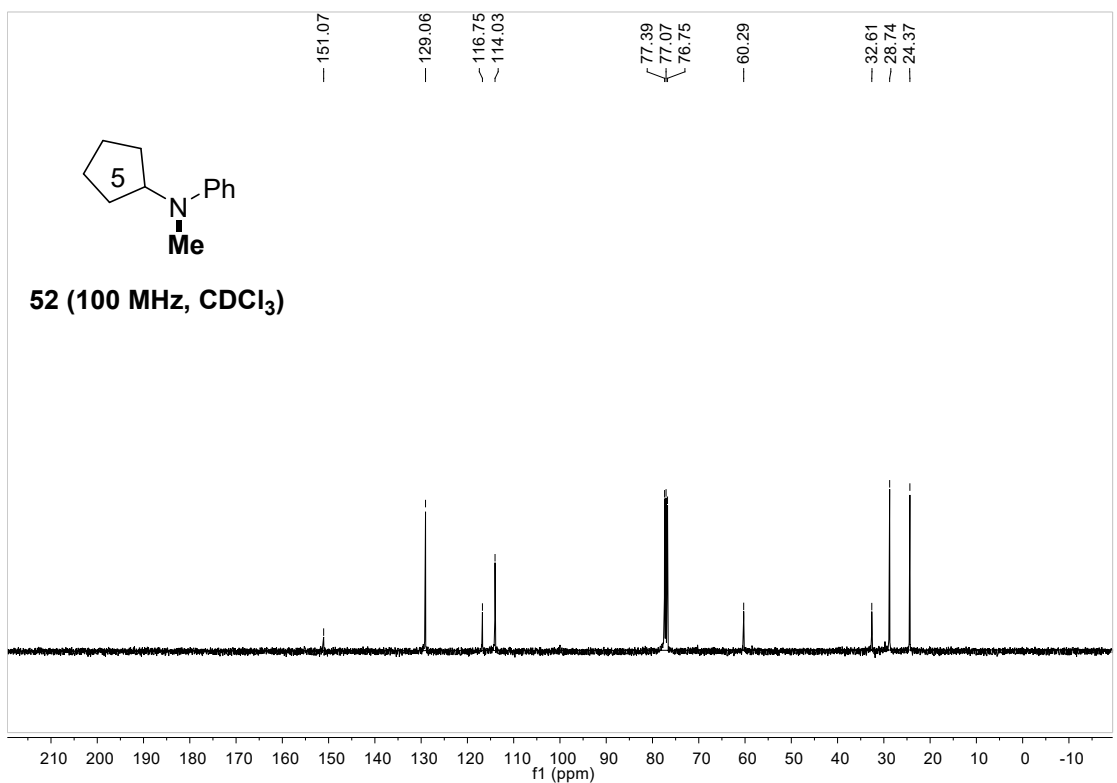

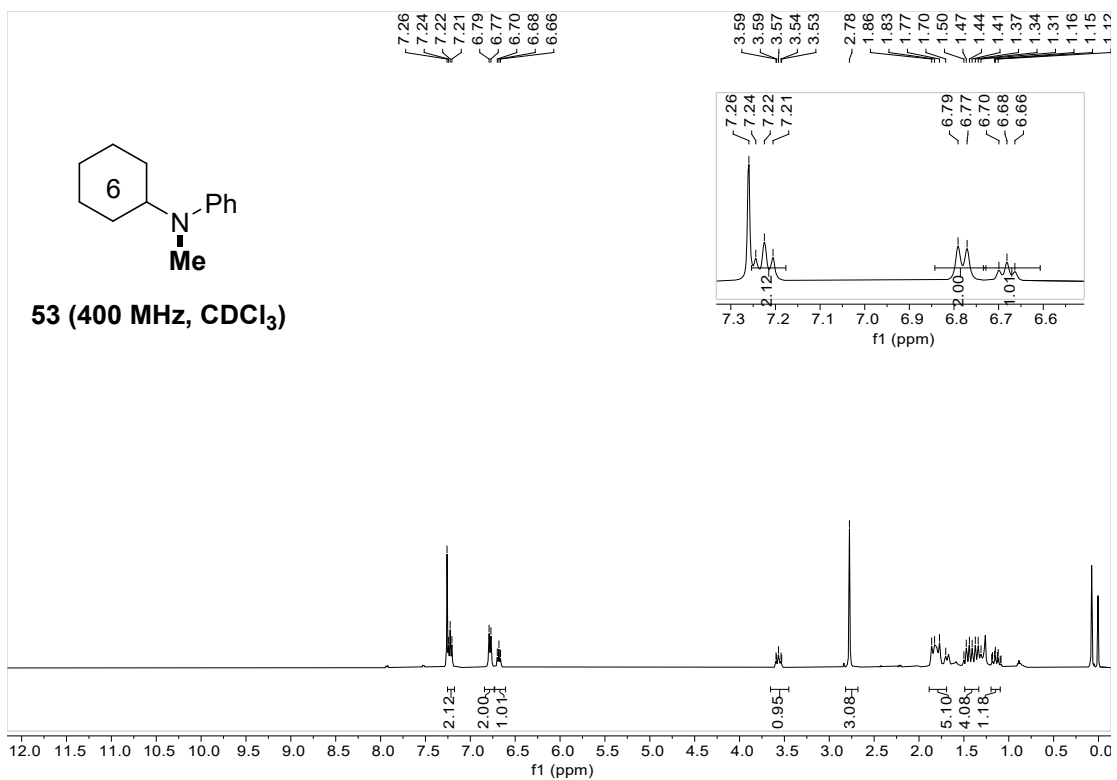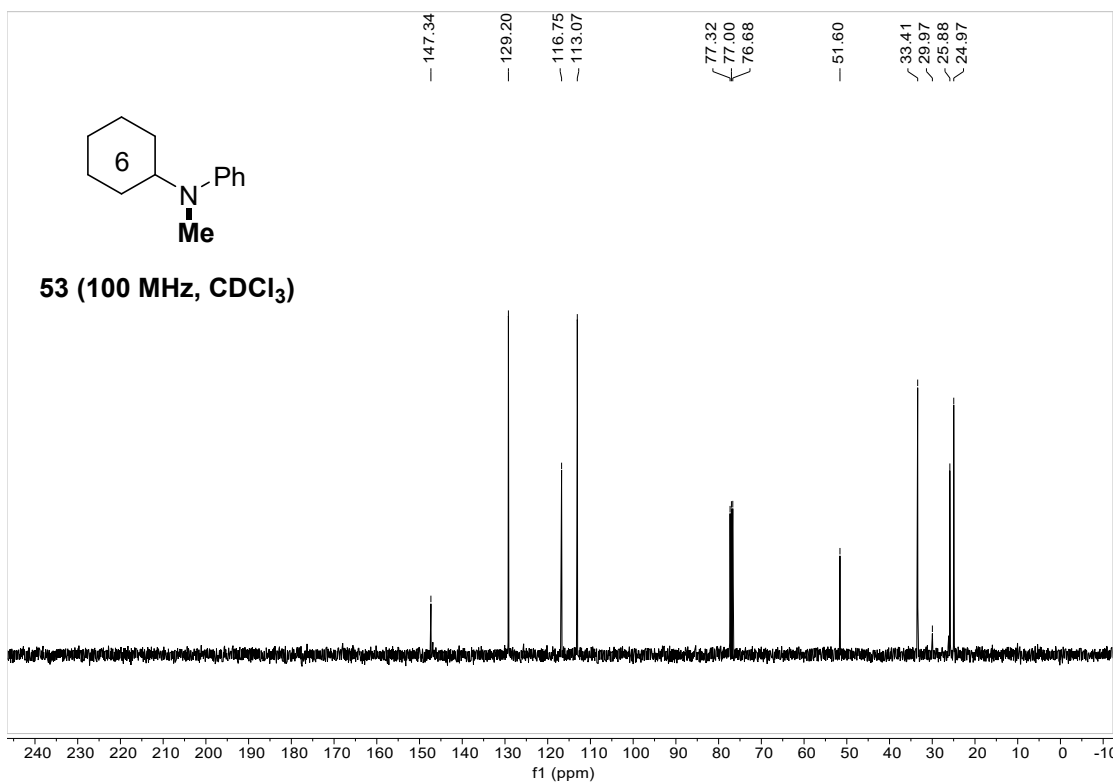

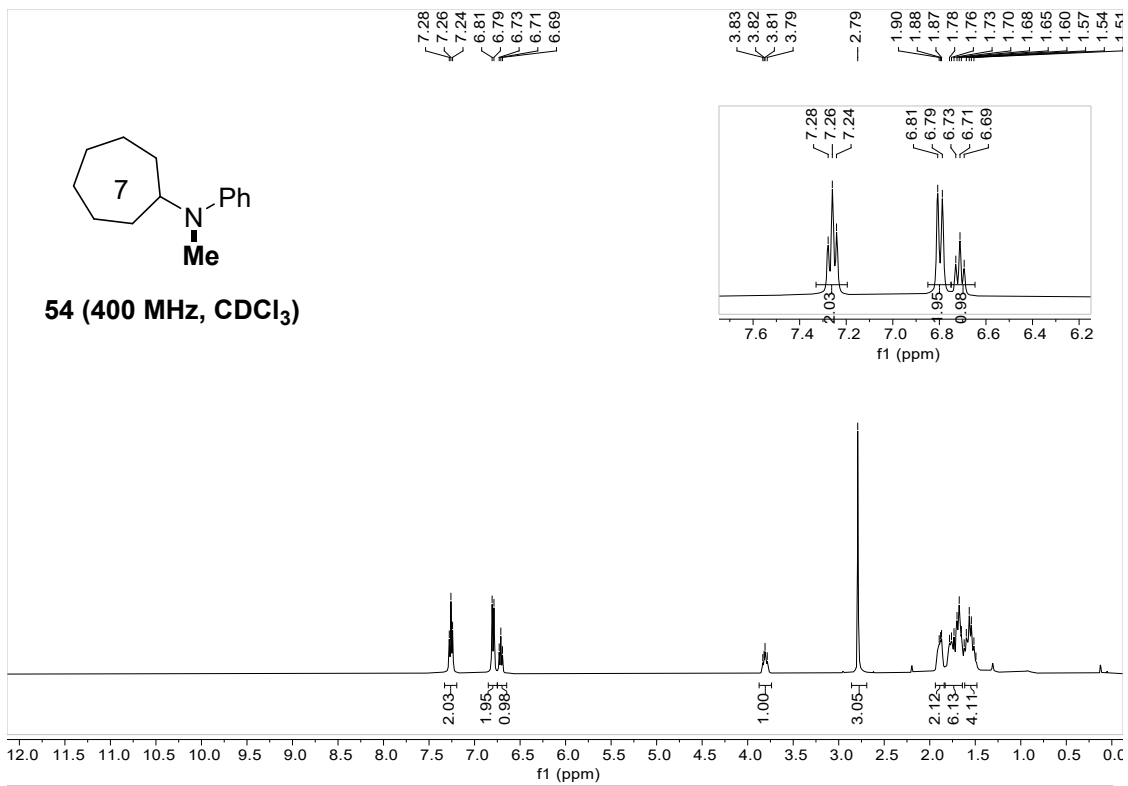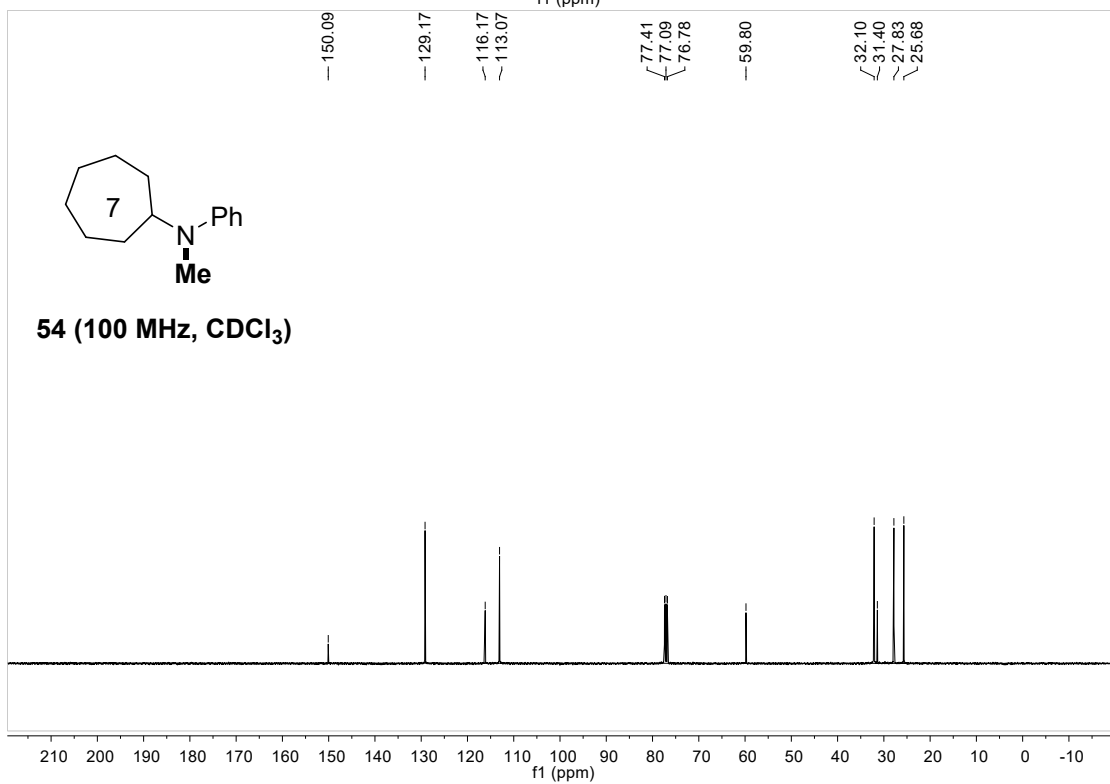

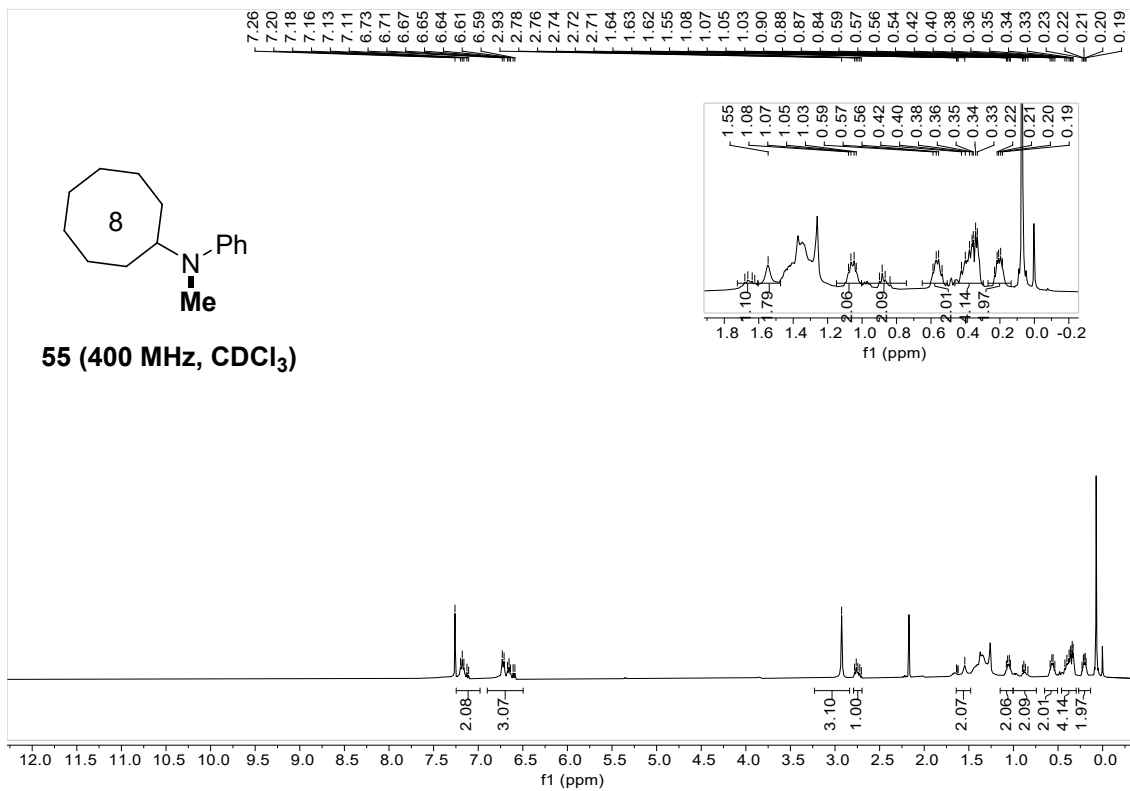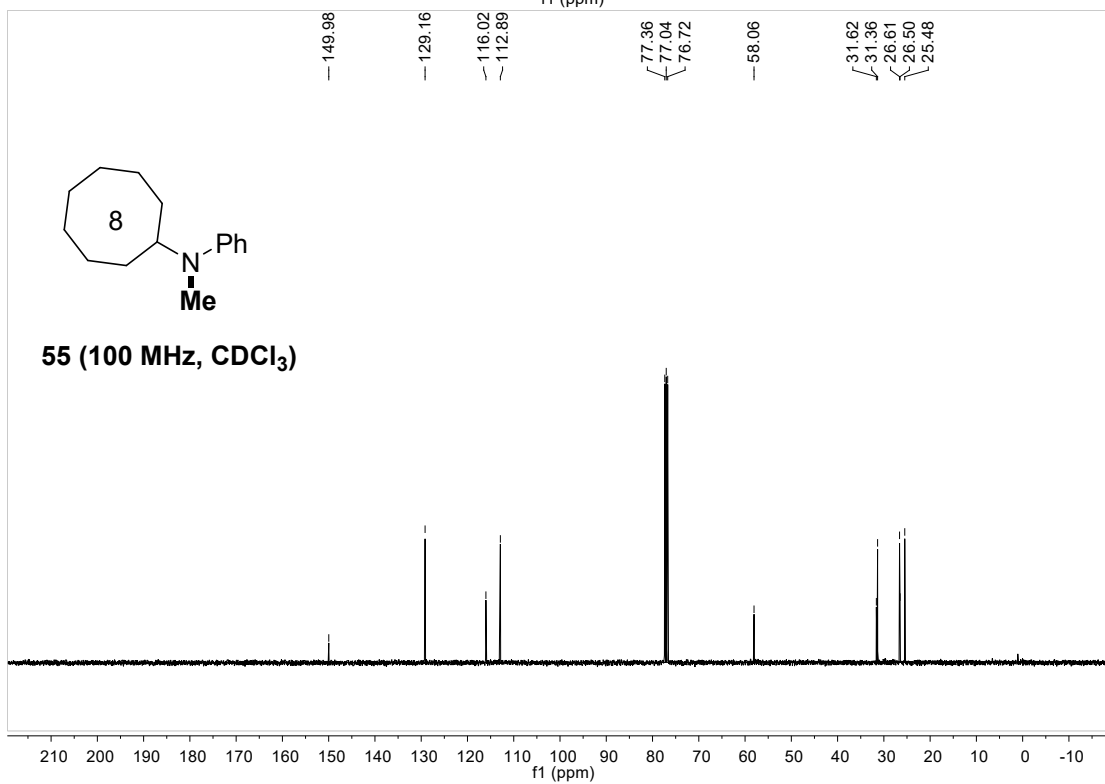

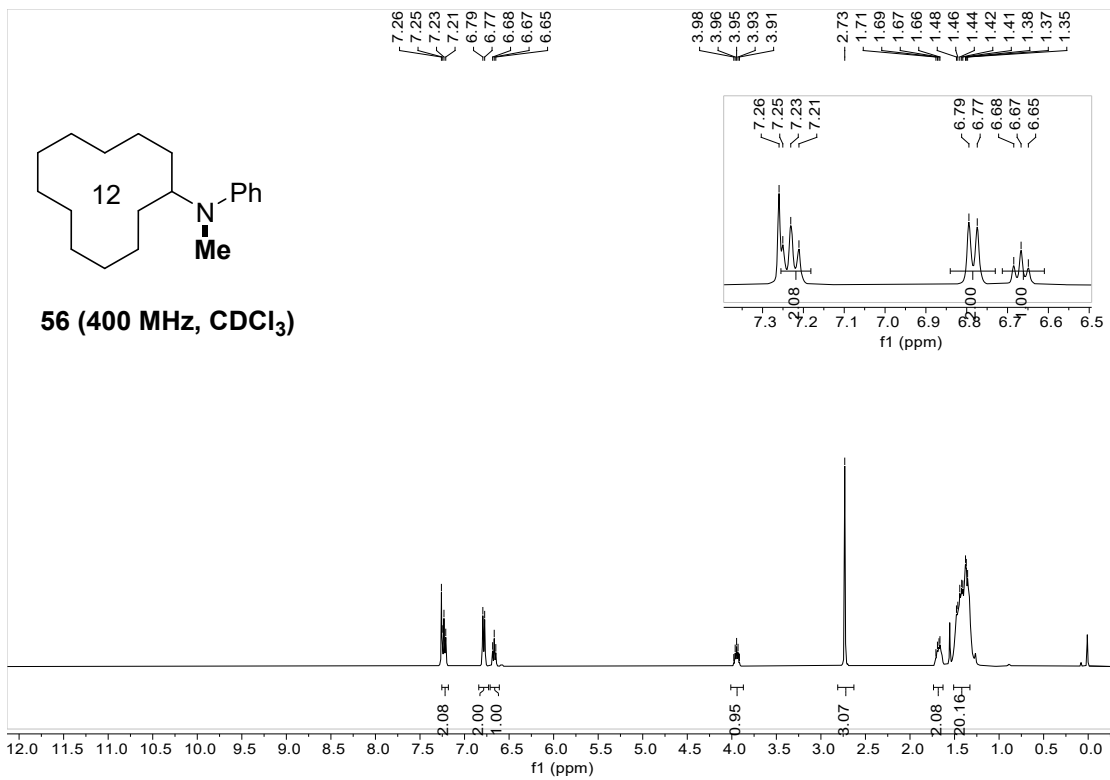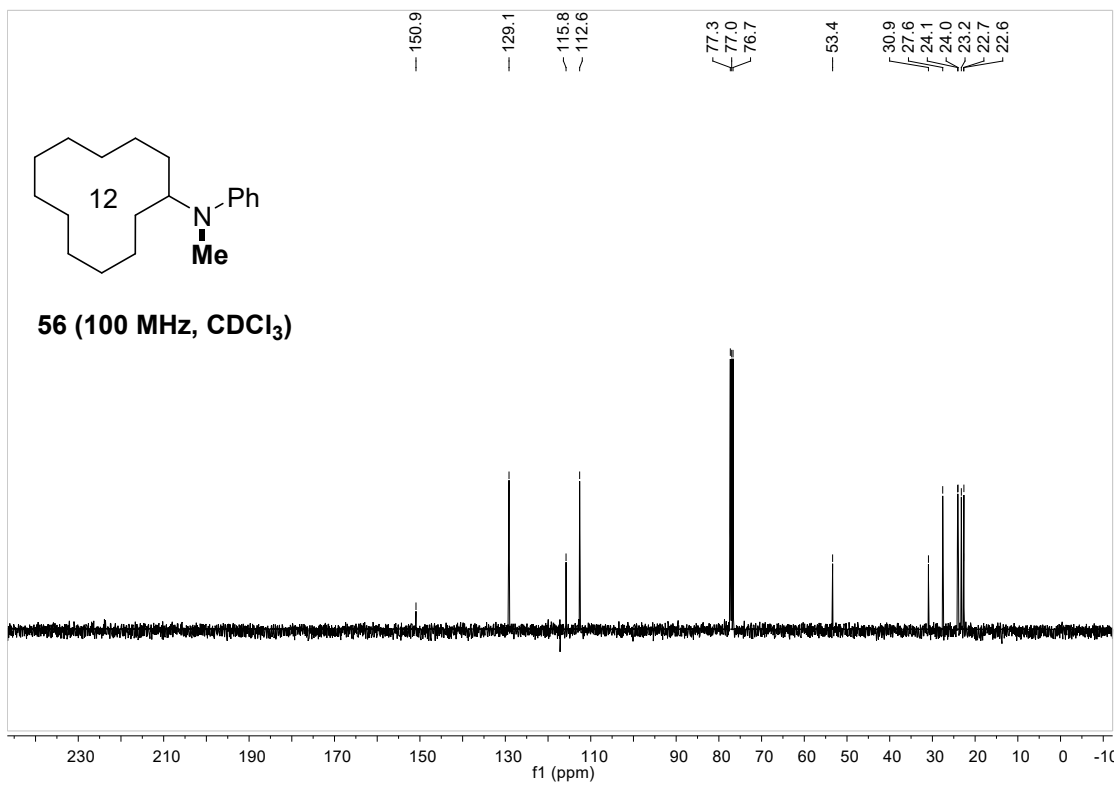

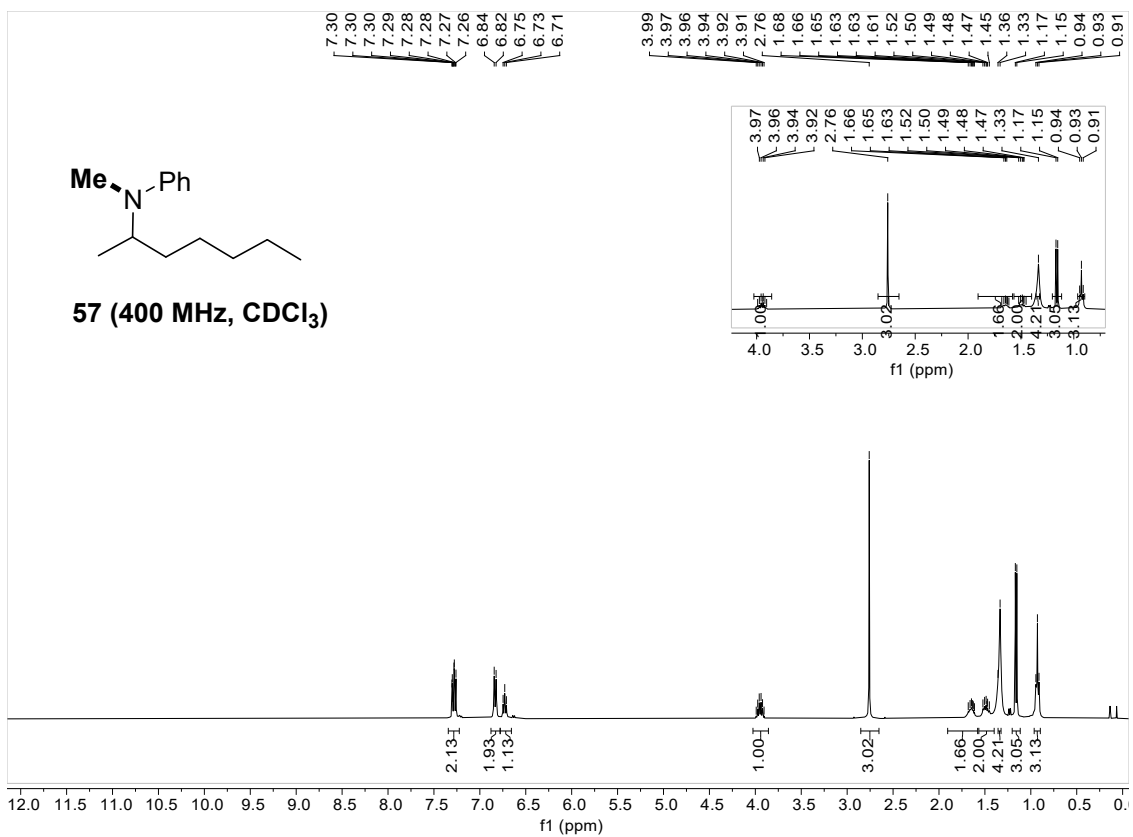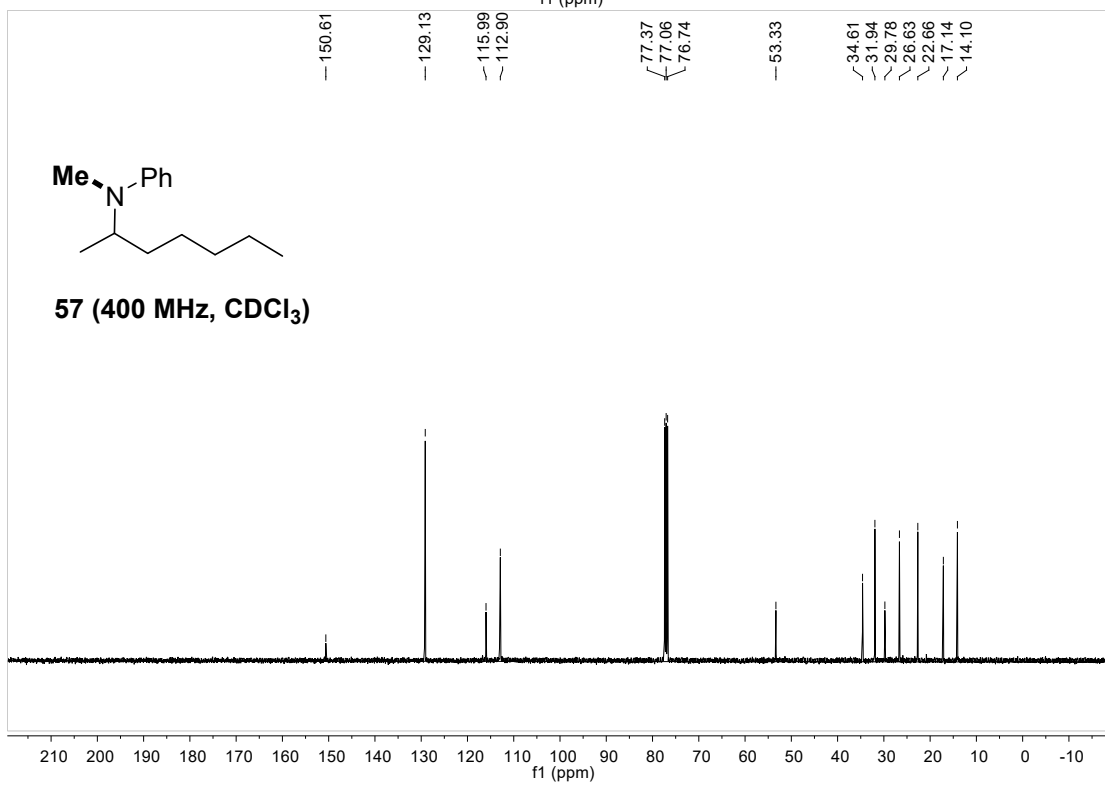

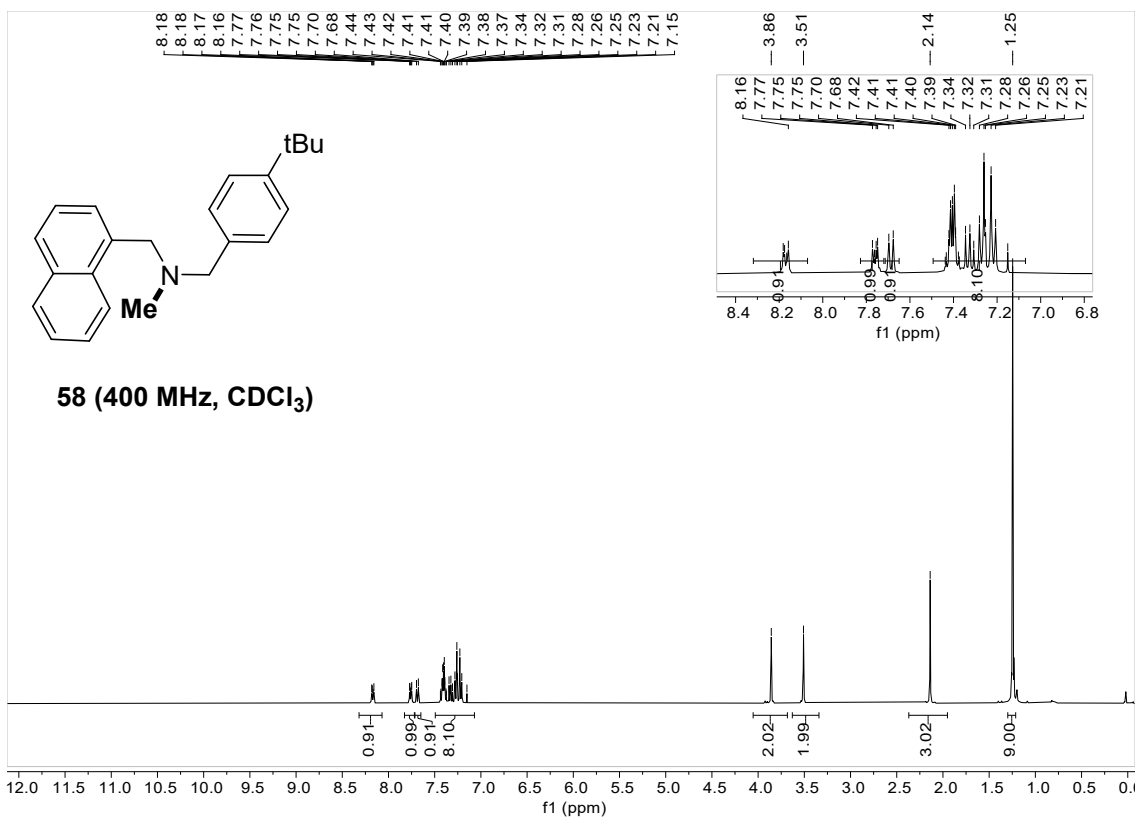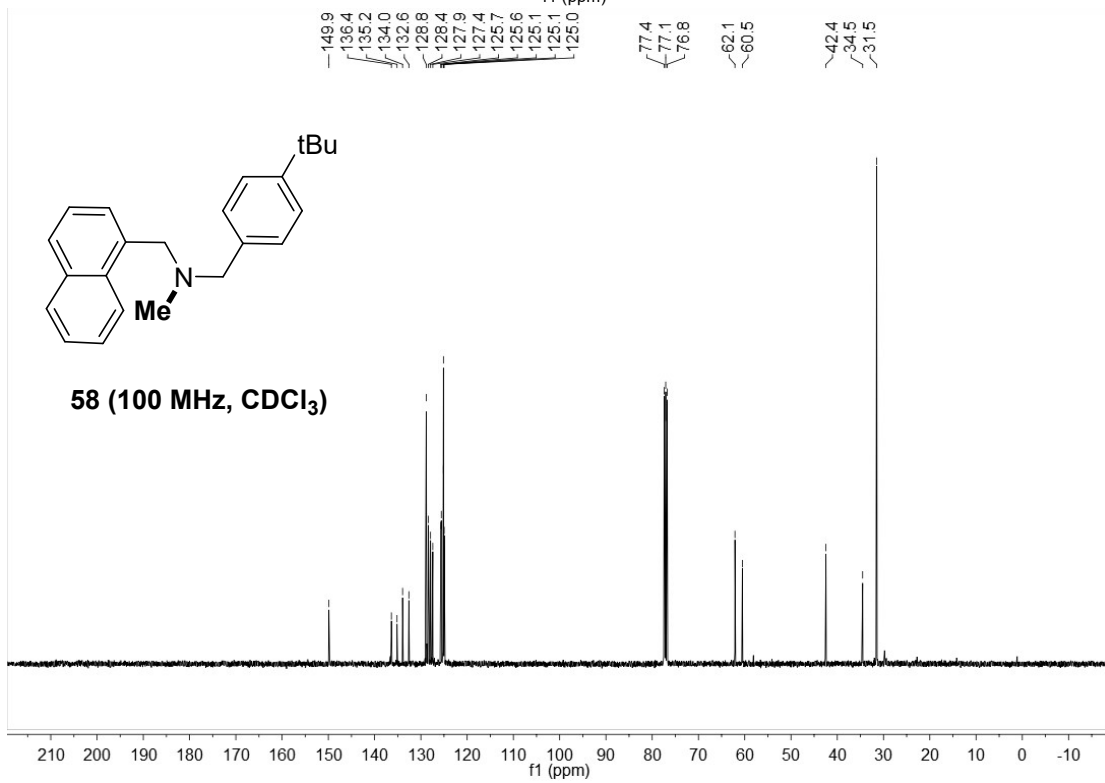

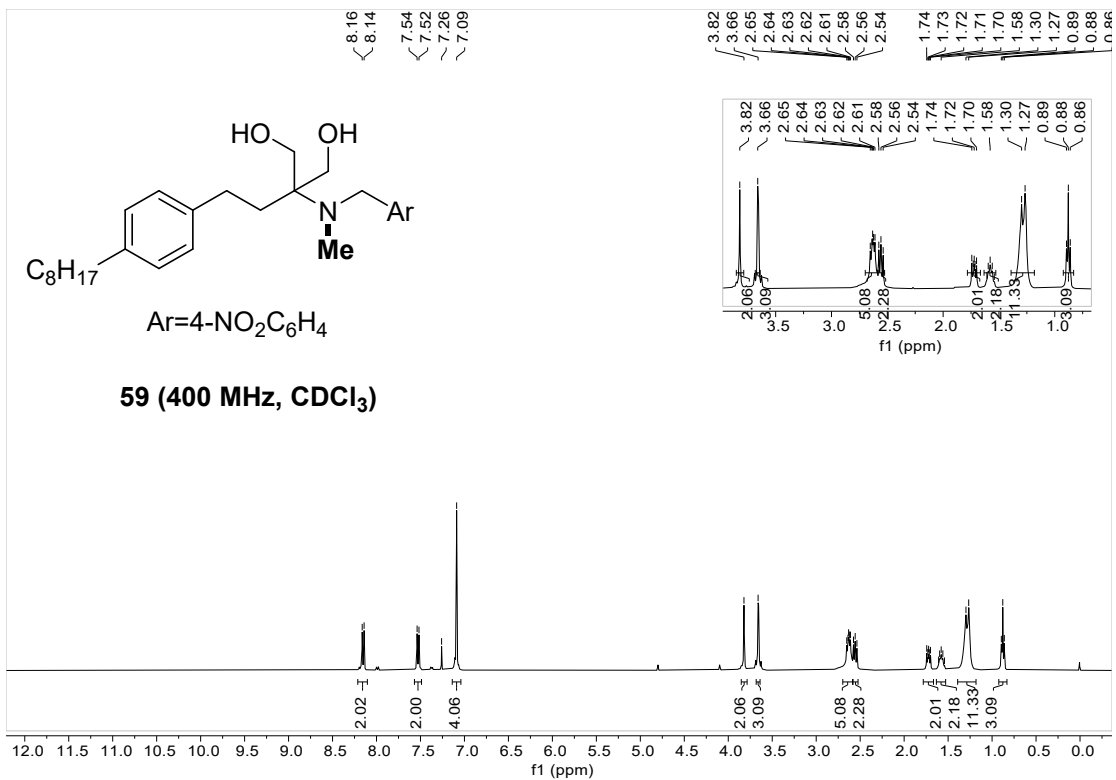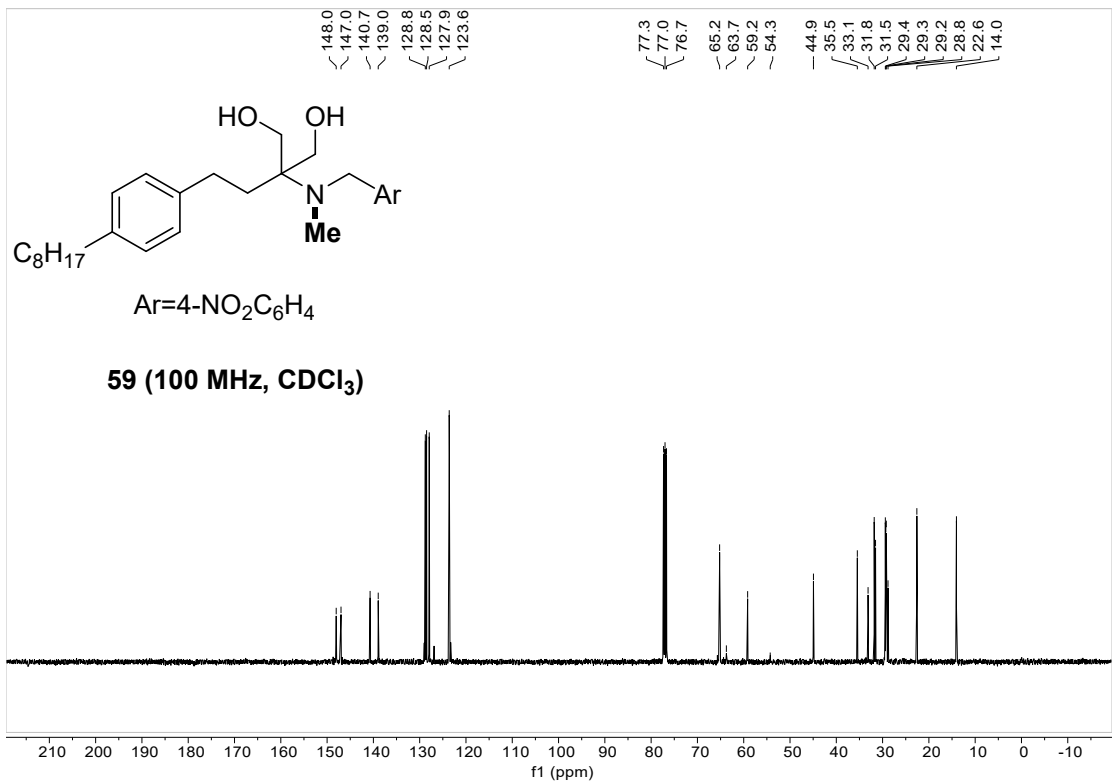



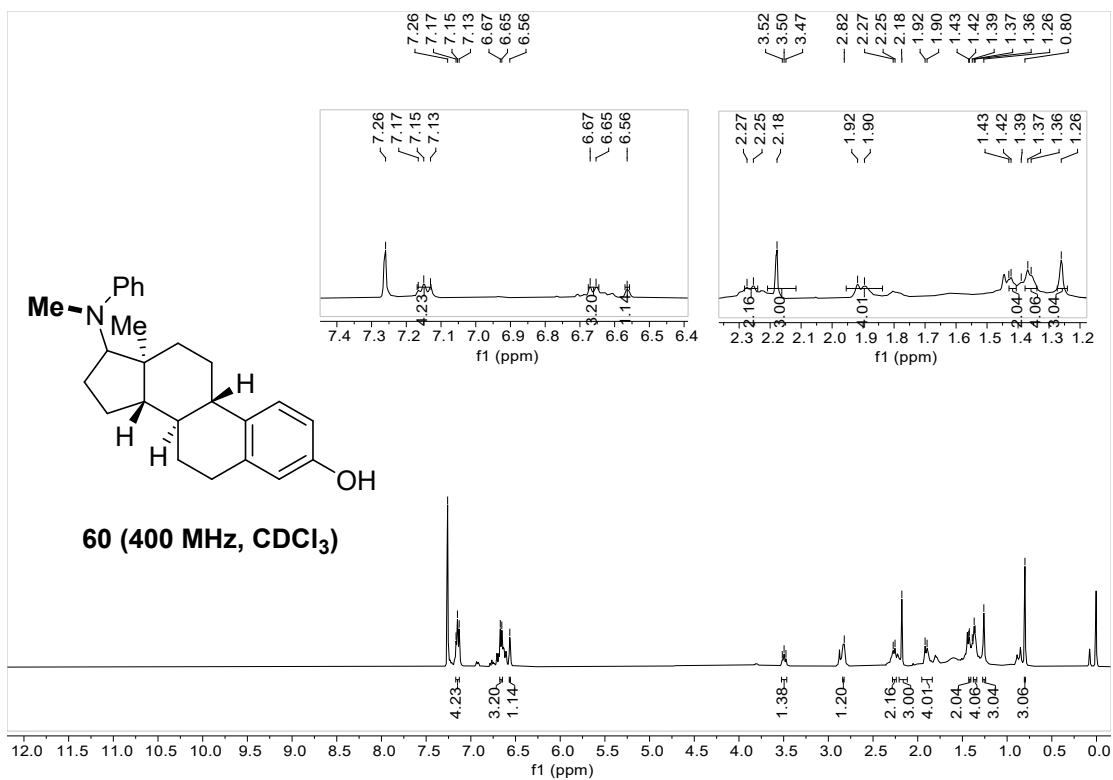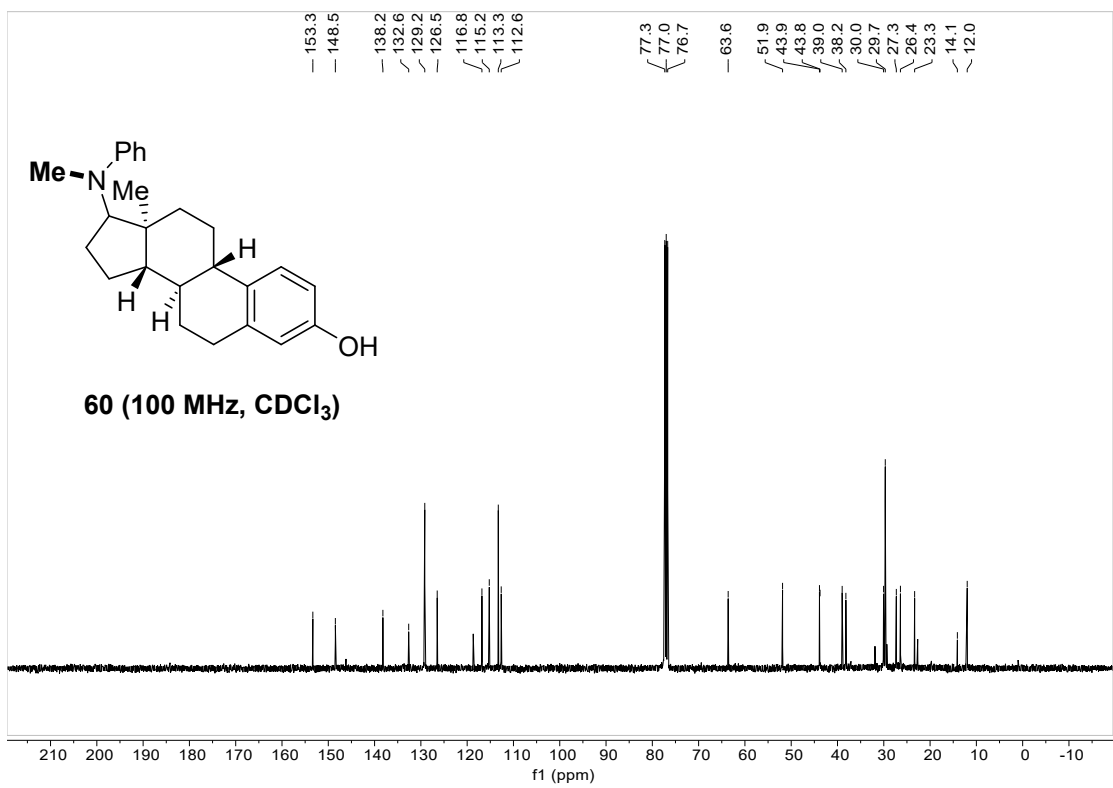

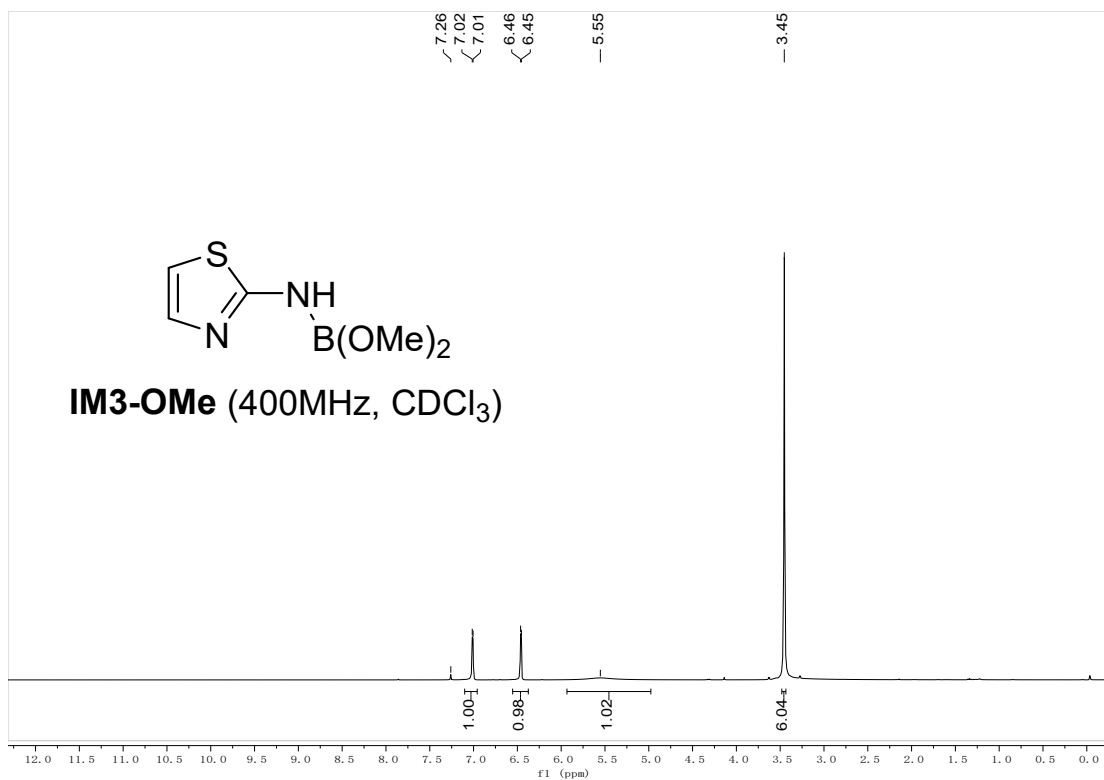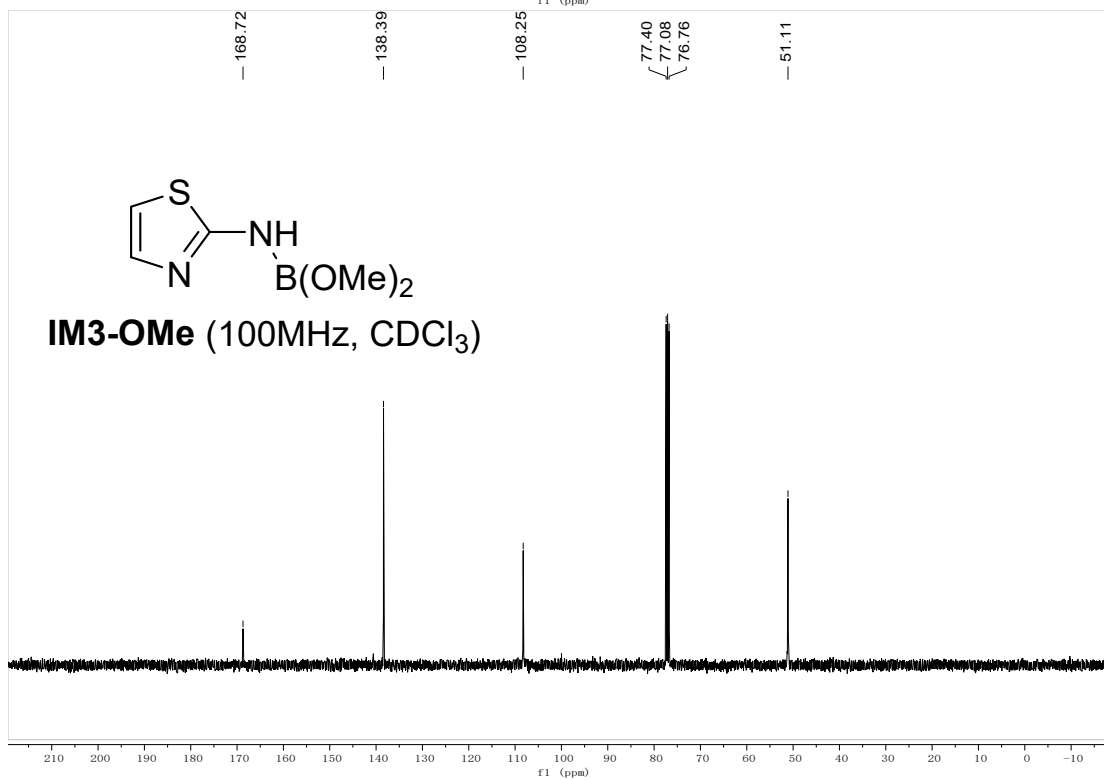

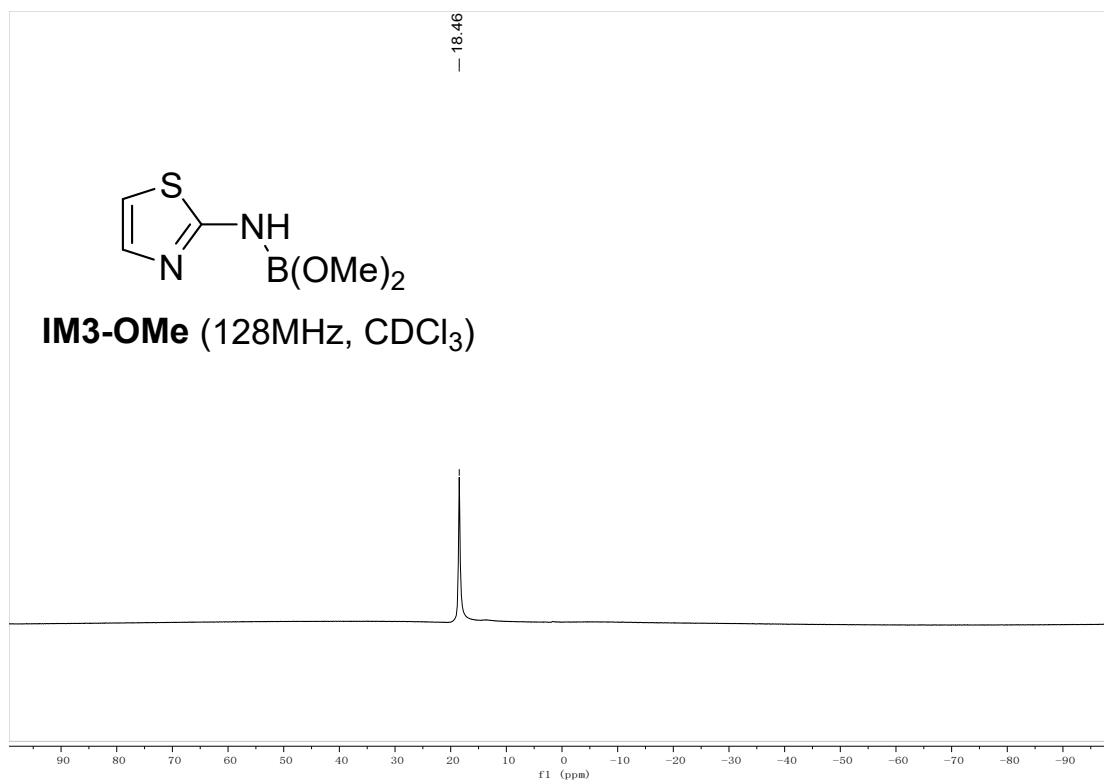

Supplement: d2qo00504b1.pdf [file d2qo00504b1.pdf]
